# Supplementary material for: Semisynthetic Derivatives of Selected Amaryllidaceae Alkaloids as a New Class of Antimycobacterial Agents
Source: MDPI journal article supplement (doi:10.3390/molecules26196023), 2021-10-04

Supplementary Material for:

## Semisynthetic derivatives of selected Amaryllidaceae alkaloids as a new class of antimycobacterial agents

Negar Maafi<sup>1</sup>, Abdullah Al Mamun<sup>1</sup>, Ondřej Jand'ourek<sup>2</sup>, Jana Maříková<sup>1,3</sup>, Kateřina Breiterová<sup>1</sup>, Adéla Diepoltová<sup>2</sup>, Klára Konečná<sup>2</sup>, Anna Hošťálková<sup>1</sup>, Daniela Hulcová<sup>1,4</sup>, Jiří Kuneš<sup>3</sup>, Eliška Kohelová<sup>1</sup>, Darja Koutová<sup>5</sup>, Marcela Šafratová<sup>1,4</sup>, Lucie Nováková<sup>6</sup>, and Lucie Cahlíková<sup>1,\*</sup>

<sup>1</sup> ADINACO Research Group, Department of Pharmaceutical Botany, Faculty of Pharmacy, Charles University, Heyrovského 1203, 500 05 Hradec Kralove, Czech Republic; [negarm@faf.cuni.cz](mailto:negarm@faf.cuni.cz) (N.M.); [breiterk@faf.cuni.cz](mailto:breiterk@faf.cuni.cz) (K.B.); [almamuna@faf.cuni.cz](mailto:almamuna@faf.cuni.cz) (A.A.M.); [HOSTA4AA@faf.cuni.cz](mailto:HOSTA4AA@faf.cuni.cz) (A.H.); [kohelove@faf.cuni.cz](mailto:kohelove@faf.cuni.cz) (E.K.)

<sup>2</sup> Department of Biological and Medical Sciences, Faculty of Pharmacy, Charles University, Heyrovského 1203, 500 05 Hradec Kralove, Czech Republic; [IAND06AA@faf.cuni.cz](mailto:IAND06AA@faf.cuni.cz) (O.J.); [konecna@faf.cuni.cz](mailto:konecna@faf.cuni.cz) (K.K.); [diepolta@faf.cuni.cz](mailto:diepolta@faf.cuni.cz) (A.D.)

<sup>3</sup> Department of Bioorganic and Organic Chemistry, Faculty of Pharmacy, Charles University, Heyrovského 1203, 500 05 Hradec Kralove, Czech Republic; [marikoj2@faf.cuni.cz](mailto:marikoj2@faf.cuni.cz) (J.M.); [kunes@faf.cuni.cz](mailto:kunes@faf.cuni.cz) (J.K.)

<sup>4</sup> Department of Pharmacognosy, Faculty of Pharmacy, Charles University, Heyrovského 1203, 500 05 Hradec Kralove, Czech Republic; [hulcovd@faf.cuni.cz](mailto:hulcovd@faf.cuni.cz) (D.H.); [safratom@faf.cuni.cz](mailto:safratom@faf.cuni.cz) (M.S.)

<sup>5</sup> Department of Medical Biochemistry, Faculty of Medicine, Charles University, Simkova 870, 500 03 Hradec Kralove, Czech Republic; [koutova.darja@lfhk.cuni.cz](mailto:koutova.darja@lfhk.cuni.cz) (D.J.)

<sup>6</sup> Department of Analytical Chemistry, Faculty of Pharmacy, Charles University, Heyrovského 1203, 500 05 Hradec Kralove, Czech Republic; [novakoval@faf.cuni.cz](mailto:novakoval@faf.cuni.cz) (L.N.)

\*Corresponding author: Prof. Lucie Cahlikova; Department of Pharmaceutical Botany, Faculty of Pharmacy, Charles University, Heyrovského 1203, 500 05 Hradec Kralove, Czech Republic

Tel.: + 420 495 067 311; fax: + 420 495 067 162; E-mail address: [cahlikova@faf.cuni.cz](mailto:cahlikova@faf.cuni.cz); ORCID ID: 0000-0002-1555-8870

## Table of Contents

|                                                                                                                                               |    |
|-----------------------------------------------------------------------------------------------------------------------------------------------|----|
| <b>Figure S1.</b> ESI-HRMS spectrum of 6- <i>O</i> -benzoylgalanthamine ( <b>1a</b> ).....                                                    | 5  |
| <b>Figure S2.</b> <sup>1</sup> H NMR spectrum of 6- <i>O</i> -benzoylgalanthamine ( <b>1a</b> ) in CDCl <sub>3</sub> .....                    | 5  |
| <b>Figure S3.</b> <sup>13</sup> C NMR spectrum of 6- <i>O</i> -benzoylgalanthamine ( <b>1a</b> ) in CDCl <sub>3</sub> .....                   | 5  |
| <b>Figure S4.</b> ESI-HRMS spectrum of 6- <i>O</i> -(2-methylbenzoyl)galanthamine ( <b>1b</b> ) .....                                         | 6  |
| <b>Figure S5.</b> <sup>1</sup> H NMR spectrum of 6- <i>O</i> -(2-methylbenzoyl)galanthamine ( <b>1b</b> ) in CDCl <sub>3</sub> .....          | 6  |
| <b>Figure S6.</b> <sup>13</sup> C NMR spectrum of 6- <i>O</i> -(2-methylbenzoyl)galanthamine ( <b>1b</b> ) in CDCl <sub>3</sub> .....         | 6  |
| <b>Figure S7.</b> ESI-HRMS spectrum of 6- <i>O</i> -(3-methylbenzoyl)galanthamine ( <b>1c</b> ).....                                          | 7  |
| <b>Figure S8.</b> <sup>1</sup> H NMR spectrum of 6- <i>O</i> -(3-methylbenzoyl)galanthamine ( <b>1c</b> ) in CDCl <sub>3</sub> .....          | 7  |
| <b>Figure S9.</b> <sup>13</sup> C NMR spectrum of 6- <i>O</i> -(3-methylbenzoyl)galanthamine ( <b>1c</b> ) in CDCl <sub>3</sub> .....         | 7  |
| <b>Figure S10.</b> ESI-HRMS spectrum of 6- <i>O</i> -(4-methylbenzoyl)galanthamine ( <b>1d</b> ) .....                                        | 8  |
| <b>Figure S11.</b> <sup>1</sup> H NMR spectrum of 6- <i>O</i> -(4-methylbenzoyl)galanthamine ( <b>1d</b> ) in CDCl <sub>3</sub> .....         | 8  |
| <b>Figure S12.</b> <sup>13</sup> C NMR spectrum of 6- <i>O</i> -(4-methylbenzoyl)galanthamine ( <b>1d</b> ) in CDCl <sub>3</sub> .....        | 8  |
| <b>Figure S13.</b> ESI-HRMS spectrum of 6- <i>O</i> -(2,3-dimethylbenzoyl)galanthamine ( <b>1e</b> ).....                                     | 9  |
| <b>Figure S14.</b> <sup>1</sup> H NMR spectrum of 6- <i>O</i> -(2,3-dimethylbenzoyl)galanthamine ( <b>1e</b> ) in CDCl <sub>3</sub> .....     | 9  |
| <b>Figure S15.</b> <sup>13</sup> C NMR spectrum of 6- <i>O</i> -(2,3-dimethylbenzoyl)galanthamine ( <b>1e</b> ) in CDCl <sub>3</sub> .....    | 9  |
| <b>Figure S16.</b> ESI-HRMS spectrum of 6- <i>O</i> -(3,5-dimethylbenzoyl)galanthamine ( <b>1f</b> ) .....                                    | 10 |
| <b>Figure S17.</b> <sup>1</sup> H NMR spectrum of 6- <i>O</i> -(3,5-dimethylbenzoyl)galanthamine ( <b>1f</b> ) in CDCl <sub>3</sub> .....     | 10 |
| <b>Figure S18.</b> <sup>13</sup> C NMR spectrum of 6- <i>O</i> -(3,5-dimethylbenzoyl)galanthamine ( <b>1f</b> ) in CDCl <sub>3</sub> .....    | 10 |
| <b>Figure S19.</b> ESI-HRMS spectrum of 6- <i>O</i> -(2,4,6-trimethylbenzoyl)galanthamine ( <b>1g</b> ) .....                                 | 11 |
| <b>Figure S20.</b> <sup>1</sup> H NMR spectrum of 6- <i>O</i> -(2,4,6-trimethylbenzoyl)galanthamine ( <b>1g</b> ) in CDCl <sub>3</sub> .....  | 11 |
| <b>Figure S21.</b> <sup>13</sup> C NMR spectrum of 6- <i>O</i> -(2,4,6-trimethylbenzoyl)galanthamine ( <b>1g</b> ) in CDCl <sub>3</sub> ..... | 11 |
| <b>Figure S22.</b> ESI-HRMS spectrum of 6- <i>O</i> -(4-tert-butylbenzoyl)galanthamine ( <b>1h</b> ).....                                     | 12 |
| <b>Figure S23.</b> <sup>1</sup> H NMR spectrum of 6- <i>O</i> -(4-tert-butylbenzoyl)galanthamine ( <b>1h</b> ) in CDCl <sub>3</sub> .....     | 12 |
| <b>Figure S24.</b> <sup>13</sup> C NMR spectrum of 6- <i>O</i> -(4-tert-butylbenzoyl)galanthamine ( <b>1h</b> ) in CDCl <sub>3</sub> .....    | 12 |
| <b>Figure S25.</b> ESI-HRMS spectrum of 6- <i>O</i> -(4-butylbenzoyl)galanthamine ( <b>1i</b> ) .....                                         | 13 |
| <b>Figure S26.</b> <sup>1</sup> H NMR spectrum of 6- <i>O</i> -(4-butylbenzoyl)galanthamine ( <b>1i</b> ) in CDCl <sub>3</sub> .....          | 13 |
| <b>Figure S27.</b> <sup>13</sup> C NMR spectrum of 6- <i>O</i> -(4-butylbenzoyl)galanthamine ( <b>1i</b> ) in CDCl <sub>3</sub> .....         | 13 |
| <b>Figure S28.</b> ESI-HRMS spectrum of 6- <i>O</i> -(2-methoxybenzoyl)galanthamine ( <b>1j</b> ) .....                                       | 14 |
| <b>Figure S29.</b> <sup>1</sup> H NMR spectrum of 6- <i>O</i> -(2-methoxybenzoyl)galanthamine ( <b>1j</b> ) in CDCl <sub>3</sub> .....        | 14 |
| <b>Figure S30.</b> <sup>13</sup> C NMR spectrum of 6- <i>O</i> -(2-methoxybenzoyl)galanthamine ( <b>1j</b> ) in CDCl <sub>3</sub> .....       | 14 |
| <b>Figure S31.</b> ESI-HRMS spectrum of 6- <i>O</i> -(3-methoxybenzoyl)galanthamine ( <b>1k</b> ) .....                                       | 15 |
| <b>Figure S32.</b> <sup>1</sup> H NMR spectrum of 6- <i>O</i> -(3-methoxybenzoyl)galanthamine ( <b>1k</b> ) in CDCl <sub>3</sub> .....        | 15 |
| <b>Figure S33.</b> <sup>13</sup> C NMR spectrum of 6- <i>O</i> -(3-methoxybenzoyl)galanthamine ( <b>1k</b> ) in CDCl <sub>3</sub> .....       | 15 |
| <b>Figure S34.</b> ESI-HRMS spectrum of 6- <i>O</i> -(4-methoxybenzoyl)galanthamine ( <b>1l</b> ).....                                        | 16 |
| <b>Figure S35.</b> <sup>1</sup> H NMR spectrum of 6- <i>O</i> -(4-methoxybenzoyl)galanthamine ( <b>1l</b> ) in CDCl <sub>3</sub> .....        | 16 |
| <b>Figure S36.</b> <sup>13</sup> C NMR spectrum of 6- <i>O</i> -(4-methoxybenzoyl)galanthamine ( <b>1l</b> ) in CDCl <sub>3</sub> .....       | 16 |

|                                                                                                                                                                 |    |
|-----------------------------------------------------------------------------------------------------------------------------------------------------------------|----|
| <b>Figure S37.</b> ESI-HRMS spectrum of 6- <i>O</i> -(3,4-dimethoxybenzoyl)galanthamine ( <b>1m</b> ) .....                                                     | 17 |
| <b>Figure S38.</b> <sup>1</sup> H NMR spectrum of 6- <i>O</i> -(3,4-dimethoxybenzoyl)galanthamine ( <b>1m</b> ) in CDCl <sub>3</sub> .....                      | 17 |
| <b>Figure S39.</b> <sup>13</sup> C NMR spectrum of 6- <i>O</i> -(3,4-dimethoxybenzoyl)galanthamine ( <b>1m</b> ) in CDCl <sub>3</sub> .....                     | 17 |
| <b>Figure S40.</b> ESI-HRMS spectrum of 6- <i>O</i> -(3,5-dimethoxybenzoyl)galanthamine ( <b>1n</b> ) .....                                                     | 18 |
| <b>Figure S41.</b> <sup>1</sup> H NMR spectrum of 6- <i>O</i> -(3,5-dimethoxybenzoyl)galanthamine ( <b>1n</b> ) in CDCl <sub>3</sub> .....                      | 18 |
| <b>Figure S42.</b> <sup>13</sup> C NMR spectrum of 6- <i>O</i> -(3,5-dimethoxybenzoyl)galanthamine ( <b>1n</b> ) in CDCl <sub>3</sub> .....                     | 18 |
| <b>Figure S43.</b> ESI-HRMS spectrum of 6- <i>O</i> -(3,4,5-trimethoxybenzoyl)galanthamine ( <b>1o</b> ) .....                                                  | 19 |
| <b>Figure S44.</b> <sup>1</sup> H NMR spectrum of 6- <i>O</i> -(3,4,5-trimethoxybenzoyl)galanthamine ( <b>1o</b> ) in CDCl <sub>3</sub> .....                   | 19 |
| <b>Figure S45.</b> <sup>13</sup> C NMR spectrum of 6- <i>O</i> -(3,4,5-trimethoxybenzoyl)galanthamine ( <b>1o</b> ) in CDCl <sub>3</sub> .....                  | 19 |
| <b>Figure S46.</b> ESI-HRMS spectrum of 6- <i>O</i> -(3,5-diethoxybenzoyl)galanthamine ( <b>1p</b> ) .....                                                      | 20 |
| <b>Figure S47.</b> <sup>1</sup> H NMR spectrum of 6- <i>O</i> -(3,5-diethoxybenzoyl)galanthamine ( <b>1p</b> ) in CDCl <sub>3</sub> .....                       | 20 |
| <b>Figure S48.</b> <sup>13</sup> C NMR spectrum of 6- <i>O</i> -(3,5-diethoxybenzoyl)galanthamine ( <b>1p</b> ) in CDCl <sub>3</sub> .....                      | 20 |
| <b>Figure S49.</b> ESI-HRMS spectrum of 6- <i>O</i> -(1-naphtoyl)galanthamine ( <b>1q</b> ) .....                                                               | 21 |
| <b>Figure S50.</b> <sup>1</sup> H NMR spectrum of 6- <i>O</i> -(1-naphtoyl)galanthamine ( <b>1q</b> ) in CDCl <sub>3</sub> .....                                | 21 |
| <b>Figure S51.</b> <sup>13</sup> C NMR spectrum of 6- <i>O</i> -(1-naphtoyl)galanthamine ( <b>1q</b> ) in CDCl <sub>3</sub> .....                               | 21 |
| <b>Figure S52.</b> ESI-HRMS spectrum of 6- <i>O</i> -(2-naphtoyl)galanthamine ( <b>1r</b> ) .....                                                               | 22 |
| <b>Figure S53.</b> <sup>1</sup> H NMR spectrum of 6- <i>O</i> -(2-naphtoyl)galanthamine ( <b>1r</b> ) in CDCl <sub>3</sub> .....                                | 22 |
| <b>Figure S54.</b> <sup>13</sup> C NMR spectrum of 6- <i>O</i> -(2-naphtoyl)galanthamine ( <b>1r</b> ) in CDCl <sub>3</sub> .....                               | 22 |
| <b>Figure S55.</b> ESI-HRMS spectrum of 6- <i>O</i> -(2-furoyl)galanthamine ( <b>1s</b> ) .....                                                                 | 23 |
| <b>Figure S56.</b> <sup>1</sup> H NMR spectrum of 6- <i>O</i> -(2-furoyl)galanthamine ( <b>1s</b> ) in CDCl <sub>3</sub> .....                                  | 23 |
| <b>Figure S57.</b> <sup>13</sup> C NMR spectrum of 6- <i>O</i> -(2-furoyl)galanthamine ( <b>1s</b> ) in CDCl <sub>3</sub> .....                                 | 23 |
| <b>Figure S58.</b> ESI-HRMS spectrum of 3- <i>O</i> -methylpancracine ( <b>3</b> ) .....                                                                        | 24 |
| <b>Figure S59.</b> <sup>1</sup> H NMR spectrum of 3- <i>O</i> -methylpancracine ( <b>3</b> ) in CDCl <sub>3</sub> .....                                         | 24 |
| <b>Figure S60.</b> <sup>13</sup> C NMR spectrum of 3- <i>O</i> -methylpancracine ( <b>3</b> ) in CDCl <sub>3</sub> .....                                        | 25 |
| <b>Figure S61.</b> ESI-HRMS spectrum of 2- <i>O</i> -(3,5-dimethylbenzoyl)-3- <i>O</i> -methylpancracine ( <b>3a</b> ) .....                                    | 25 |
| <b>Figure S62.</b> <sup>1</sup> H NMR spectrum of 2- <i>O</i> -(3,5-dimethylbenzoyl)-3- <i>O</i> -methylpancracine ( <b>3a</b> ) in CDCl <sub>3</sub> .....     | 25 |
| <b>Figure S63.</b> <sup>13</sup> C NMR spectrum of 2- <i>O</i> -(3,5-dimethylbenzoyl)-3- <i>O</i> -methylpancracine ( <b>3a</b> ) in CDCl <sub>3</sub> .....    | 26 |
| <b>Figure S64.</b> ESI-HRMS spectrum of 2- <i>O</i> -(2,4,6-trimethylbenzoyl)-3- <i>O</i> -methylpancracine ( <b>3b</b> ) ...                                   | 26 |
| <b>Figure S65.</b> <sup>1</sup> H NMR spectrum of 2- <i>O</i> -(2,4,6-trimethylbenzoyl)-3- <i>O</i> -methylpancracine ( <b>3b</b> ) in CDCl <sub>3</sub> .....  | 26 |
| <b>Figure S66.</b> <sup>13</sup> C NMR spectrum of 2- <i>O</i> -(2,4,6-trimethylbenzoyl)-3- <i>O</i> -methylpancracine ( <b>3b</b> ) in CDCl <sub>3</sub> ..... | 27 |
| <b>Figure S67.</b> ESI-HRMS spectrum of 2- <i>O</i> -(4-tert-butylbenzoyl)-3- <i>O</i> -methylpancracine ( <b>3c</b> ) .....                                    | 27 |
| <b>Figure S68.</b> <sup>1</sup> H NMR spectrum of 2- <i>O</i> -(4-tert-butylbenzoyl)-3- <i>O</i> -methylpancracine ( <b>3c</b> ) in CDCl <sub>3</sub> .....     | 27 |
| <b>Figure S69.</b> <sup>13</sup> C NMR spectrum of 2- <i>O</i> -(4-tert-butylbenzoyl)-3- <i>O</i> -methylpancracine ( <b>3c</b> ) in CDCl <sub>3</sub> .....    | 28 |

|                                                                                                                                                                 |    |
|-----------------------------------------------------------------------------------------------------------------------------------------------------------------|----|
| <b>Figure S70.</b> ESI-HRMS spectrum of 2- <i>O</i> -(4-butylbenzoyl)-3- <i>O</i> -methylpancracine ( <b>3d</b> ).....                                          | 28 |
| <b>Figure S71.</b> <sup>1</sup> H NMR spectrum of 2- <i>O</i> -(4-butylbenzoyl)-3- <i>O</i> -methylpancracine ( <b>3d</b> ) in CDCl <sub>3</sub> ....           | 29 |
| <b>Figure S72.</b> <sup>13</sup> C NMR spectrum of 2- <i>O</i> -(4-butylbenzoyl)-3- <i>O</i> -methylpancracine ( <b>3d</b> ) in CDCl <sub>3</sub> ...           | 29 |
| <b>Figure S73.</b> ESI-HRMS spectrum of 2- <i>O</i> -(3,5-diethoxybenzoyl)-3- <i>O</i> -methylpancracine ( <b>3e</b> ) .....                                    | 29 |
| <b>Figure S74.</b> <sup>1</sup> H NMR spectrum of 2- <i>O</i> -(3,5-diethoxybenzoyl)-3- <i>O</i> -methylpancracine ( <b>3e</b> ) in CDCl <sub>3</sub><br>.....  | 30 |
| <b>Figure S75.</b> <sup>13</sup> C NMR spectrum of 2- <i>O</i> -(3,5-diethoxybenzoyl)-3- <i>O</i> -methylpancracine ( <b>3e</b> ) in CDCl <sub>3</sub><br>..... | 30 |
| <b>Figure S76.</b> ESI-HRMS spectrum of 2- <i>O</i> -(1-naphtoyl)-3- <i>O</i> -methylpancracine ( <b>3f</b> ) .....                                             | 31 |
| <b>Figure S77.</b> <sup>1</sup> H NMR spectrum of 2- <i>O</i> -(1-naphtoyl)-3- <i>O</i> -methylpancracine ( <b>3f</b> ) in CDCl <sub>3</sub> .....              | 31 |
| <b>Figure S78.</b> <sup>13</sup> C NMR spectrum of 2- <i>O</i> -(1-naphtoyl)-3- <i>O</i> -methylpancracine ( <b>3f</b> ) in CDCl <sub>3</sub> .....             | 31 |
| <b>Figure S79.</b> ESI-HRMS spectrum of 2- <i>O</i> -(2-naphtoyl)-3- <i>O</i> -methylpancracine ( <b>3g</b> ).....                                              | 32 |
| <b>Figure S80.</b> <sup>1</sup> H NMR spectrum of 2- <i>O</i> -(2-naphtoyl)-3- <i>O</i> -methylpancracine ( <b>3g</b> ) in CDCl <sub>3</sub> .....              | 32 |
| <b>Figure S81.</b> <sup>13</sup> C NMR spectrum of 2- <i>O</i> -(2-naphtoyl)-3- <i>O</i> -methylpancracine ( <b>3g</b> ) in CDCl <sub>3</sub> .....             | 32 |
| <b>Figure S82.</b> ESI-HRMS spectrum of 3- <i>O</i> -(1-naphtoyl)vittatine ( <b>4a</b> ).....                                                                   | 33 |
| <b>Figure S83.</b> <sup>1</sup> H NMR spectrum of 3- <i>O</i> -(1-naphtoyl)vittatine ( <b>4a</b> ) in CDCl <sub>3</sub> .....                                   | 33 |
| <b>Figure S84.</b> <sup>13</sup> C NMR spectrum of 3- <i>O</i> -(1-naphtoyl)vittatine ( <b>4a</b> ) in CDCl <sub>3</sub> .....                                  | 33 |
| <b>Figure S85.</b> ESI-HRMS spectrum of 3- <i>O</i> -(2-naphtoyl)vittatine ( <b>4b</b> ).....                                                                   | 34 |
| <b>Figure S86.</b> <sup>1</sup> H NMR spectrum of 3- <i>O</i> -(2-naphtoyl)vittatine ( <b>4b</b> ) in CDCl <sub>3</sub> .....                                   | 34 |
| <b>Figure S87.</b> <sup>13</sup> C NMR spectrum of 3- <i>O</i> -(2-naphtoyl)vittatine ( <b>4b</b> ) in CDCl <sub>3</sub> .....                                  | 34 |
| <b>Figure S88.</b> ESI-HRMS spectrum of 3- <i>O</i> -(3,5-dimethylbenzoyl)maritidine ( <b>5a</b> ).....                                                         | 35 |
| <b>Figure S89.</b> <sup>1</sup> H NMR spectrum of 3- <i>O</i> -(3,5-dimethylbenzoyl)maritidine ( <b>5a</b> ) in CDCl <sub>3</sub> .....                         | 35 |
| <b>Figure S90.</b> <sup>13</sup> C NMR spectrum of 3- <i>O</i> -(3,5-dimethylbenzoyl)maritidine ( <b>5a</b> ) in CDCl <sub>3</sub> .....                        | 35 |
| <b>Figure S91.</b> ESI-HRMS spectrum of 3- <i>O</i> -(1-naphtoyl)maritidine ( <b>5b</b> ) .....                                                                 | 36 |
| <b>Figure S92.</b> <sup>1</sup> H NMR spectrum of 3- <i>O</i> -(1-naphtoyl)maritidine ( <b>5b</b> ) in CDCl <sub>3</sub> .....                                  | 36 |
| <b>Figure S93.</b> <sup>13</sup> C NMR spectrum of 3- <i>O</i> -(1-naphtoyl)maritidine ( <b>5b</b> ) in CDCl <sub>3</sub> .....                                 | 36 |

**Figure S1.** ESI-HRMS spectrum of 6-*O*-benzoylgalanthamine (**1a**)

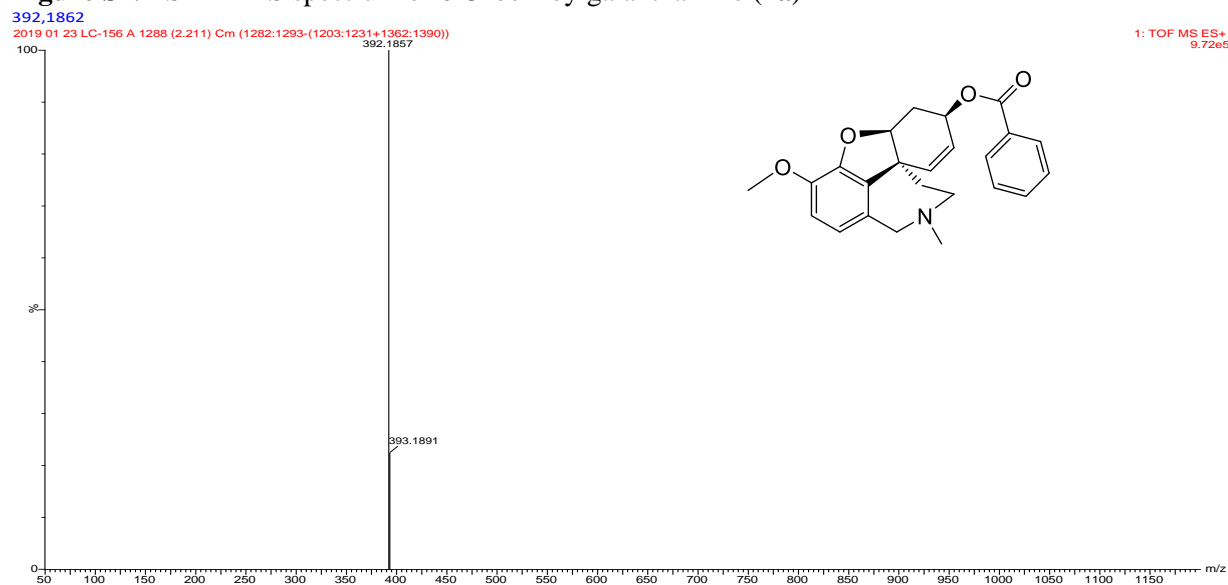

**Figure S2.**  $^1\text{H}$  NMR spectrum of 6-*O*-benzoylgalanthamine (**1a**) in  $\text{CDCl}_3$

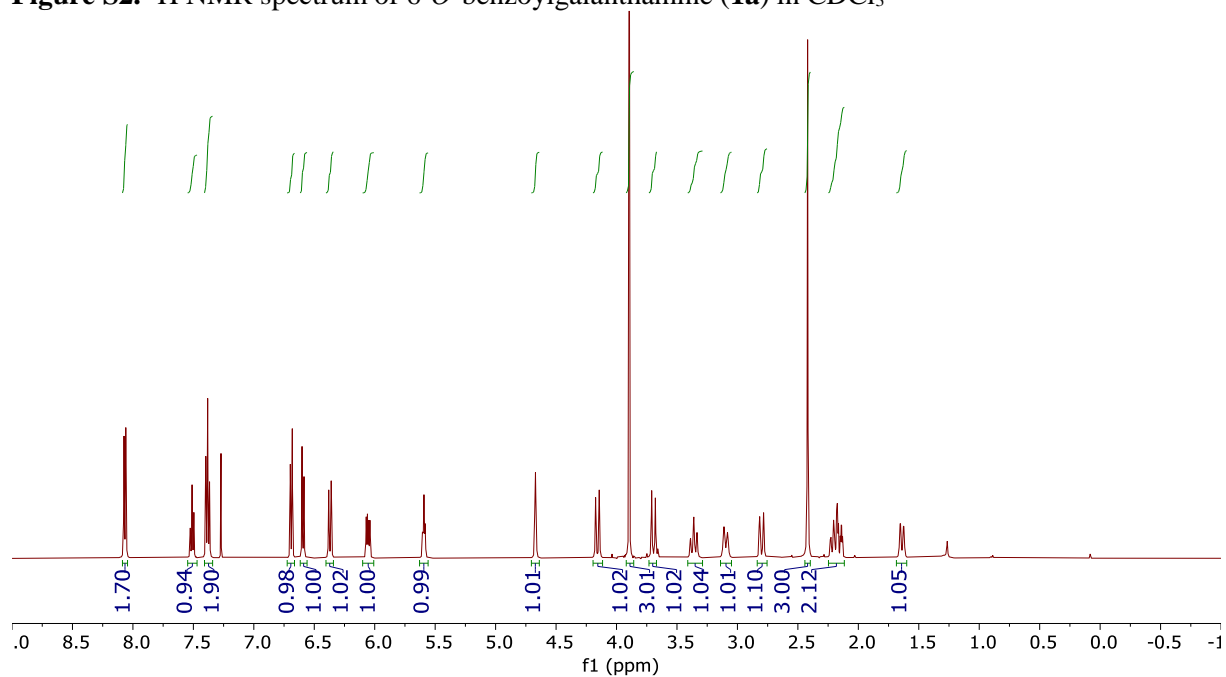

**Figure S3.**  $^{13}\text{C}$  NMR spectrum of 6-*O*-benzoylgalanthamine (**1a**) in  $\text{CDCl}_3$

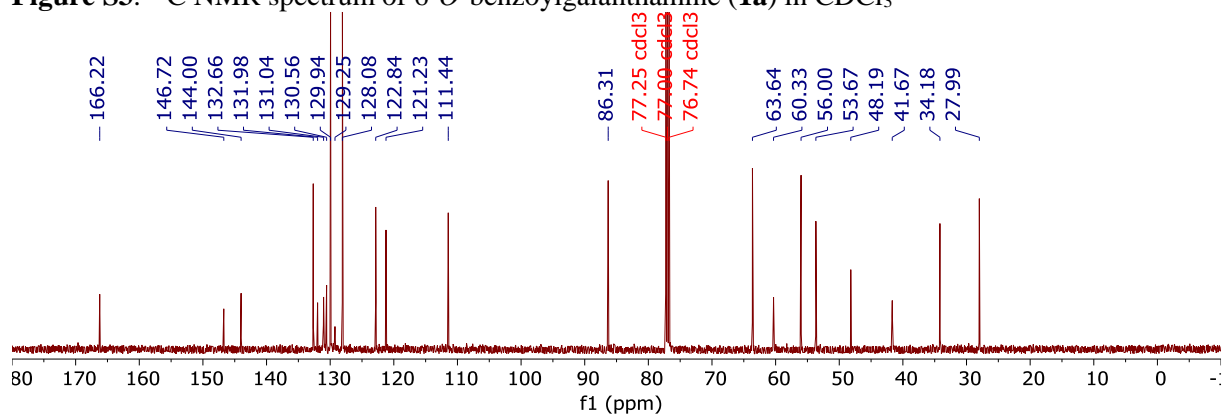

**Figure S4.** ESI-HRMS spectrum of 6-*O*-(2-methylbenzoyl)galanthamine (**1b**)

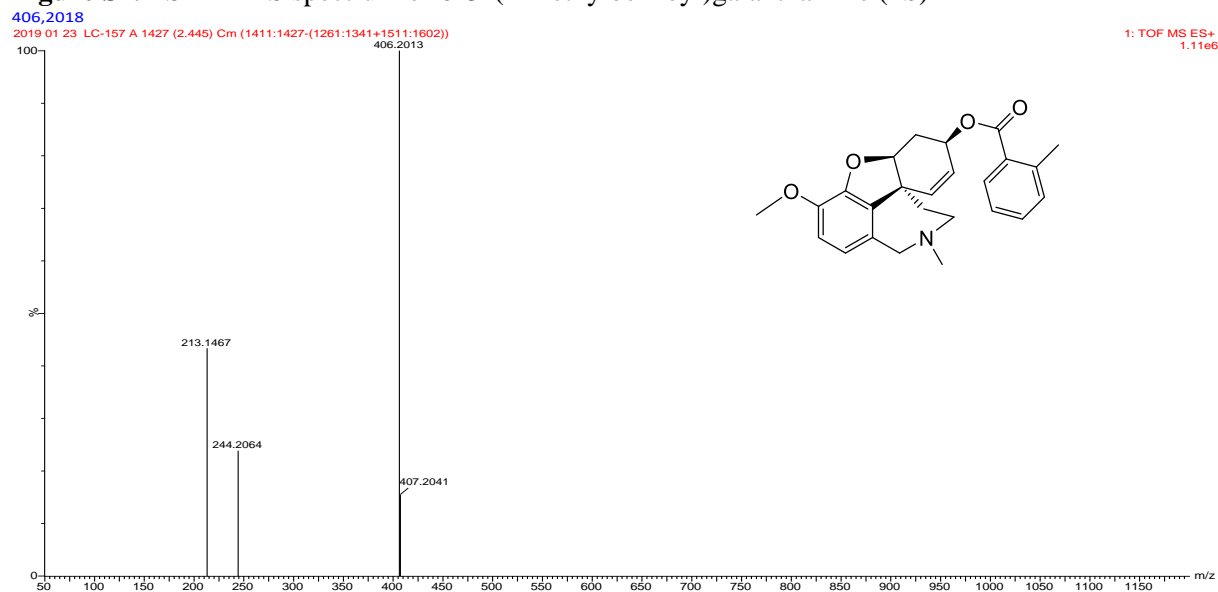

**Figure S5.**  $^1\text{H}$  NMR spectrum of 6-*O*-(2-methylbenzoyl)galanthamine (**1b**) in  $\text{CDCl}_3$

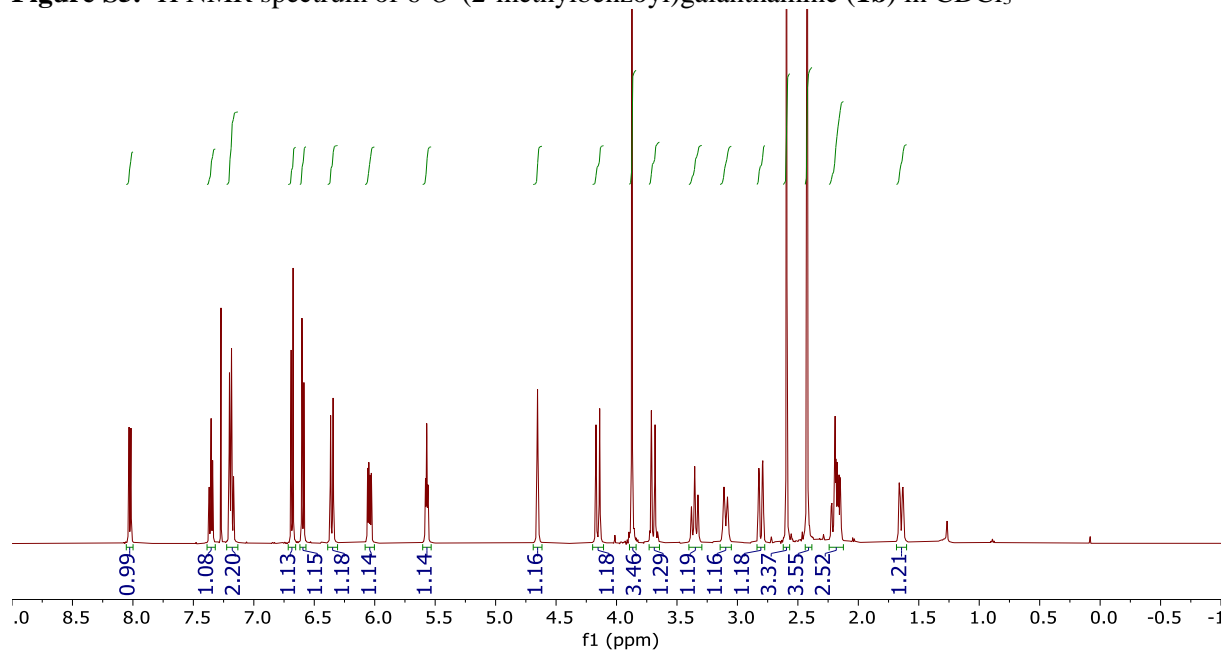

**Figure S6.**  $^{13}\text{C}$  NMR spectrum of 6-*O*-(2-methylbenzoyl)galanthamine (**1b**) in  $\text{CDCl}_3$

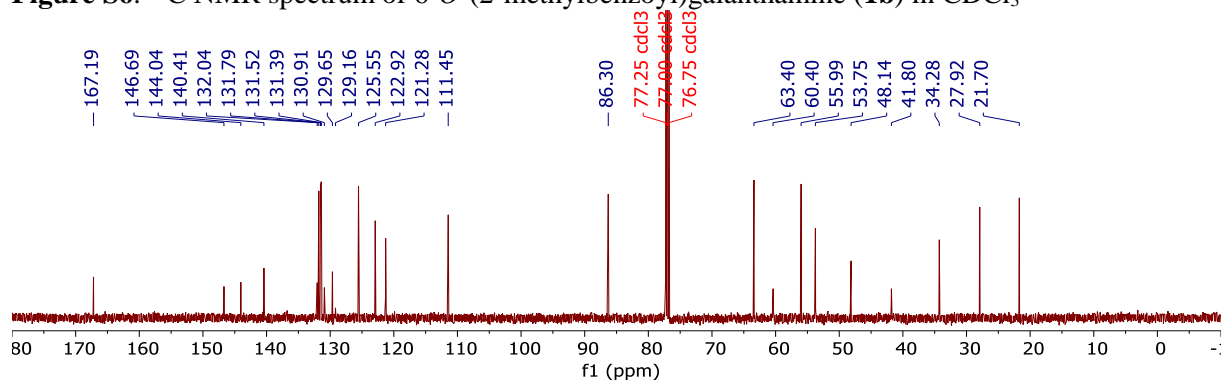

**Figure S7.** ESI-HRMS spectrum of 6-*O*-(3-methylbenzoyl)galanthamine (**1c**)

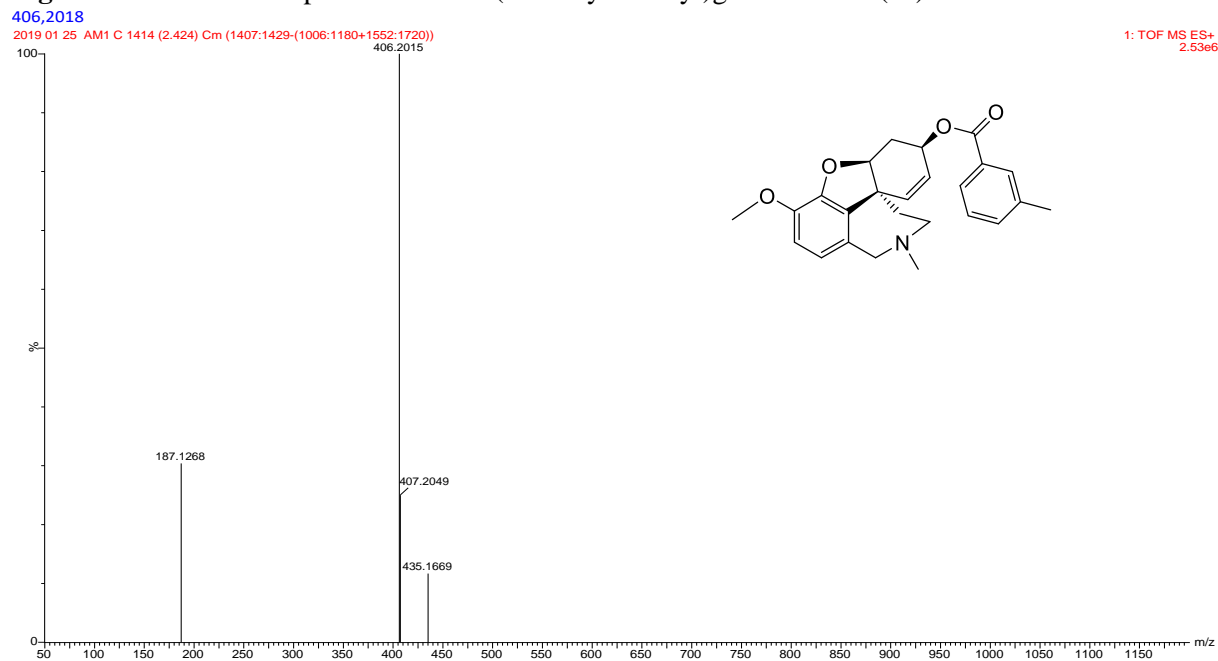

**Figure S8.**  $^1\text{H}$  NMR spectrum of 6-*O*-(3-methylbenzoyl)galanthamine (**1c**) in  $\text{CDCl}_3$

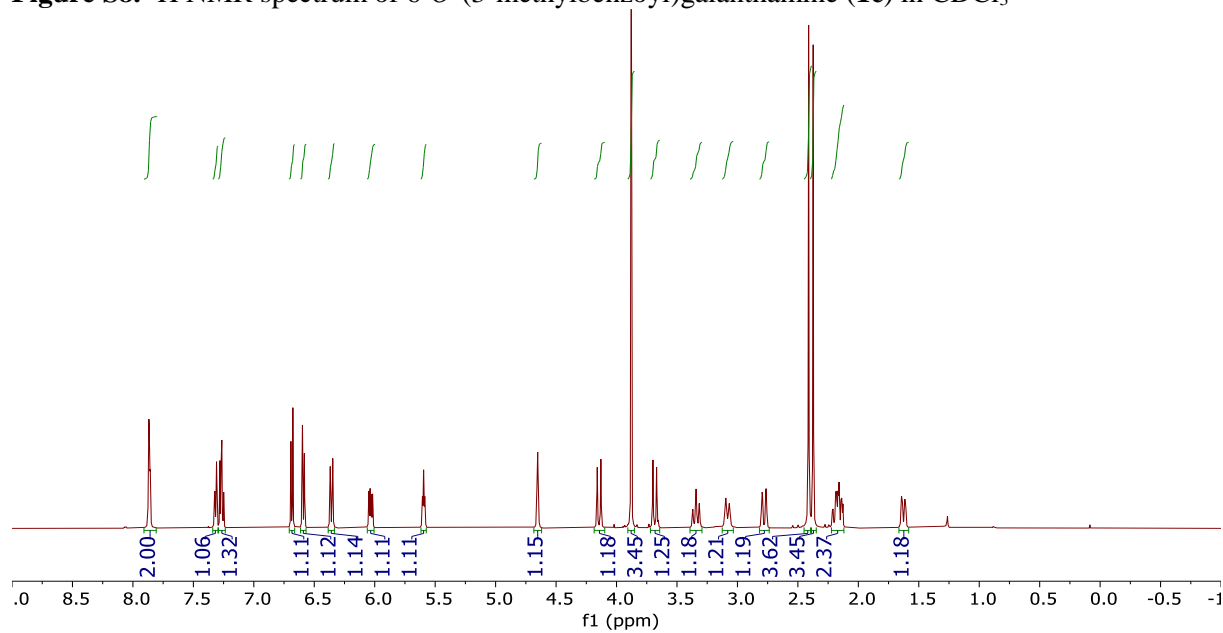

**Figure S9.**  $^{13}\text{C}$  NMR spectrum of 6-*O*-(3-methylbenzoyl)galanthamine (**1c**) in  $\text{CDCl}_3$

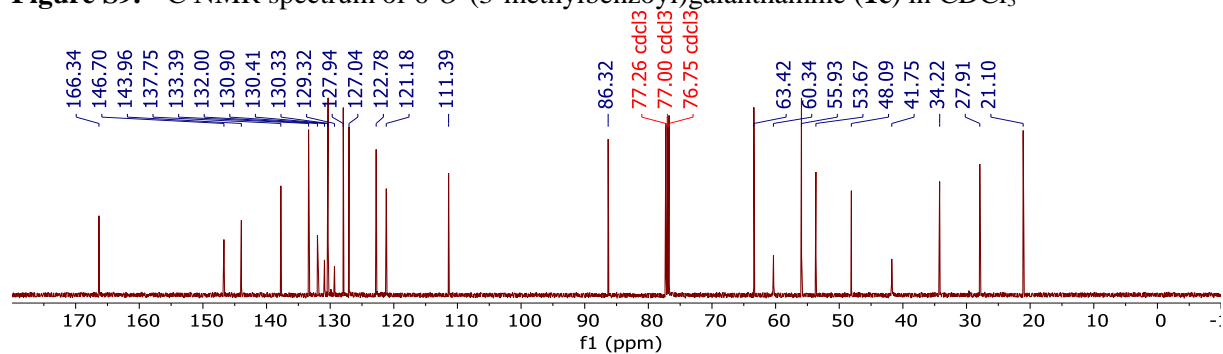

**Figure S10.** ESI-HRMS spectrum of 6-*O*-(4-methylbenzoyl)galanthamine (**1d**)

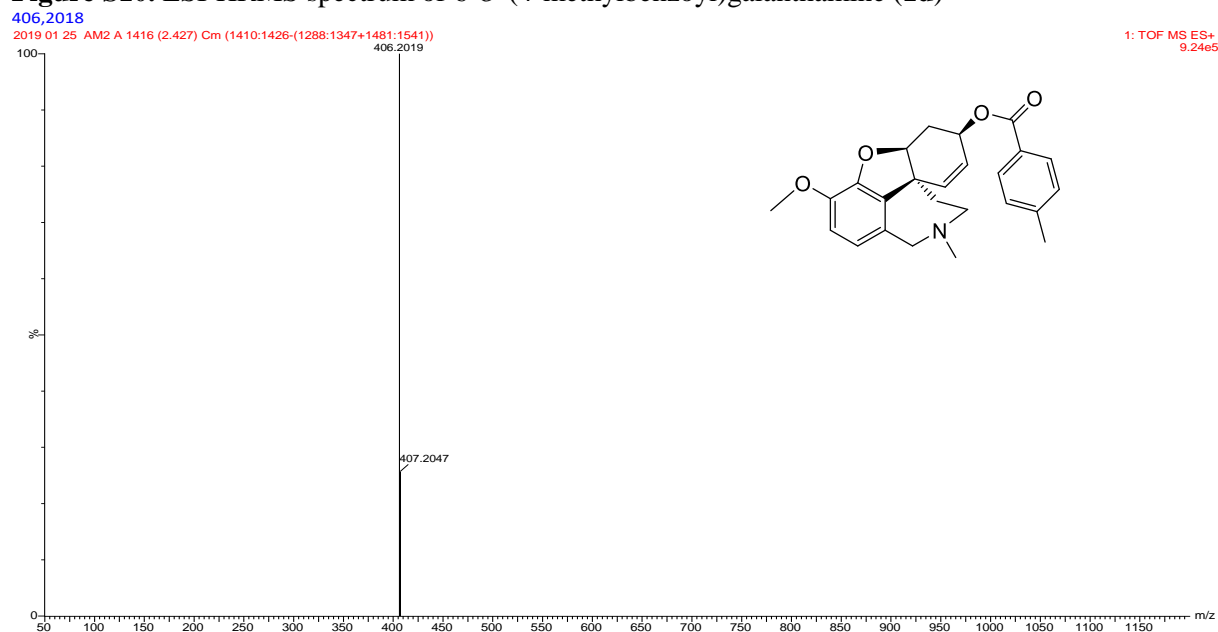

**Figure S11.**  $^1\text{H}$  NMR spectrum of 6-*O*-(4-methylbenzoyl)galanthamine (**1d**) in  $\text{CDCl}_3$

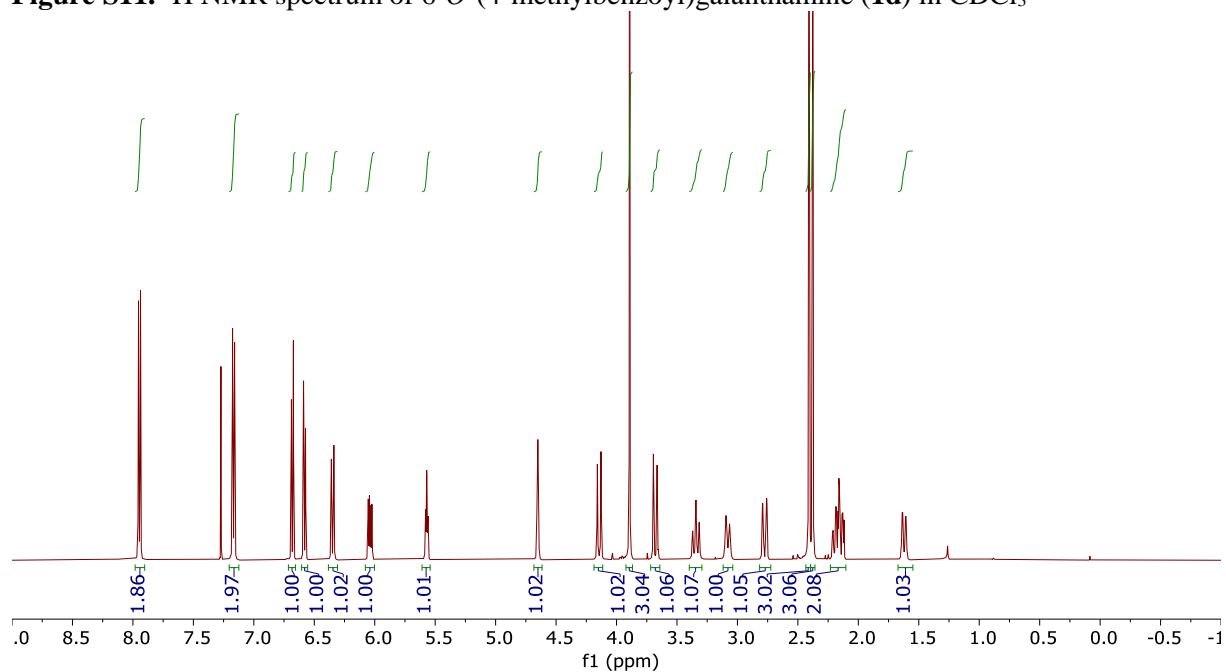

**Figure S12.**  $^{13}\text{C}$  NMR spectrum of 6-*O*-(4-methylbenzoyl)galanthamine (**1d**) in  $\text{CDCl}_3$

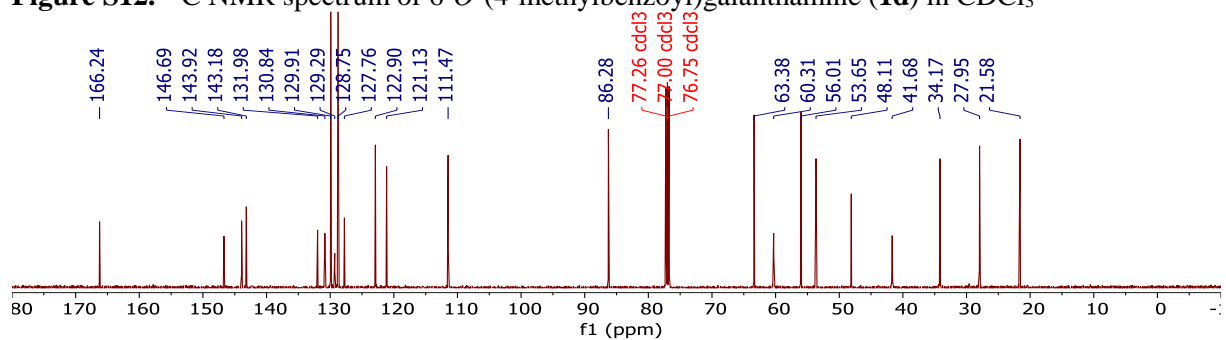



**Figure S13.** ESI-HRMS spectrum of 6-*O*-(2,3-dimethylbenzoyl)galanthamine (**1e**)

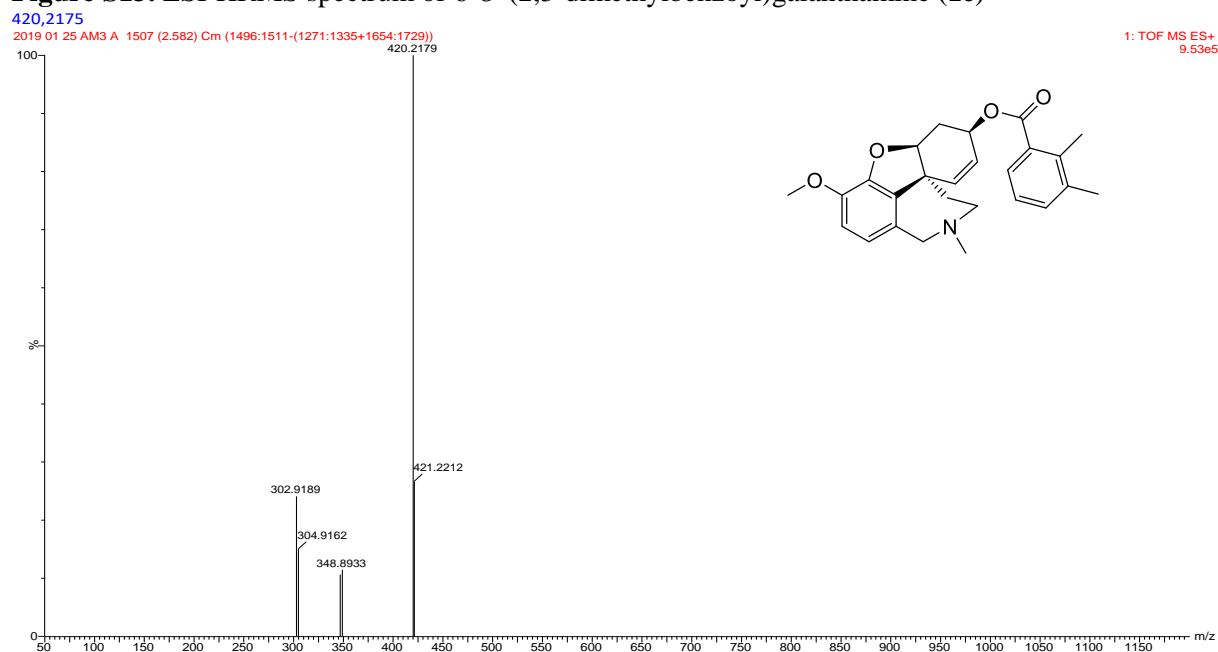

**Figure S14.**  $^1\text{H}$  NMR spectrum of 6-*O*-(2,3-dimethylbenzoyl)galanthamine (**1e**) in  $\text{CDCl}_3$

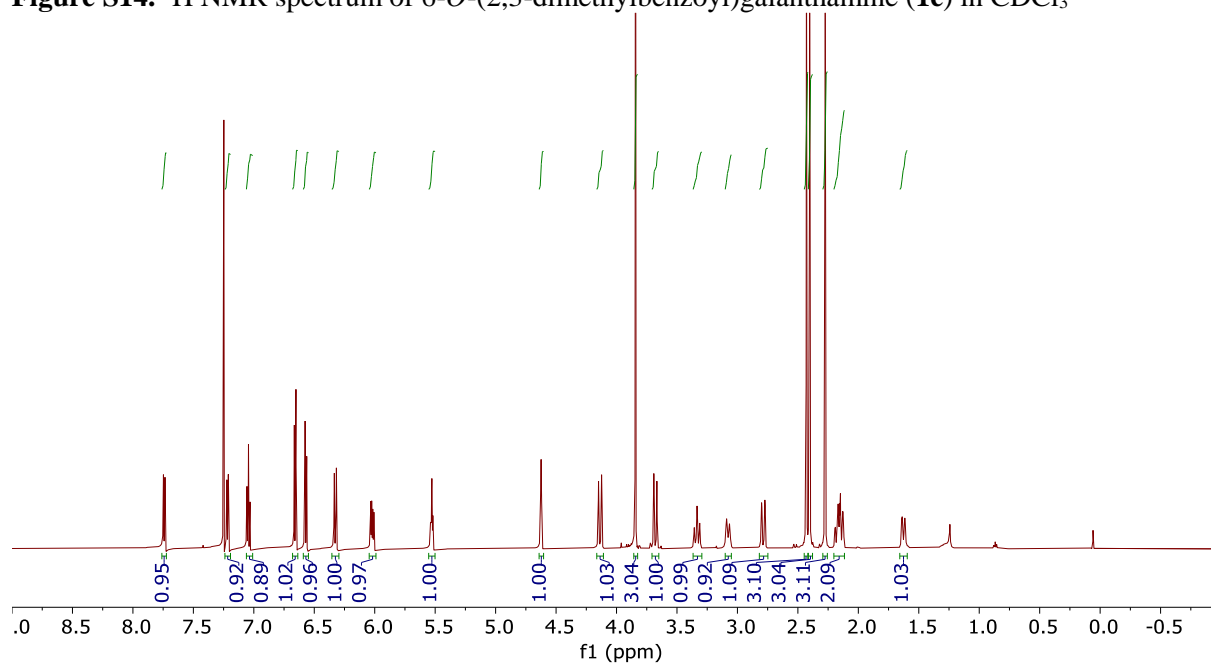

**Figure S15.**  $^{13}\text{C}$  NMR spectrum of 6-*O*-(2,3-dimethylbenzoyl)galanthamine (**1e**) in  $\text{CDCl}_3$

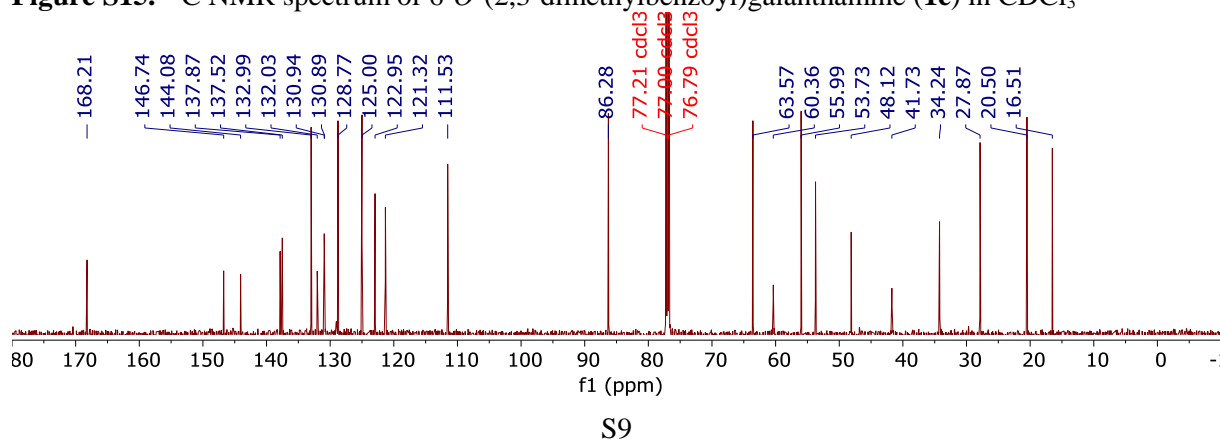

**Figure S16.** ESI-HRMS spectrum of 6-*O*-(3,5-dimethylbenzoyl)galanthamine (**1f**)

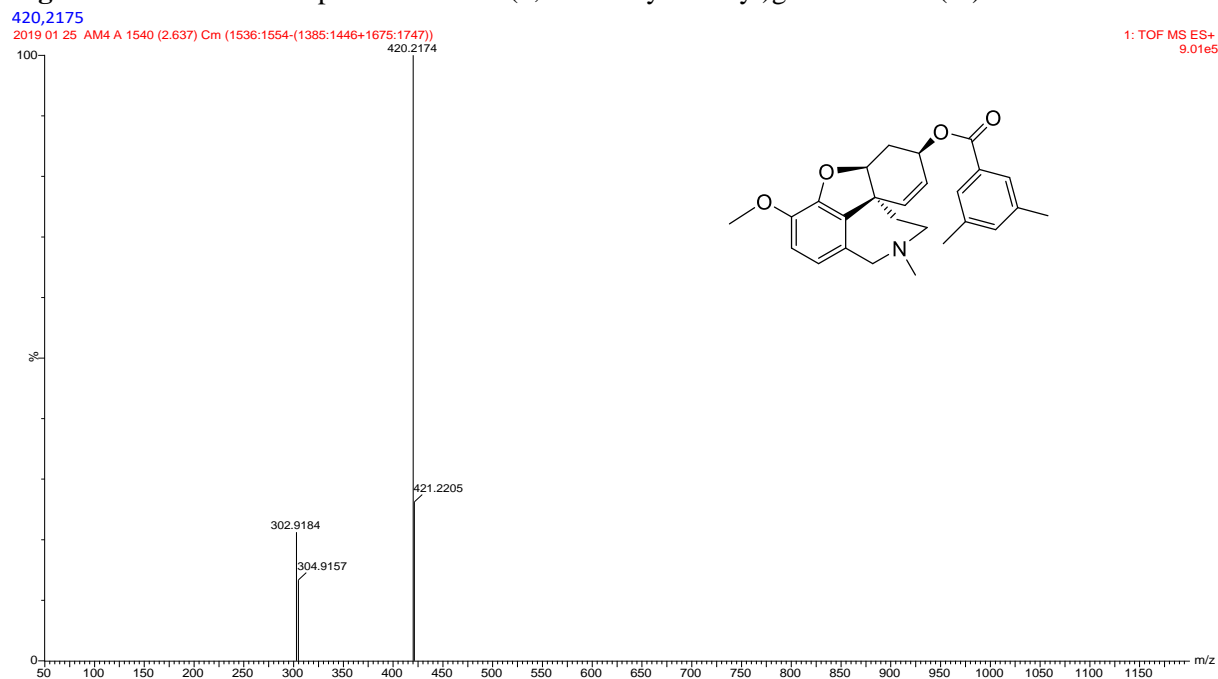

**Figure S17.** <sup>1</sup>H NMR spectrum of 6-*O*-(3,5-dimethylbenzoyl)galanthamine (**1f**) in CDCl<sub>3</sub>

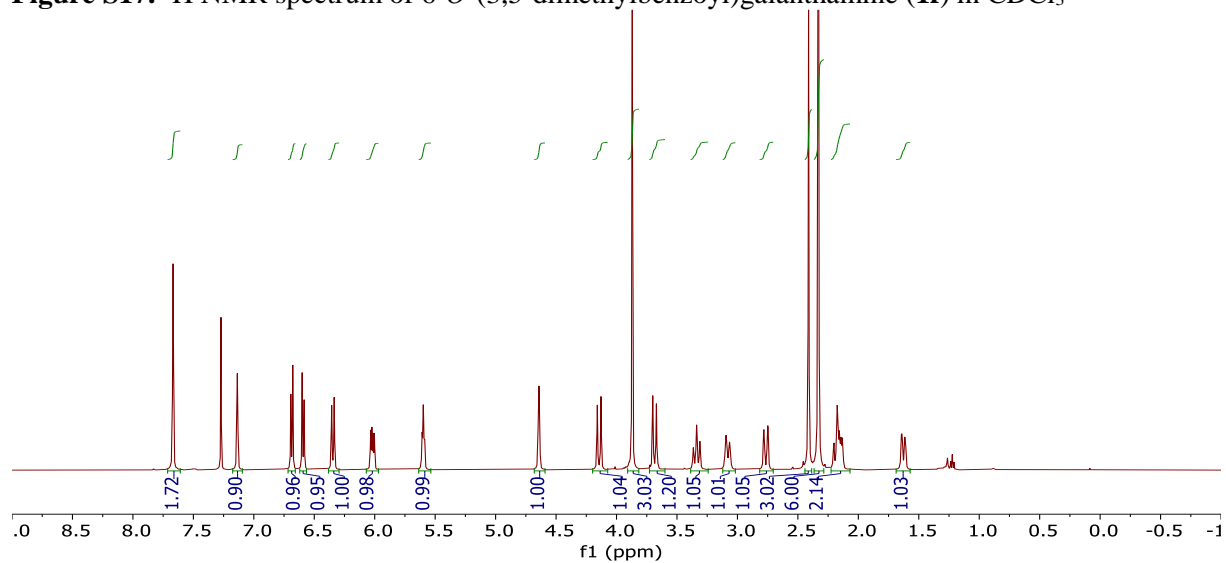

**Figure S18.** <sup>13</sup>C NMR spectrum of 6-*O*-(3,5-dimethylbenzoyl)galanthamine (**1f**) in CDCl<sub>3</sub>

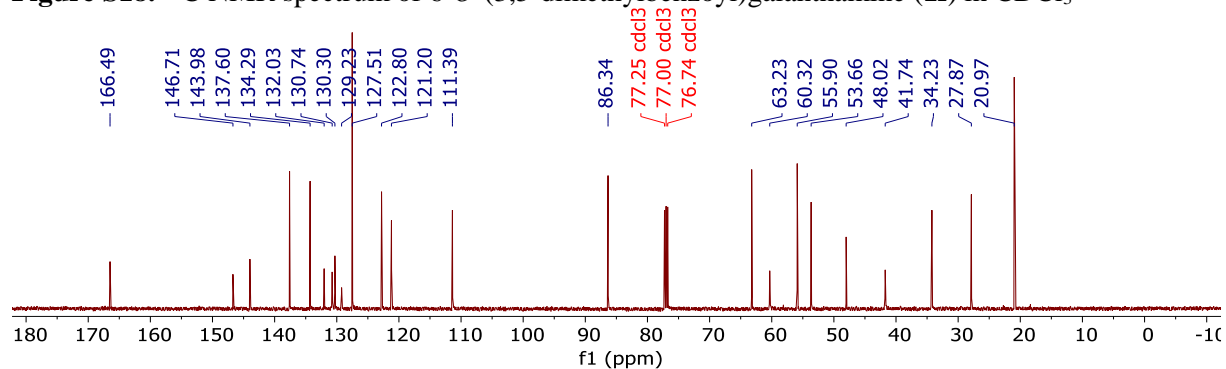

**Figure S19.** ESI-HRMS spectrum of 6-*O*-(2,4,6-trimethylbenzoyl)galanthamine (**1g**)

434.2326

2021 01 12 AM 37A 1583 (2.729) Cm (1571:1609-[1465:1535+1678:1738])

1: TOF MS ES+  
2.34e6

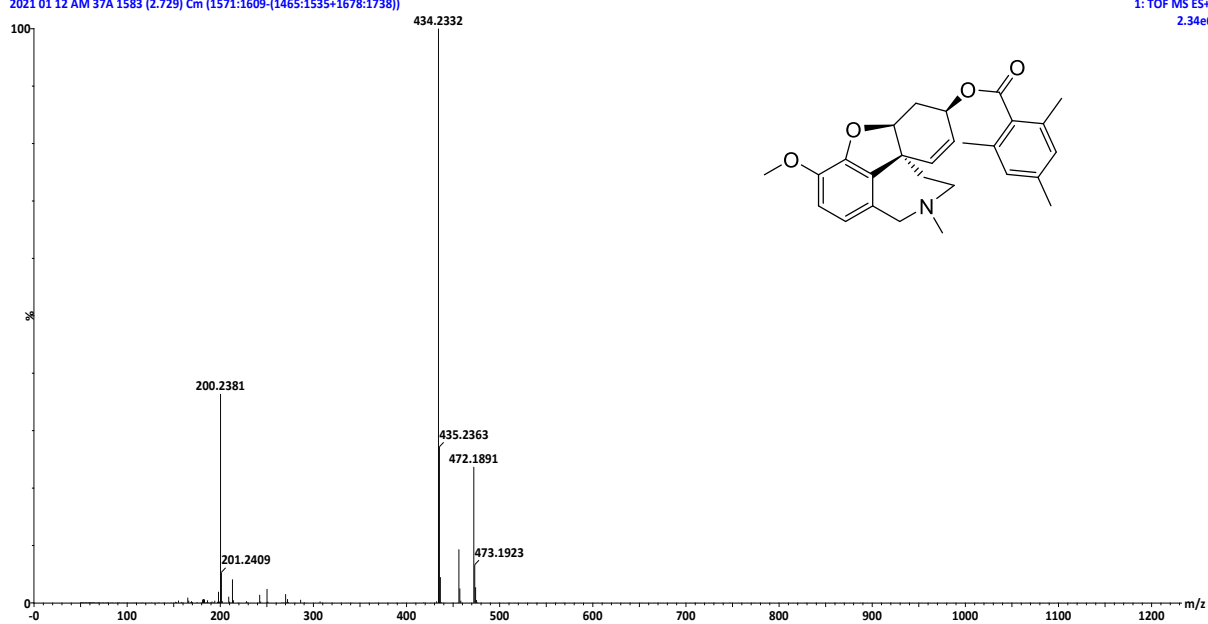

**Figure S20.**  $^1\text{H}$  NMR spectrum of 6-*O*-(2,4,6-trimethylbenzoyl)galanthamine (**1g**) in  $\text{CDCl}_3$

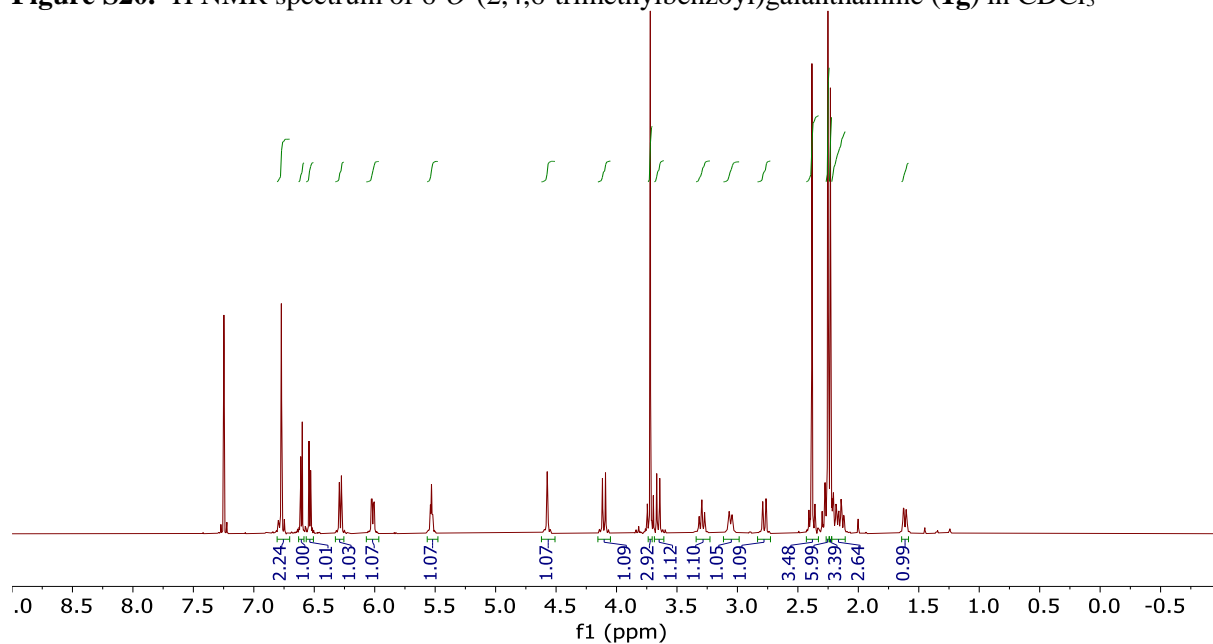

**Figure S21.**  $^{13}\text{C}$  NMR spectrum of 6-*O*-(2,4,6-trimethylbenzoyl)galanthamine (**1g**) in  $\text{CDCl}_3$

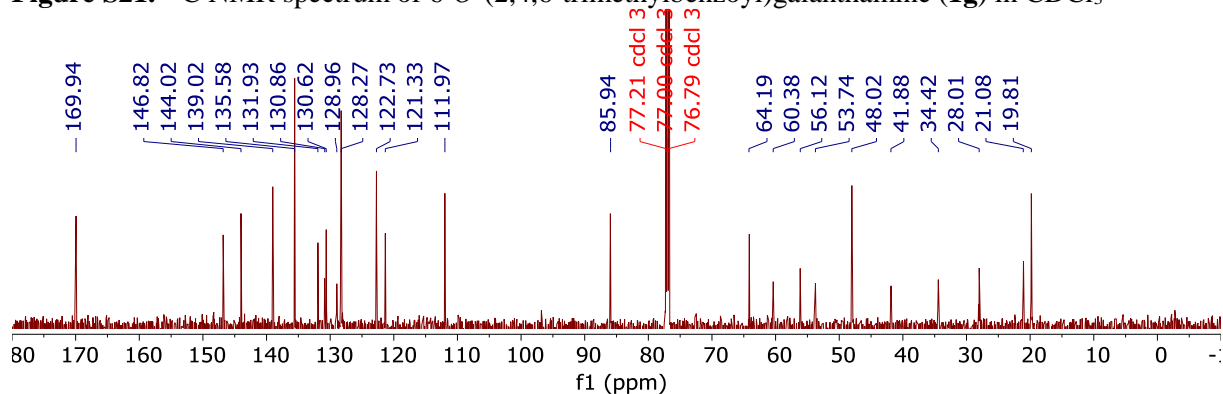

**Figure S22.** ESI-HRMS spectrum of 6-*O*-(4-*tert*-butylbenzoyl)galanthamine (**1h**)

448.2482

2021 01 12 AM 36A 1752 (3.019) Cm (1737:1787-(1546:1604+1888:1946))

1: TOF MS ES+  
4.95e6

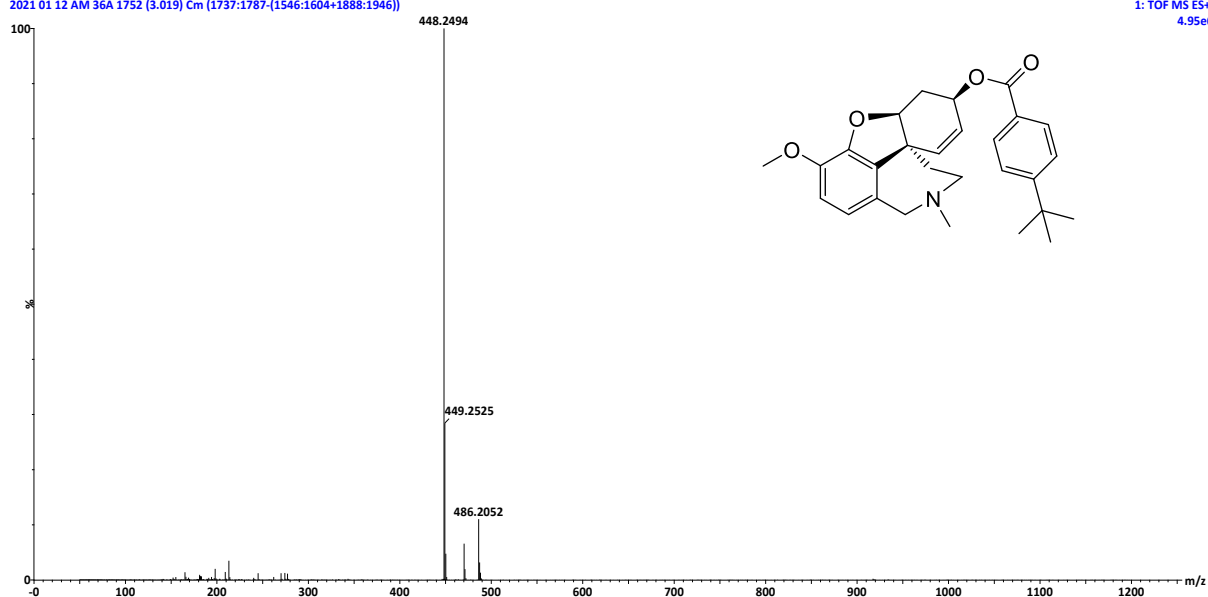

**Figure S23.**  $^1\text{H}$  NMR spectrum of 6-*O*-(4-*tert*-butylbenzoyl)galanthamine (**1h**) in  $\text{CDCl}_3$

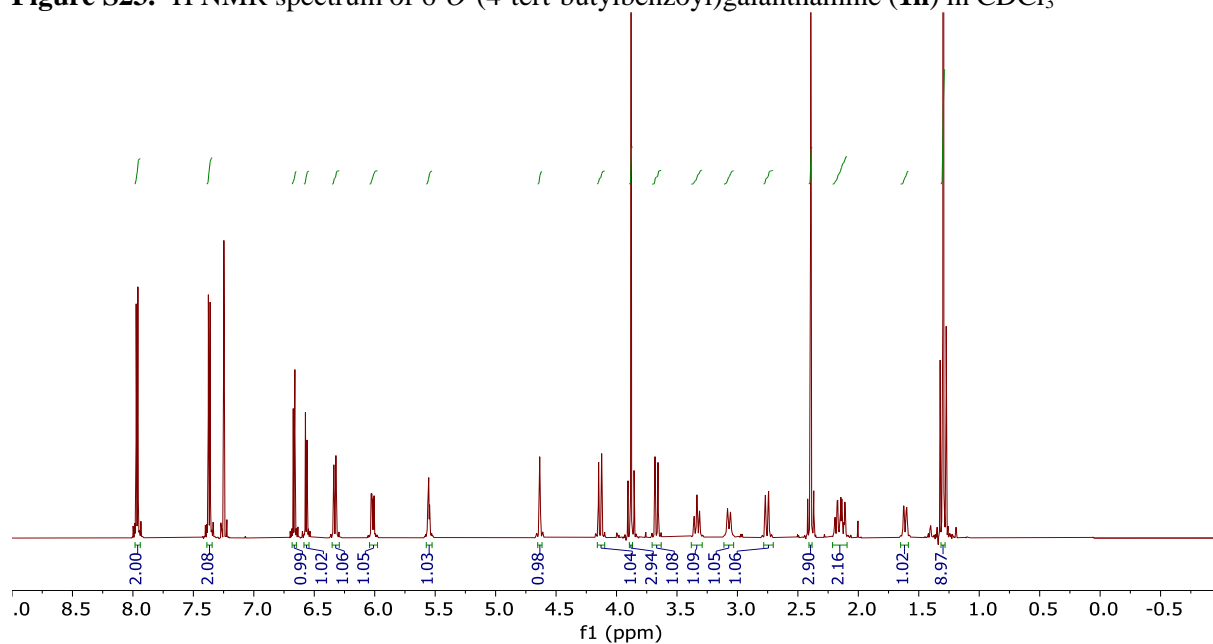

**Figure S24.**  $^{13}\text{C}$  NMR spectrum of 6-*O*-(4-*tert*-butylbenzoyl)galanthamine (**1h**) in  $\text{CDCl}_3$

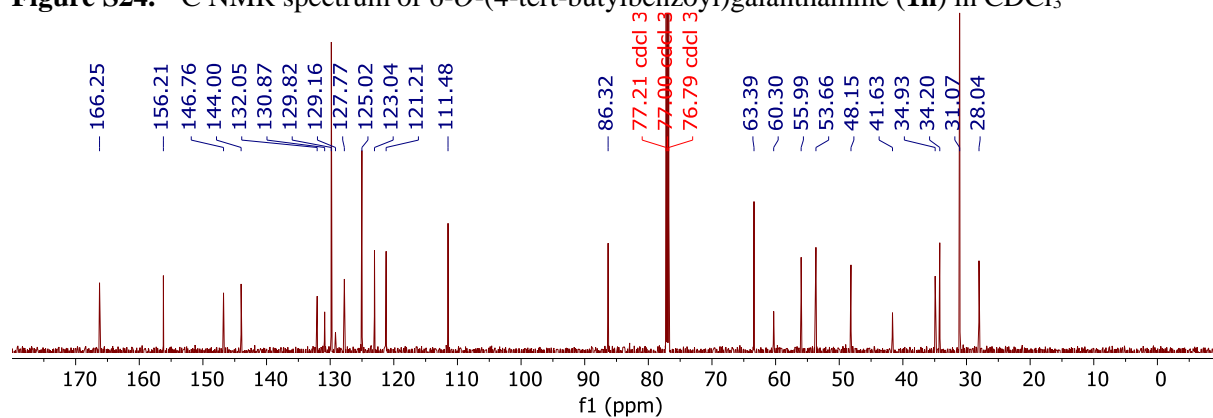

**Figure S25.** ESI-HRMS spectrum of 6-*O*-(4-butylbenzoyl)galanthamine (**1i**)

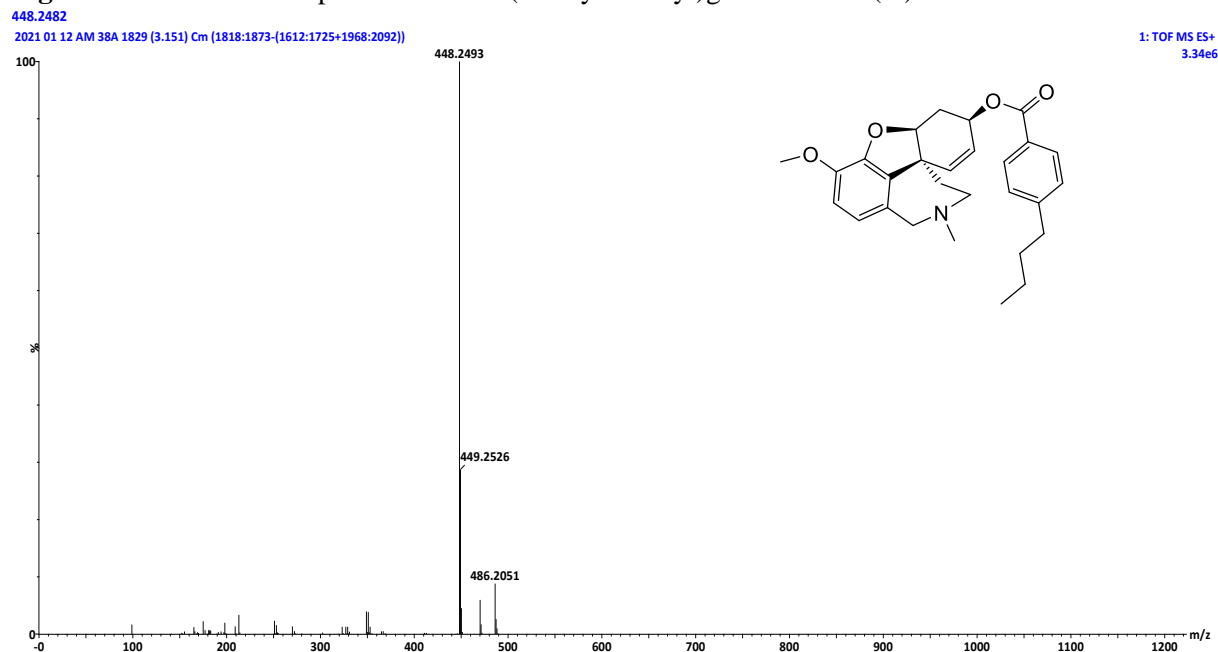

**Figure S26.**  $^1\text{H}$  NMR spectrum of 6-*O*-(4-butylbenzoyl)galanthamine (**1i**) in  $\text{CDCl}_3$

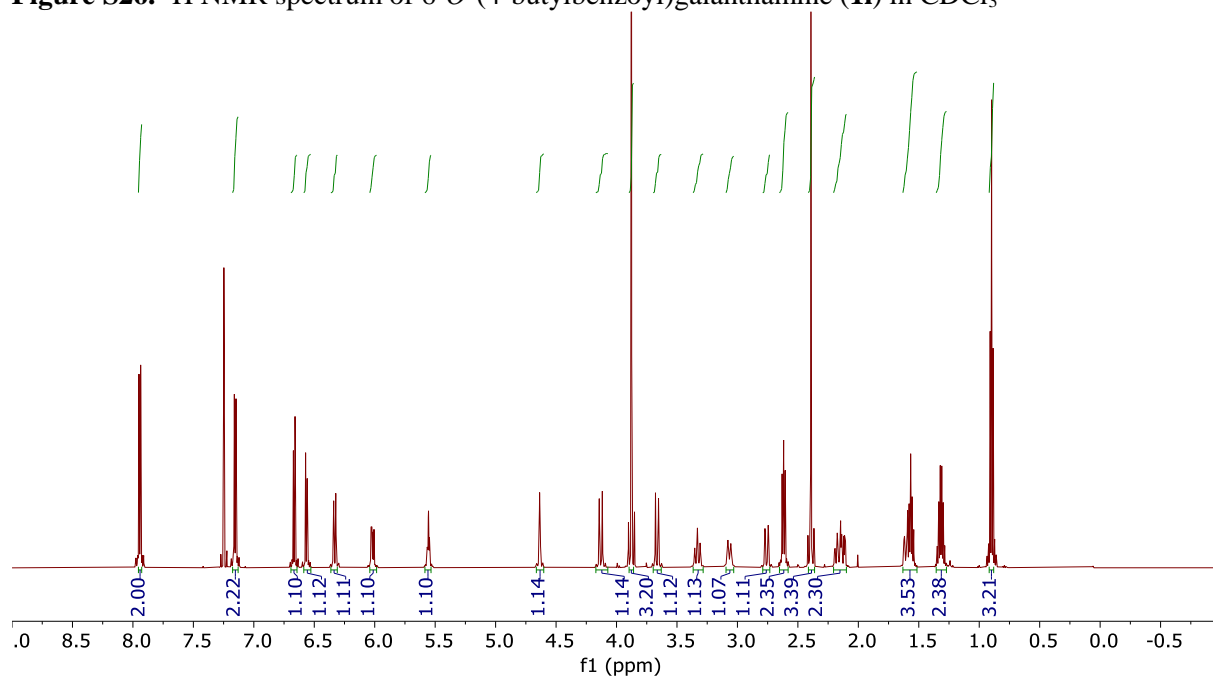

**Figure S27.**  $^{13}\text{C}$  NMR spectrum of 6-*O*-(4-butylbenzoyl)galanthamine (**1i**) in  $\text{CDCl}_3$

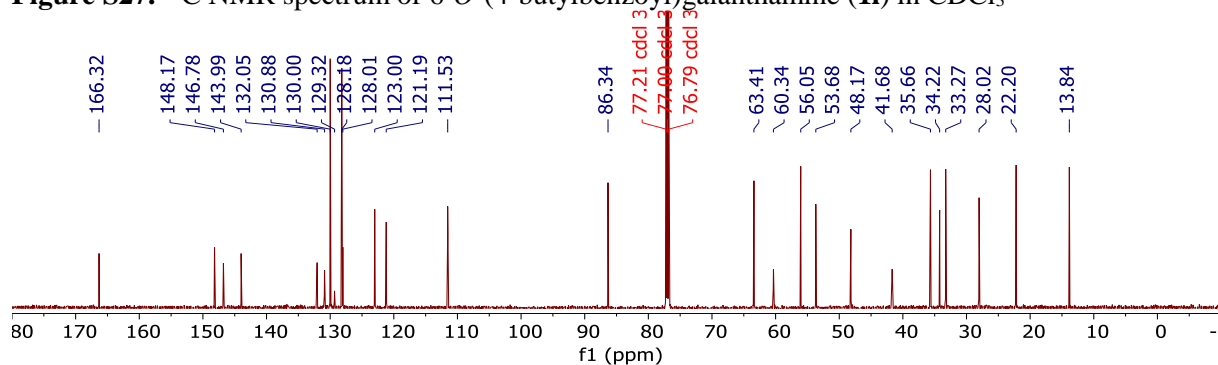

**Figure S28.** ESI-HRMS spectrum of 6-*O*-(2-methoxybenzoyl)galanthamine (**1j**)

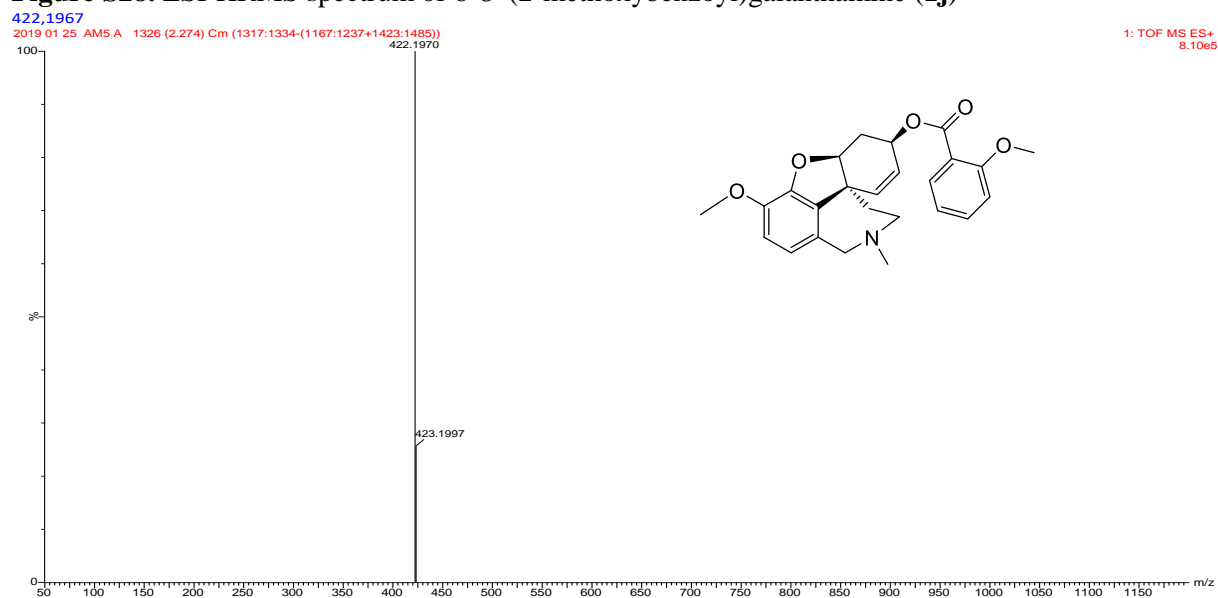

**Figure S29.**  $^1\text{H}$  NMR spectrum of 6-*O*-(2-methoxybenzoyl)galanthamine (**1j**) in  $\text{CDCl}_3$

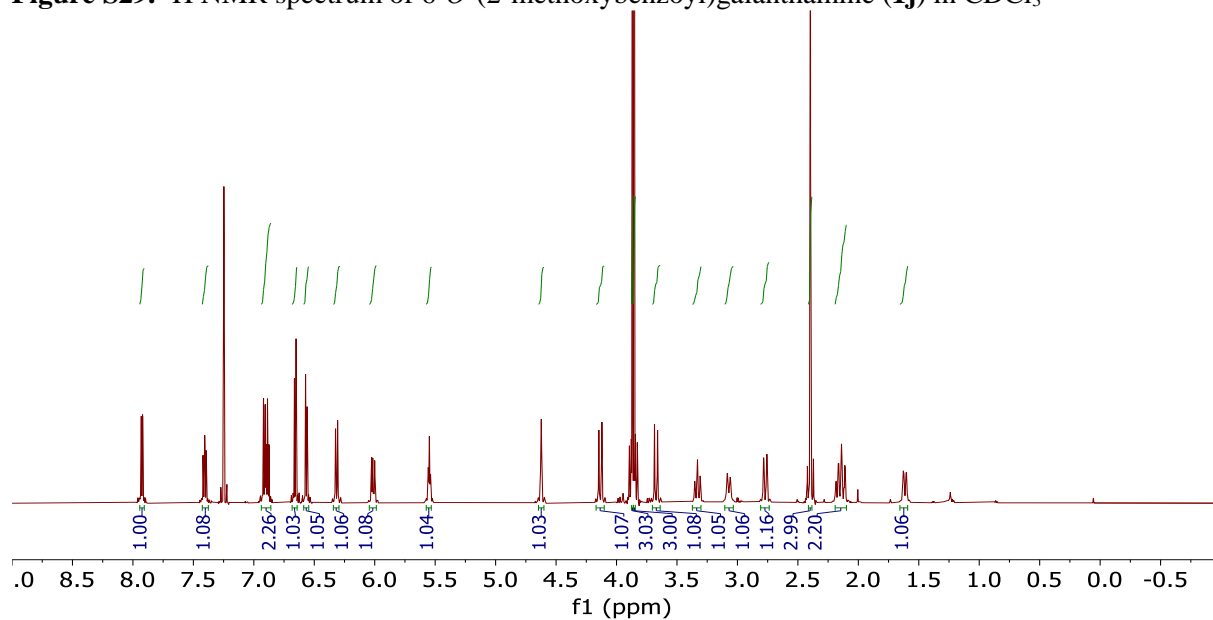

**Figure S30.**  $^{13}\text{C}$  NMR spectrum of 6-*O*-(2-methoxybenzoyl)galanthamine (**1j**) in  $\text{CDCl}_3$

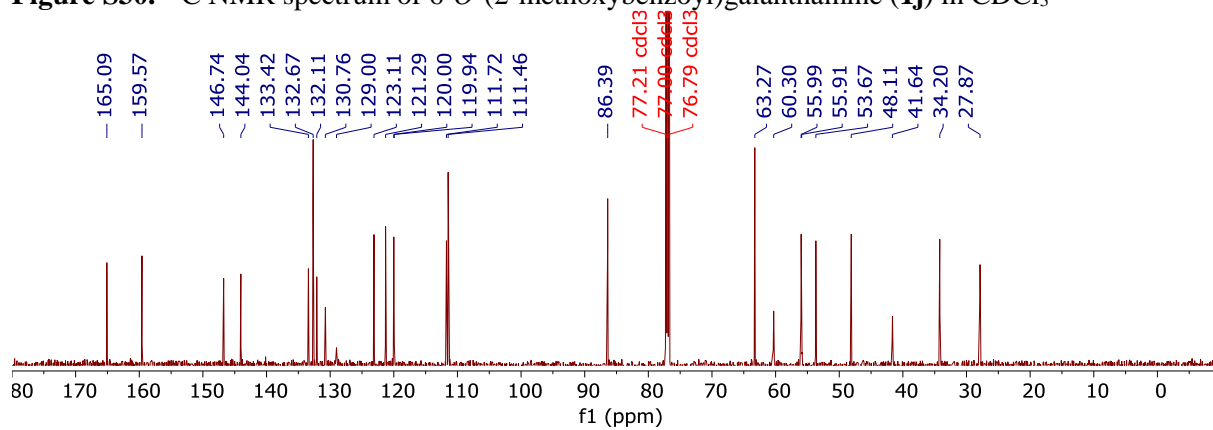

**Figure S31.** ESI-HRMS spectrum of 6-*O*-(3-methoxybenzoyl)galanthamine (**1k**)

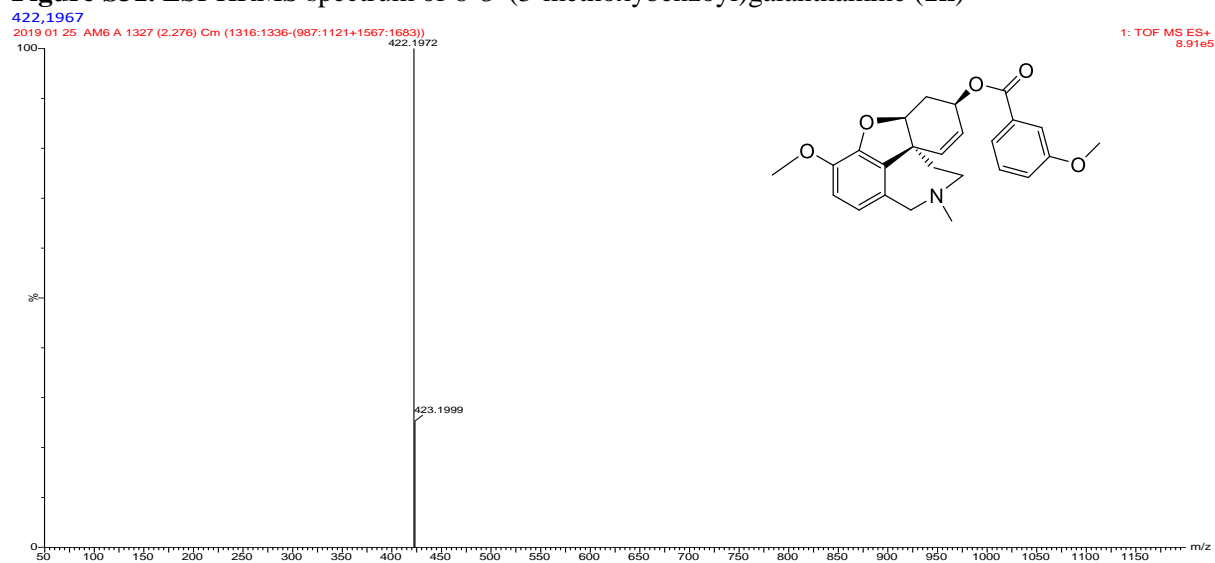

**Figure S32.**  $^1\text{H}$  NMR spectrum of 6-*O*-(3-methoxybenzoyl)galanthamine (**1k**) in  $\text{CDCl}_3$

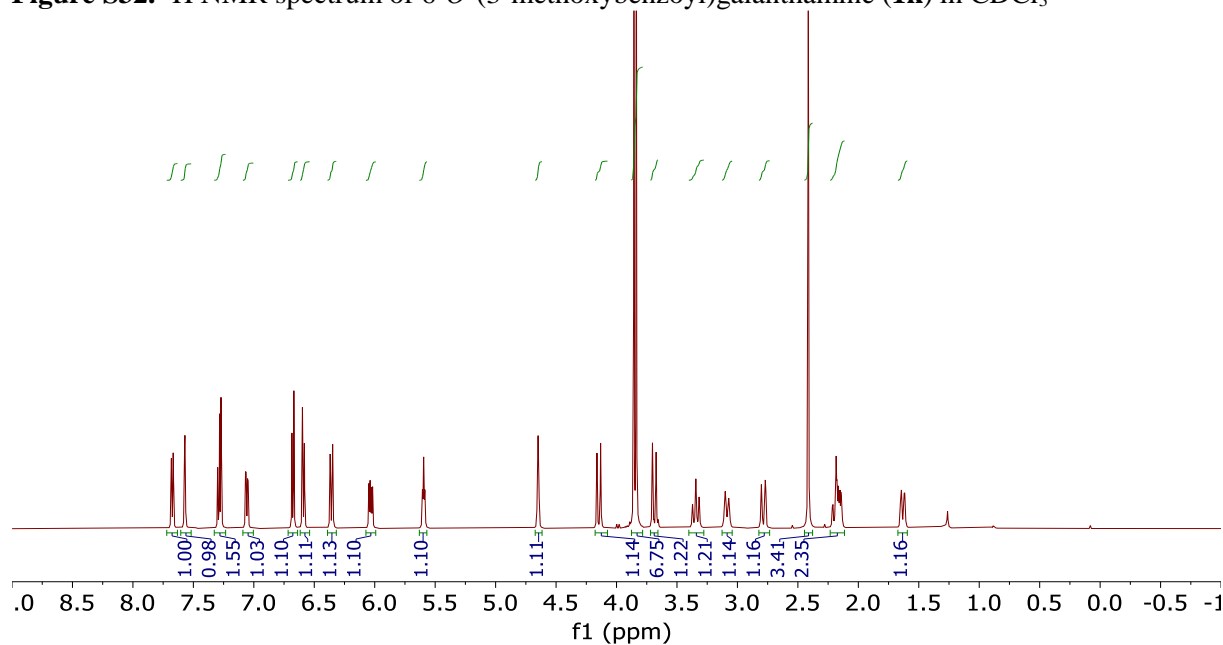

**Figure S33.**  $^{13}\text{C}$  NMR spectrum of 6-*O*-(3-methoxybenzoyl)galanthamine (**1k**) in  $\text{CDCl}_3$

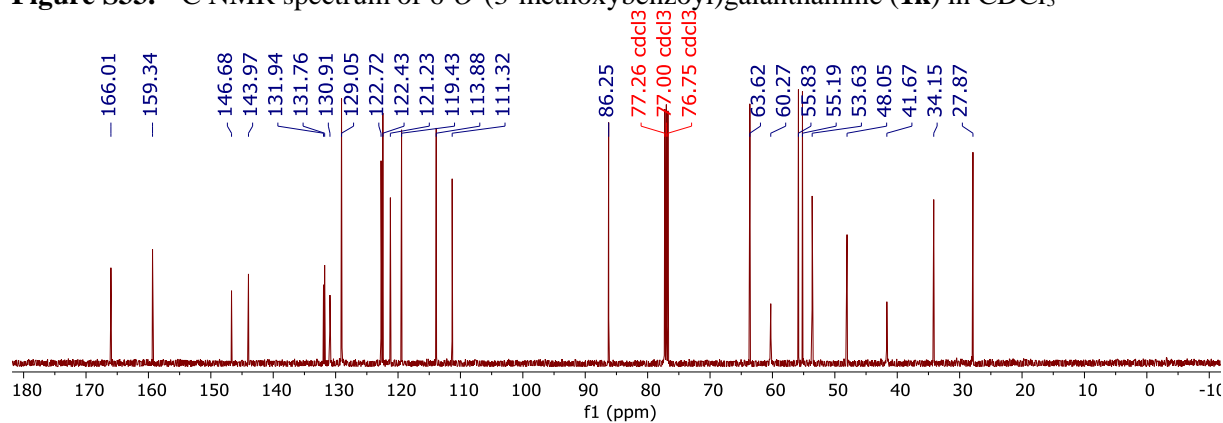

**Figure S34.** ESI-HRMS spectrum of 6-*O*-(4-methoxybenzoyl)galanthamine (**11**)

422.1967

2019 01 25 AM7 A 1296 (2.224) Cm (1294:1308-(1185:1233+1413:1454))

1: TOF MS ES+  
6.07e5

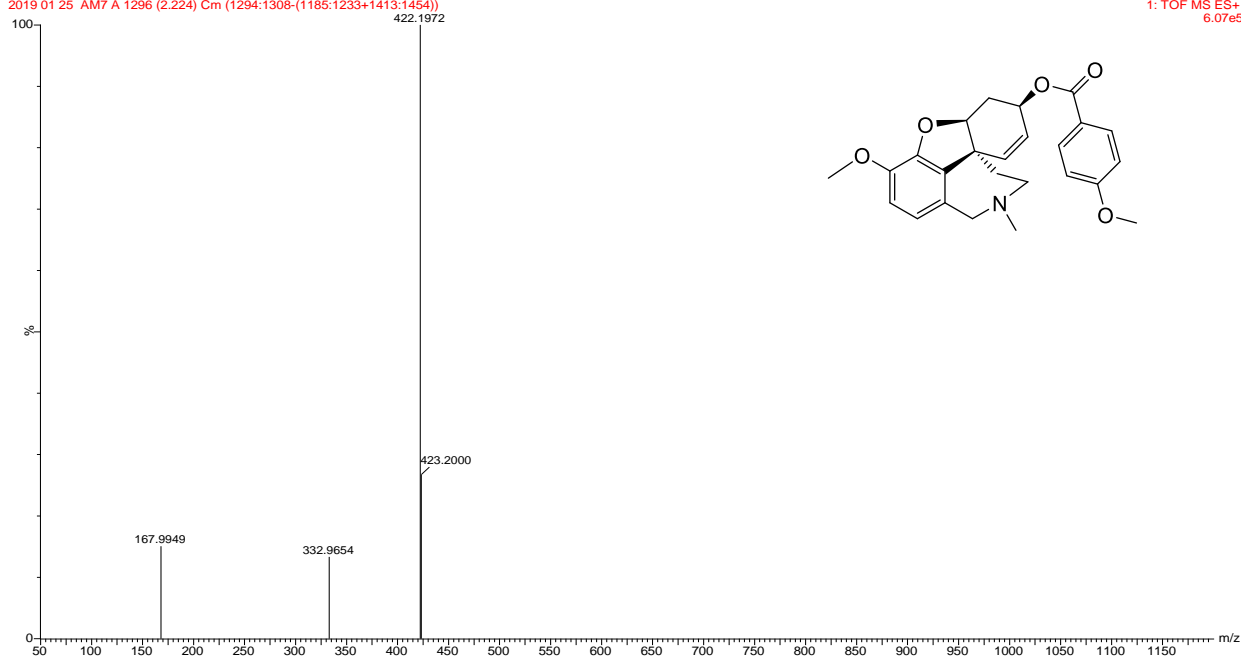

**Figure S35.** <sup>1</sup>H NMR spectrum of 6-*O*-(4-methoxybenzoyl)galanthamine (**11**) in CDCl<sub>3</sub>

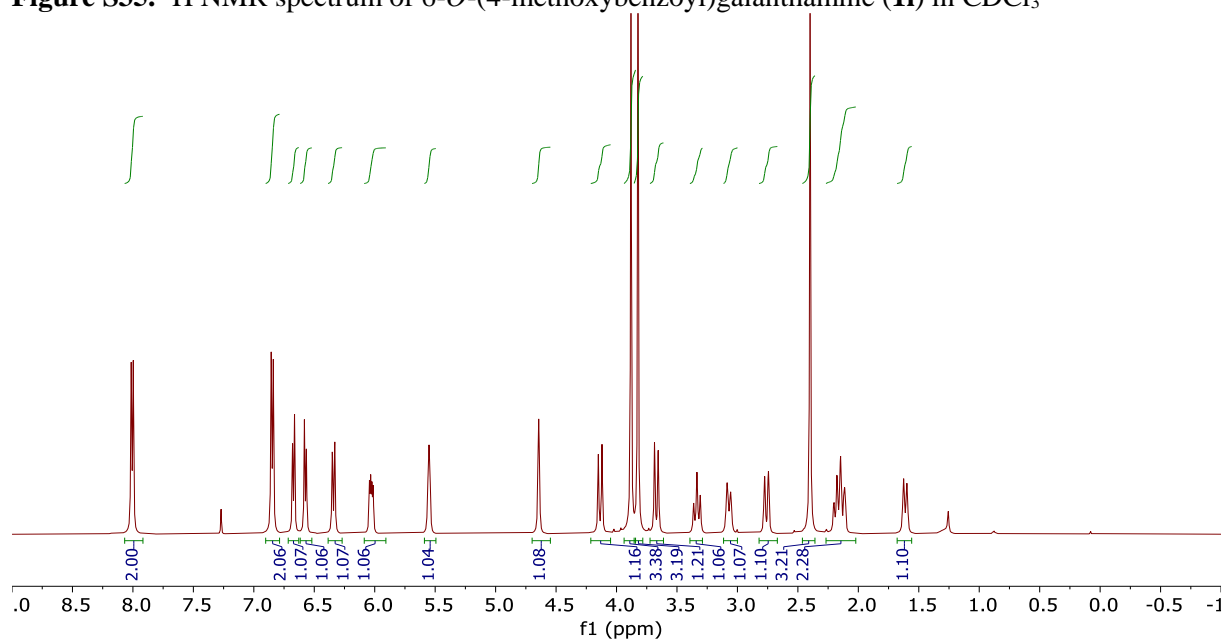

**Figure S36.** <sup>13</sup>C NMR spectrum of 6-*O*-(4-methoxybenzoyl)galanthamine (**11**) in CDCl<sub>3</sub>

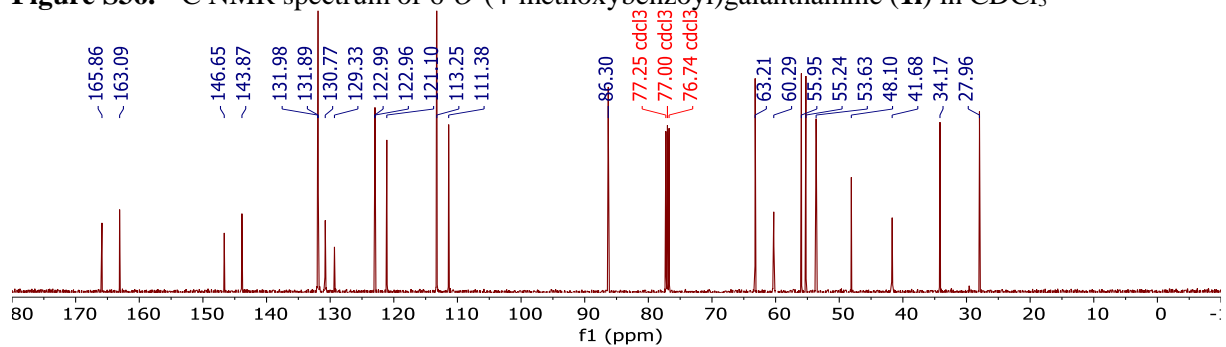



**Figure S37.** ESI-HRMS spectrum of 6-*O*-(3,4-dimethoxybenzoyl)galanthamine (**1m**)

452,2073

2019 01 25 AM9 A 1163 (1.995) Cm (1163:1179-(863:946+1415:1492))

1: TOF MS ES+  
5.41e5

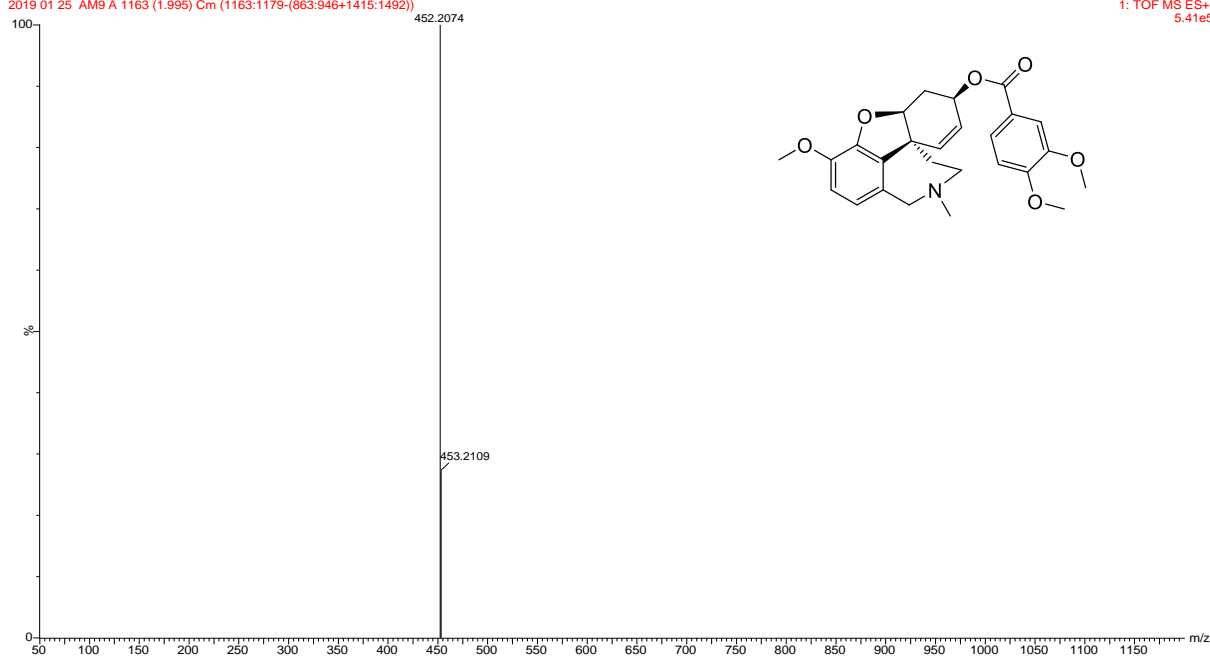

**Figure S38.**  $^1\text{H}$  NMR spectrum of 6-*O*-(3,4-dimethoxybenzoyl)galanthamine (**1m**) in  $\text{CDCl}_3$

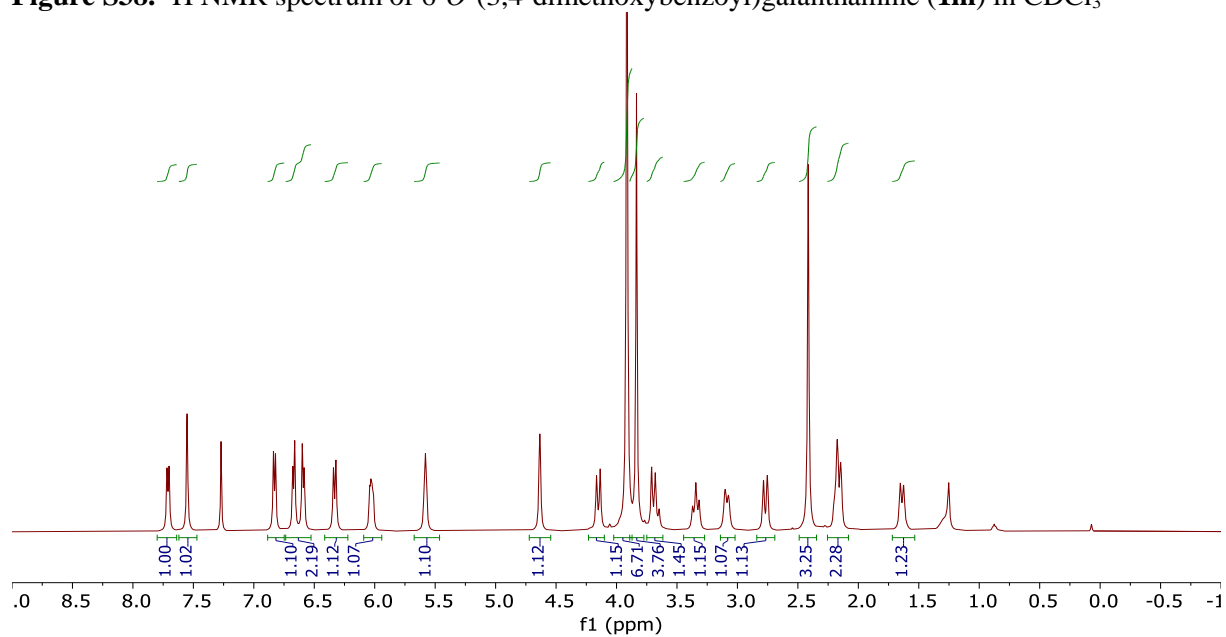

**Figure S39.**  $^{13}\text{C}$  NMR spectrum of 6-*O*-(3,4-dimethoxybenzoyl)galanthamine (**1m**) in  $\text{CDCl}_3$

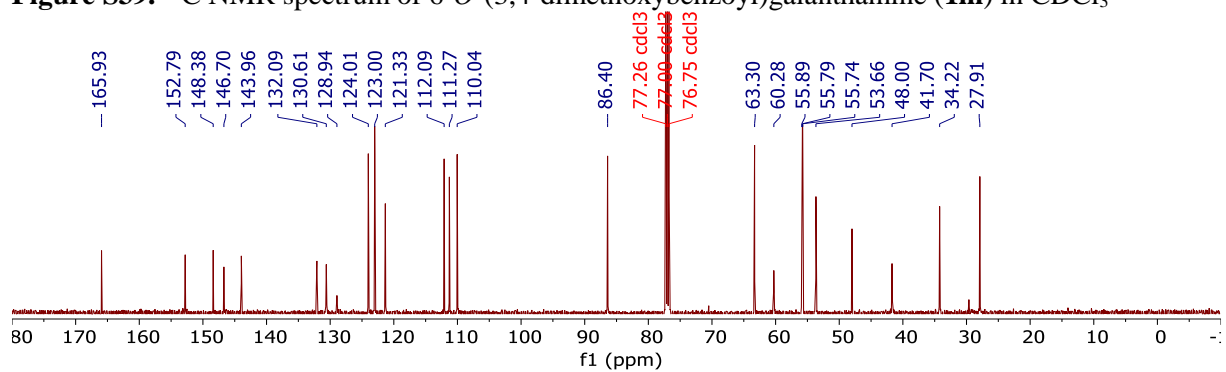

**Figure S40.** ESI-HRMS spectrum of 6-*O*-(3,5-dimethoxybenzoyl)galanthamine (**1n**)

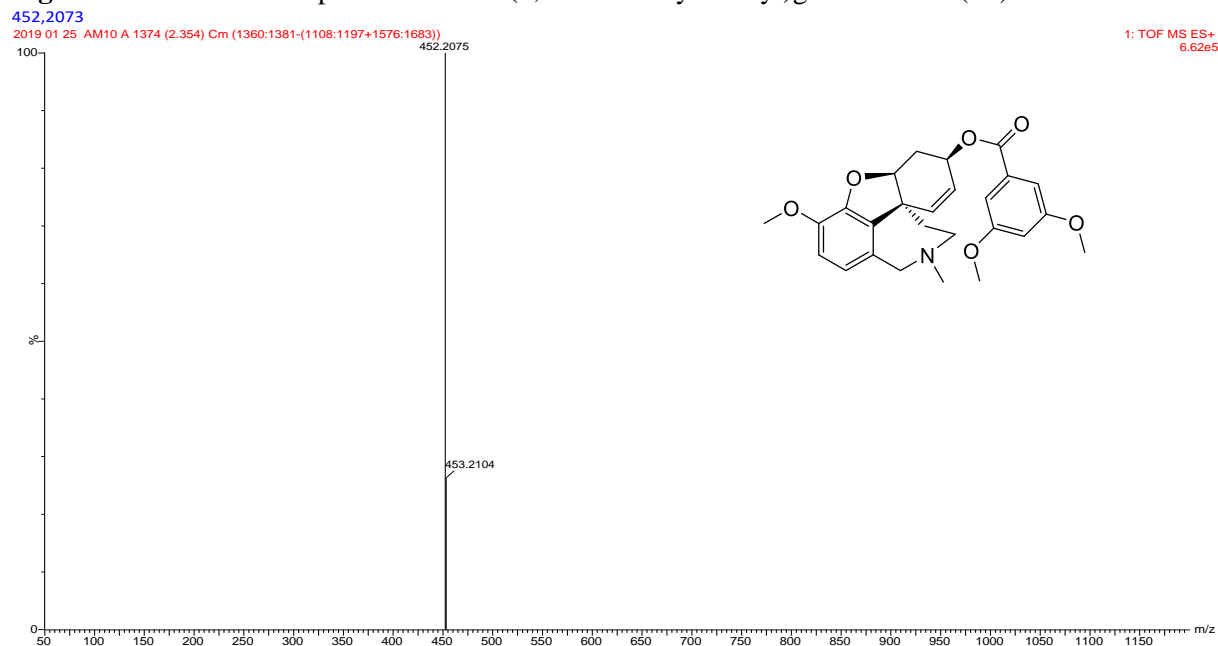

**Figure S41.**  $^1\text{H}$  NMR spectrum of 6-*O*-(3,5-dimethoxybenzoyl)galanthamine (**1n**) in  $\text{CDCl}_3$

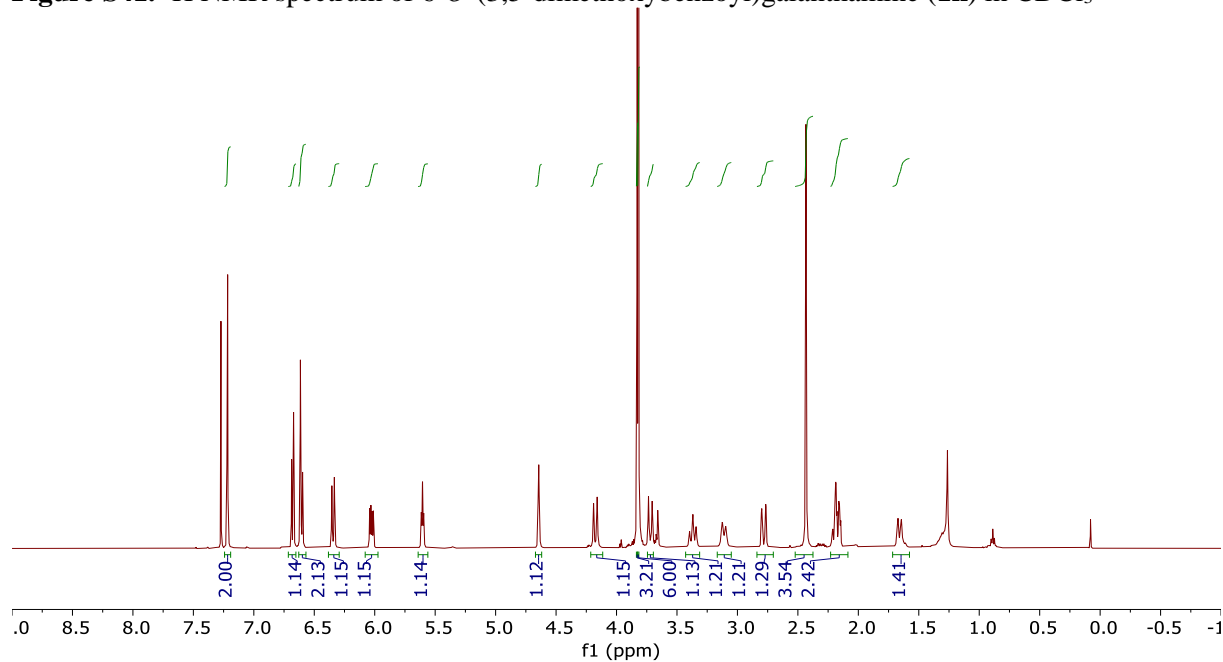

**Figure S42.**  $^{13}\text{C}$  NMR spectrum of 6-*O*-(3,5-dimethoxybenzoyl)galanthamine (**1n**) in  $\text{CDCl}_3$

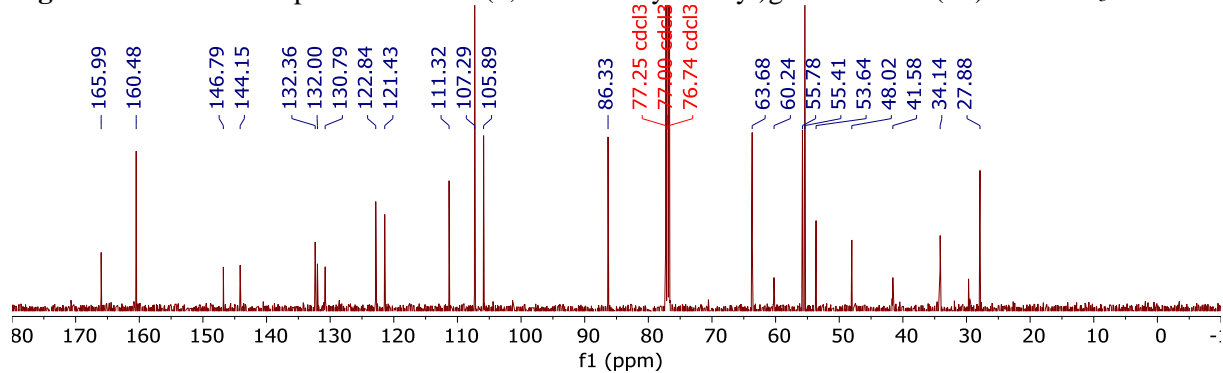

**Figure S43.** ESI-HRMS spectrum of 6-*O*-(3,4,5-trimethoxybenzoyl)galanthamine (**1o**)

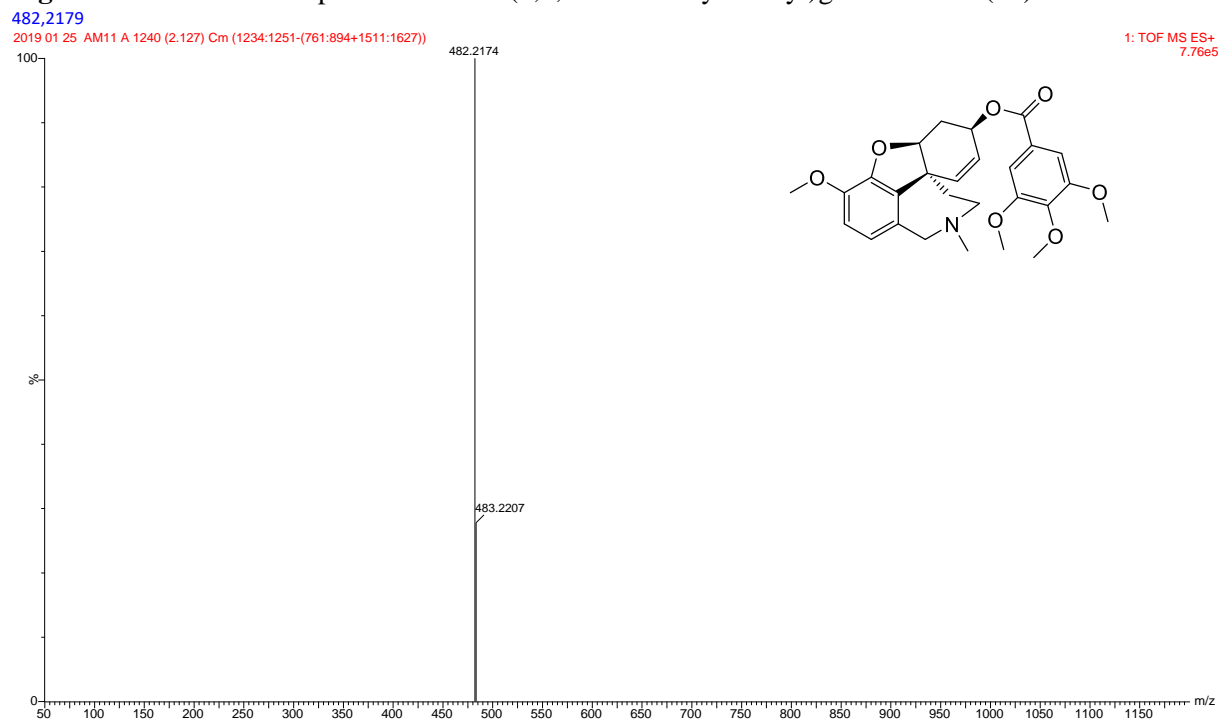

**Figure S44.**  $^1\text{H}$  NMR spectrum of 6-*O*-(3,4,5-trimethoxybenzoyl)galanthamine (**1o**) in  $\text{CDCl}_3$

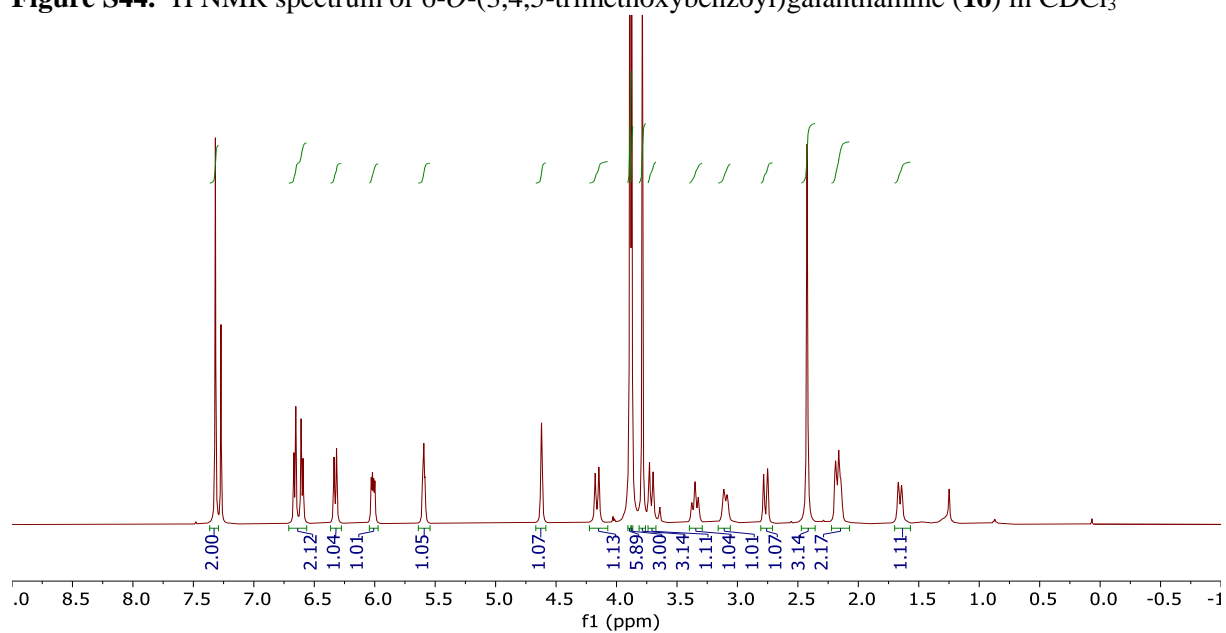

**Figure S45.**  $^{13}\text{C}$  NMR spectrum of 6-*O*-(3,4,5-trimethoxybenzoyl)galanthamine (**1o**) in  $\text{CDCl}_3$

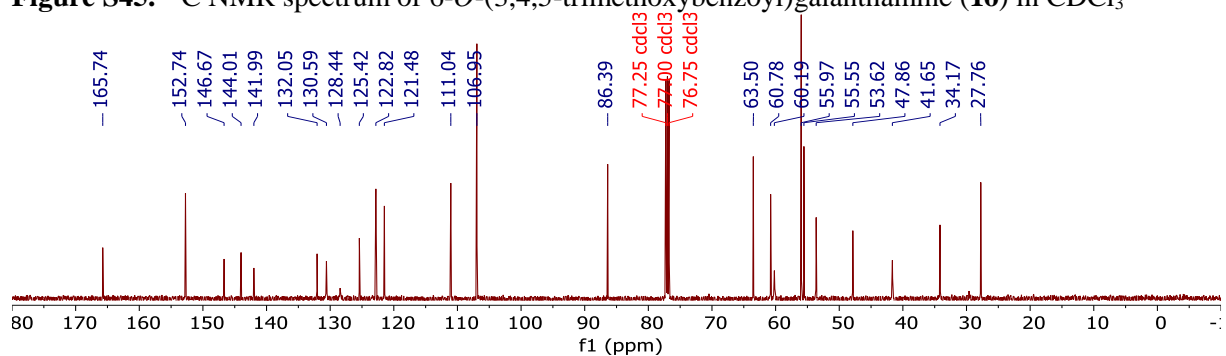

**Figure S46.** ESI-HRMS spectrum of 6-*O*-(3,5-diethoxybenzoyl)galanthamine (**1p**)

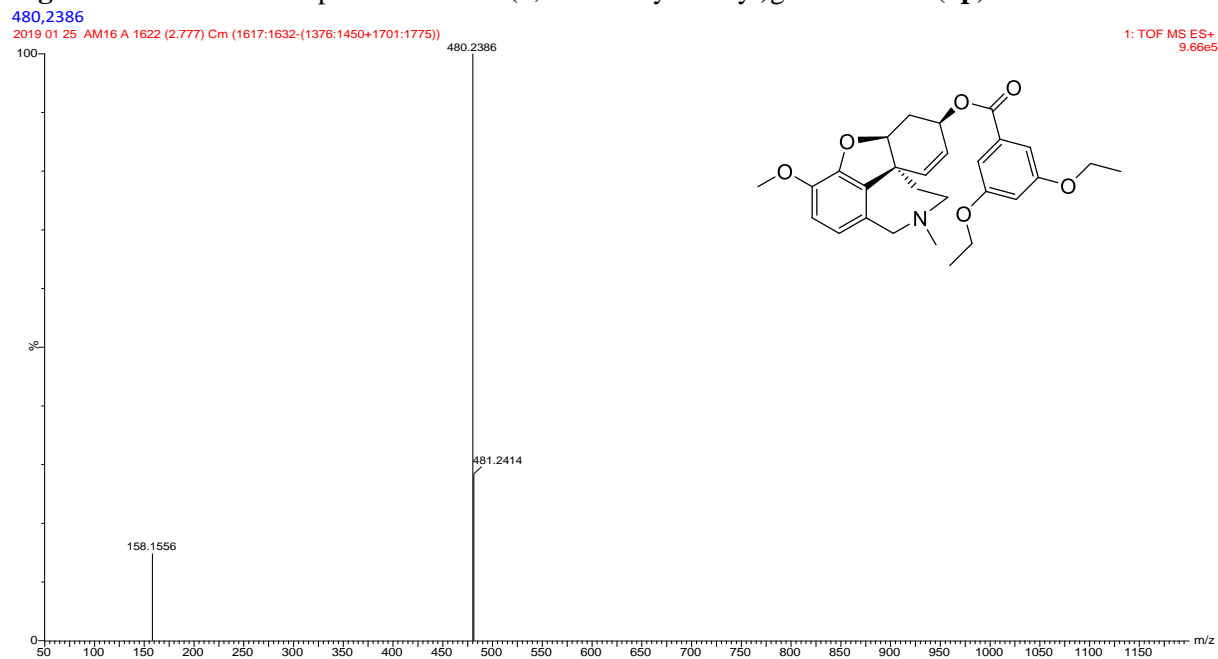

**Figure S47.**  $^1\text{H}$  NMR spectrum of 6-*O*-(3,5-diethoxybenzoyl)galanthamine (**1p**) in  $\text{CDCl}_3$

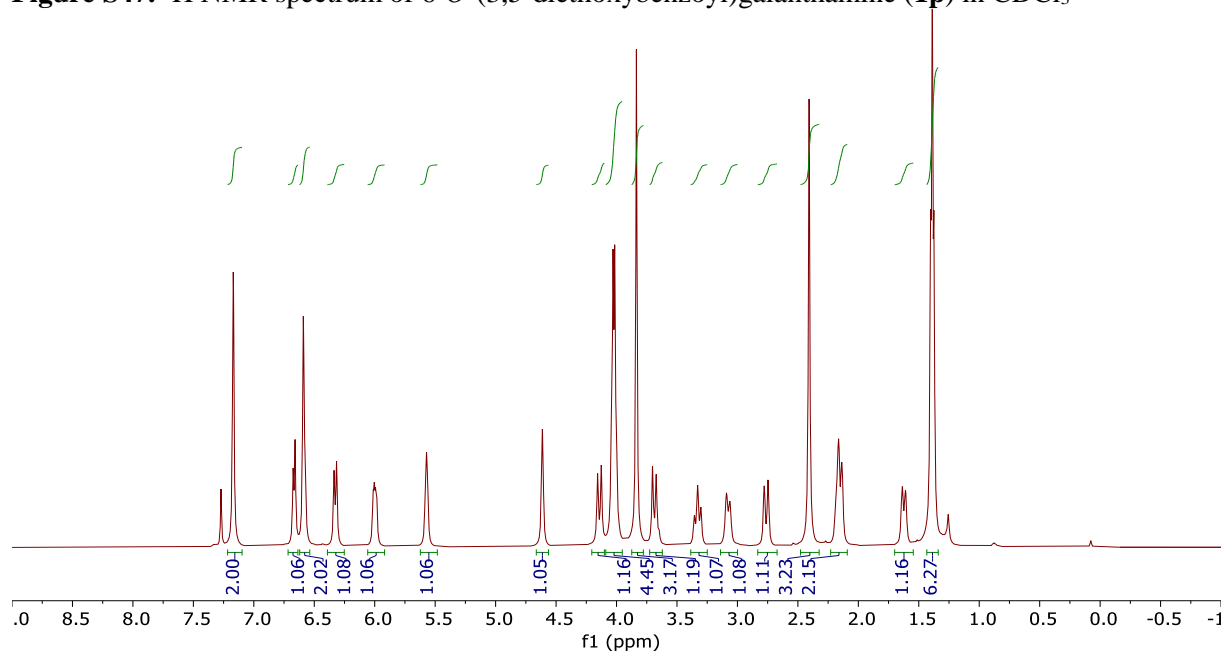

**Figure S48.**  $^{13}\text{C}$  NMR spectrum of 6-*O*-(3,5-diethoxybenzoyl)galanthamine (**1p**) in  $\text{CDCl}_3$

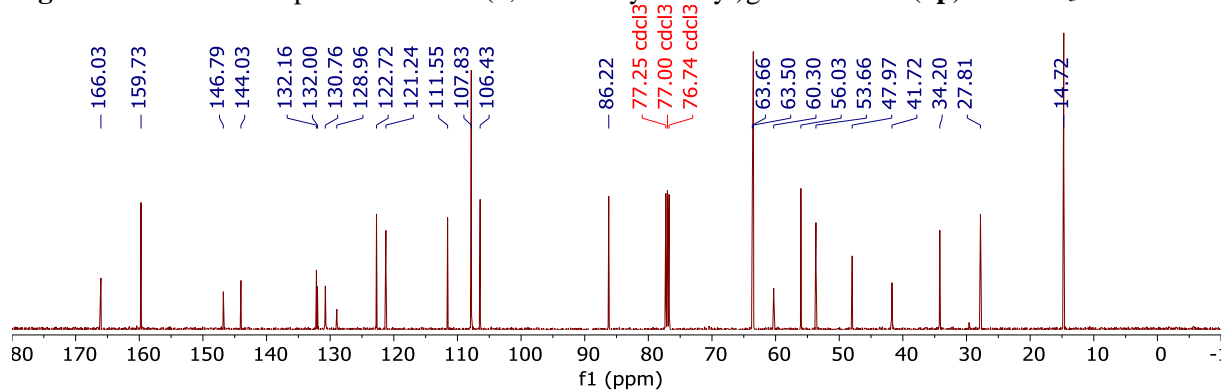

**Figure S49.** ESI-HRMS spectrum of 6-*O*-(1-naphtoyl)galanthamine (**1q**)

478.1780

2021 01 12 AM 21A 1551 (2.672) Cm (1540:1590-(1377:1464+1658:1786))

1: TOF MS ES+  
3.33e6

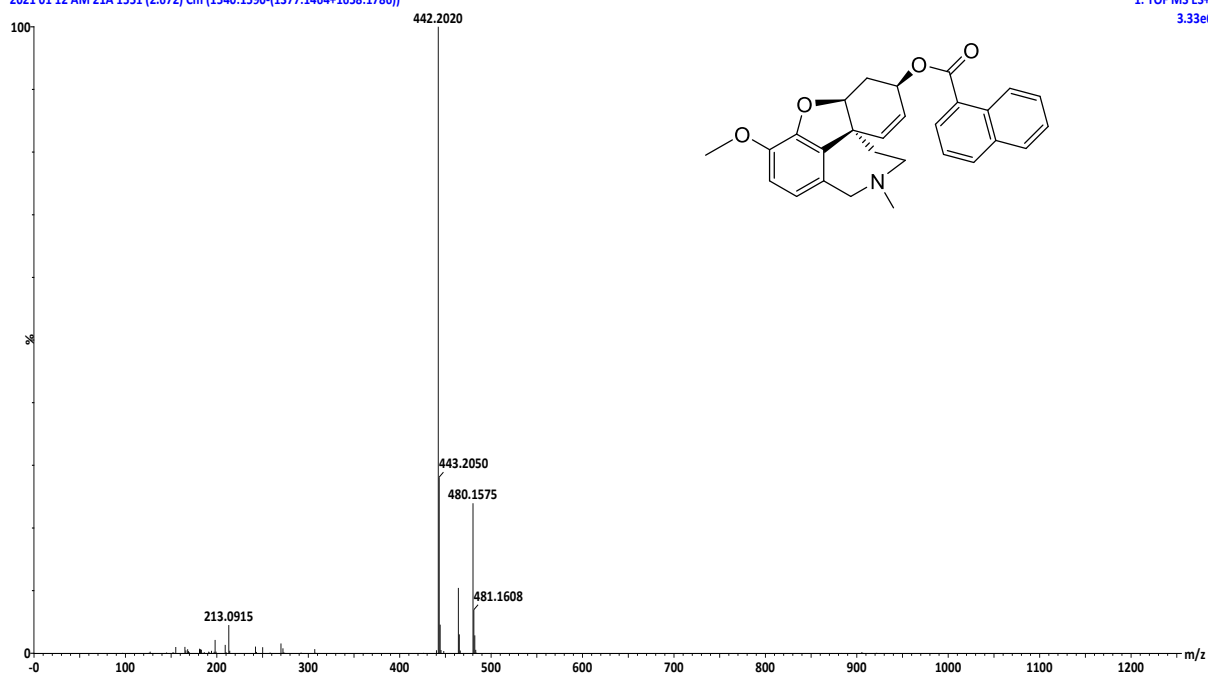

**Figure S50.** <sup>1</sup>H NMR spectrum of 6-*O*-(1-naphtoyl)galanthamine (**1q**) in CDCl<sub>3</sub>

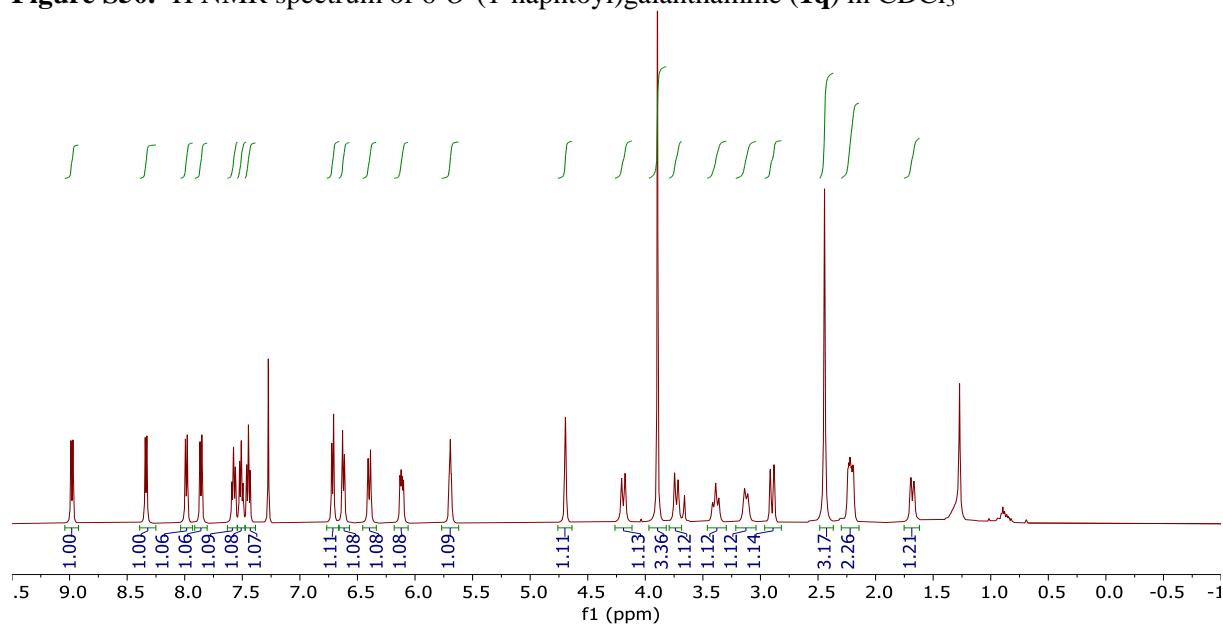

**Figure S51.** <sup>13</sup>C NMR spectrum of 6-*O*-(1-naphtoyl)galanthamine (**1q**) in CDCl<sub>3</sub>

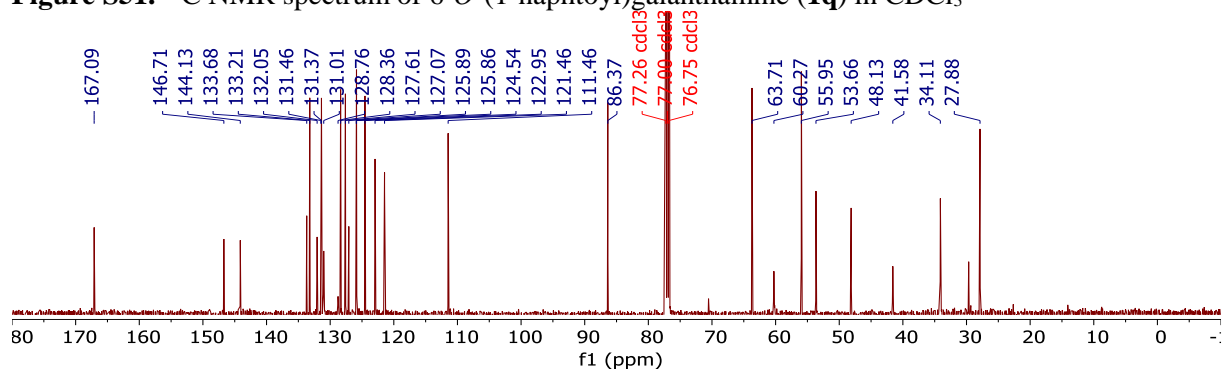

**Figure S52.** ESI-HRMS spectrum of 6-*O*-(2-naphtoyl)galanthamine (**1r**)

478.1780

2021 01 12 AM 20A 1559 (2.686) Cm (1546:1586-(1378:1464+1667:1753))

1: TOF MS ES+  
3.24e6

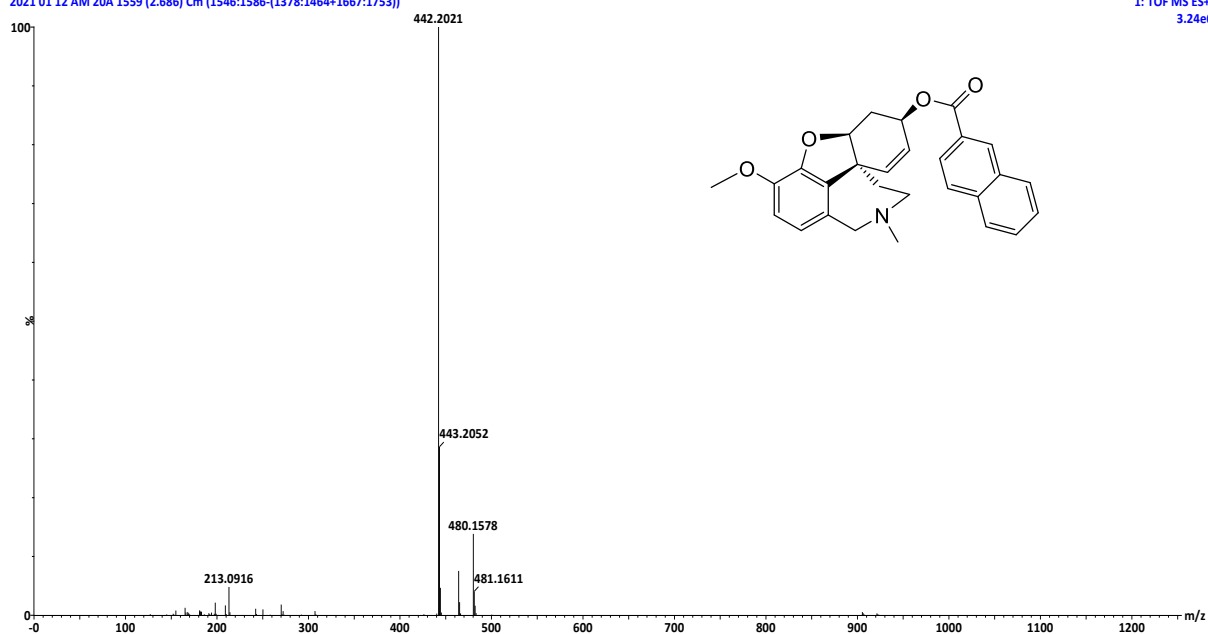

**Figure S53.**  $^1\text{H}$  NMR spectrum of 6-*O*-(2-naphtoyl)galanthamine (**1r**) in  $\text{CDCl}_3$

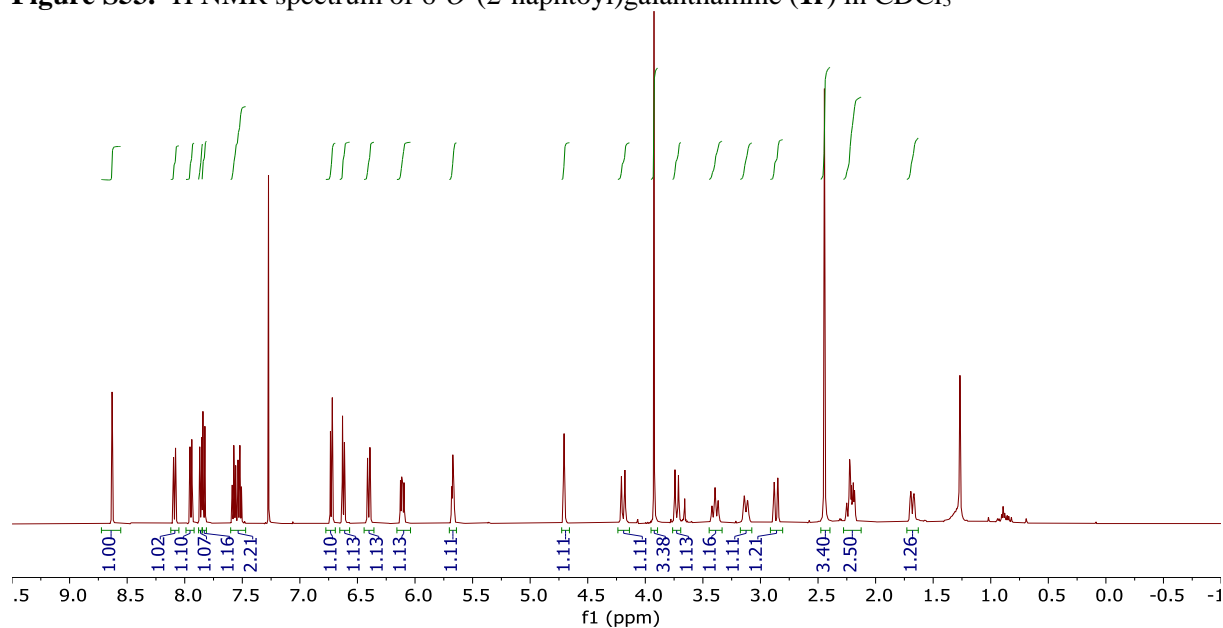

**Figure S54.**  $^{13}\text{C}$  NMR spectrum of 6-*O*-(2-naphtoyl)galanthamine (**1r**) in  $\text{CDCl}_3$

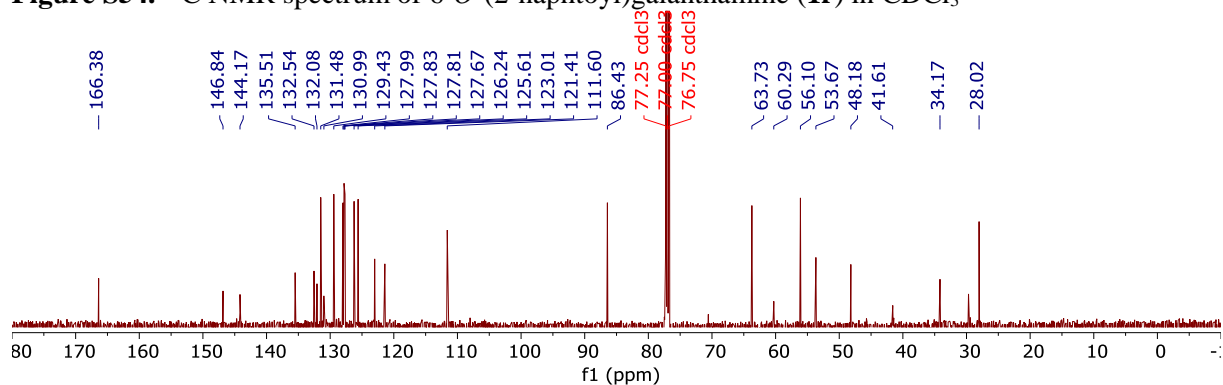

**Figure S55.** ESI-HRMS spectrum of 6-*O*-(2-furoyl)galanthamine (**1s**)

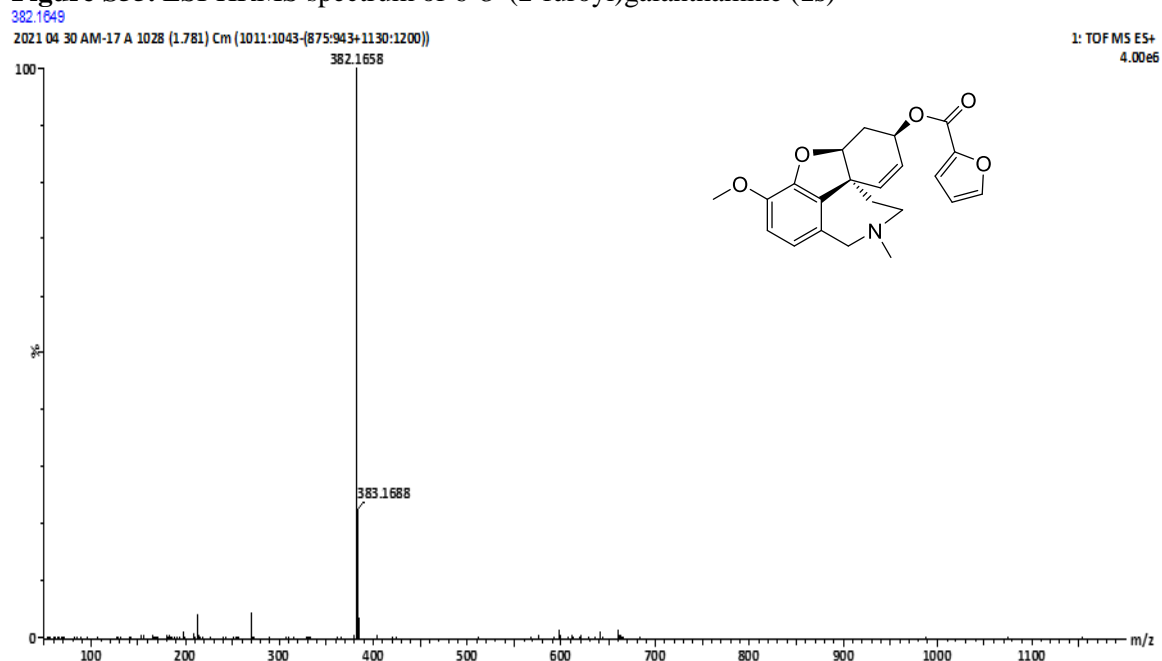

**Figure S56.**  $^1\text{H}$  NMR spectrum of 6-*O*-(2-furoyl)galanthamine (**1s**) in  $\text{CDCl}_3$

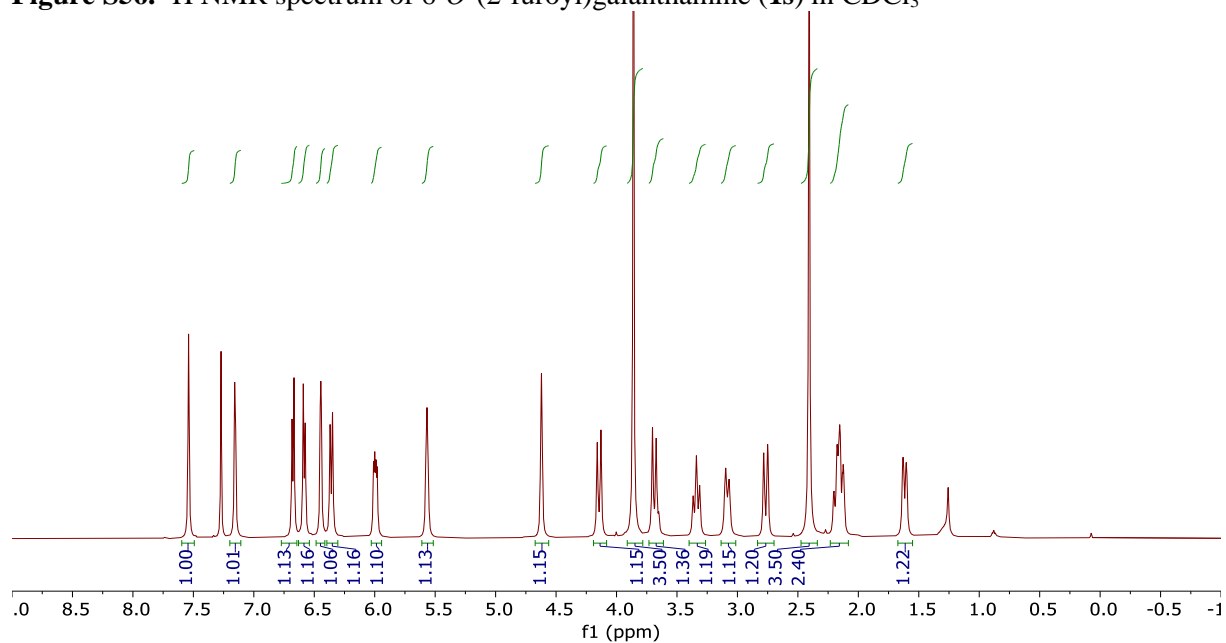

**Figure S57.**  $^{13}\text{C}$  NMR spectrum of 6-*O*-(2-furoyl)galanthamine (**1s**) in  $\text{CDCl}_3$

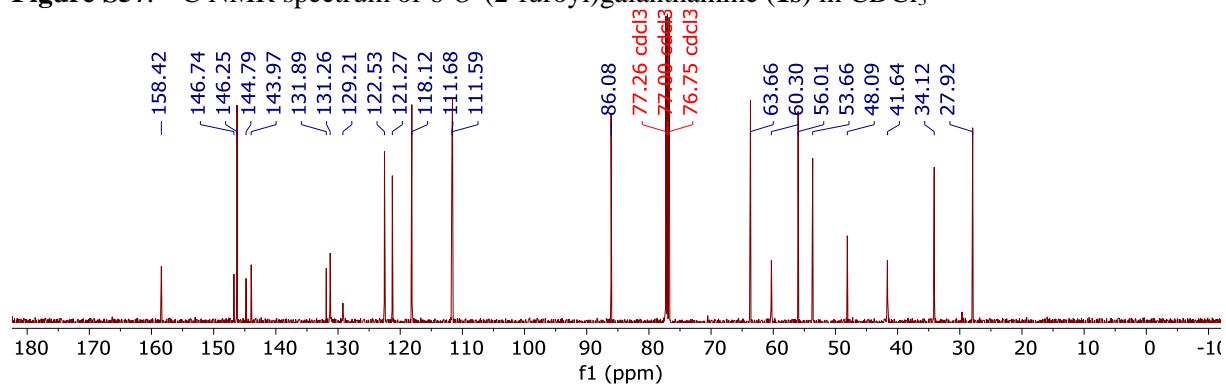

**Figure S58.** ESI-HRMS spectrum of 3-*O*-methylpancracine (**3**)

302.1378

2020 05 29 NM4 B 674 (1.194) Cm (662:675-(634:644+699:712))

1: TOF MS ES+

1.75e6

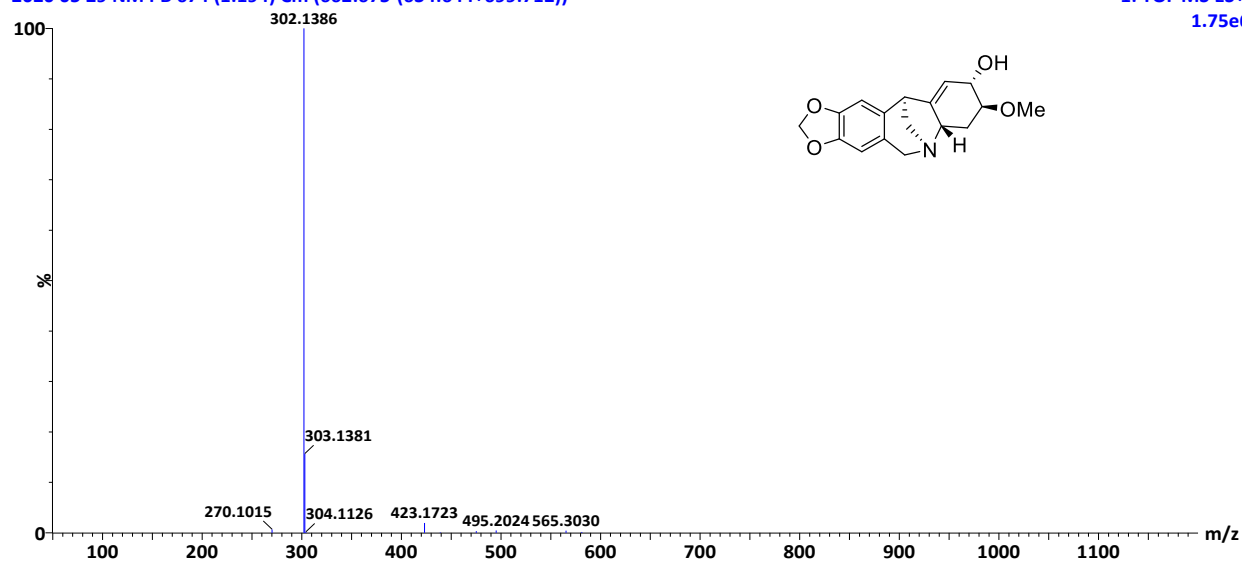

**Figure S59.**  $^1\text{H}$  NMR spectrum of 3-*O*-methylpancracine (**3**) in  $\text{CDCl}_3$

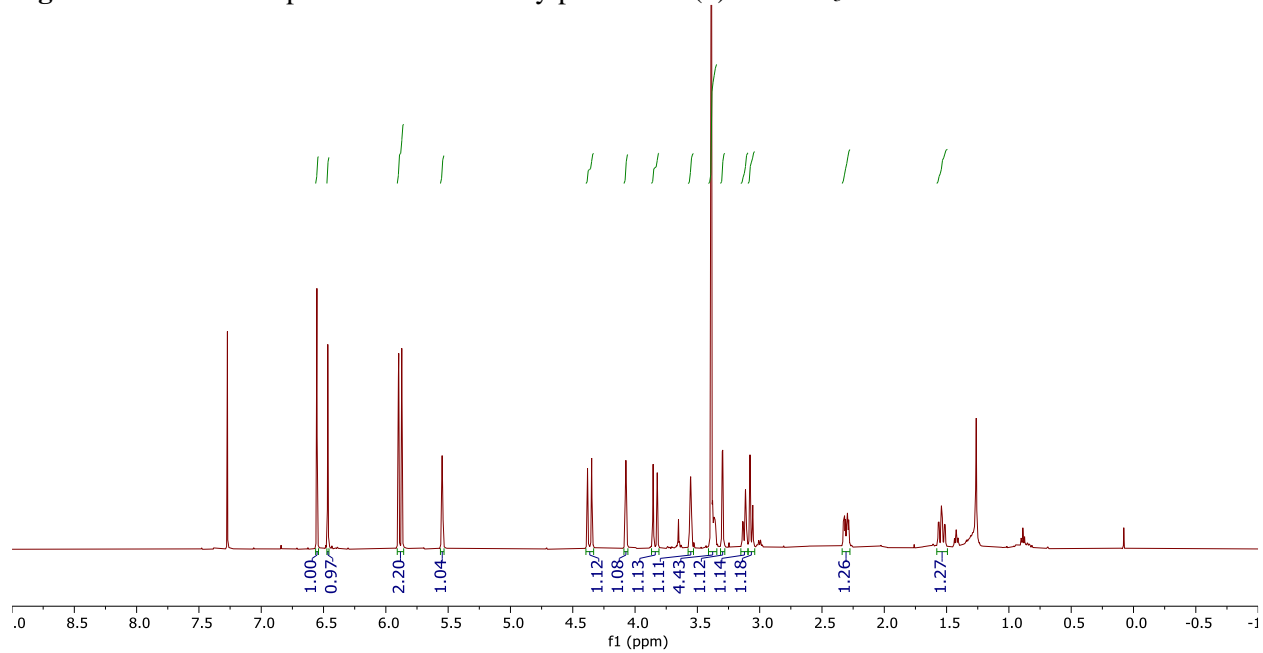



**Figure S60.**  $^{13}\text{C}$  NMR spectrum of 3-*O*-methylpancracine (**3**) in  $\text{CDCl}_3$

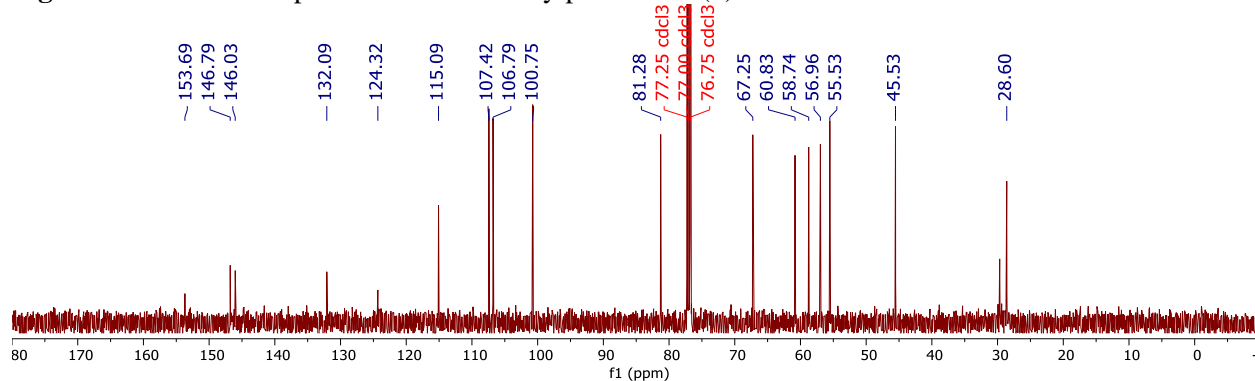

**Figure S61.** ESI-HRMS spectrum of 2-*O*-(3,5-dimethylbenzoyl)-3-*O*-methylpancracine (**3a**)

434.1962

2020 05 28 NM A59 A 1560 (2.742) Cm (1551:1573-(1425:1499+1640:1696))

1: TOF MS ES+  
2.52e6

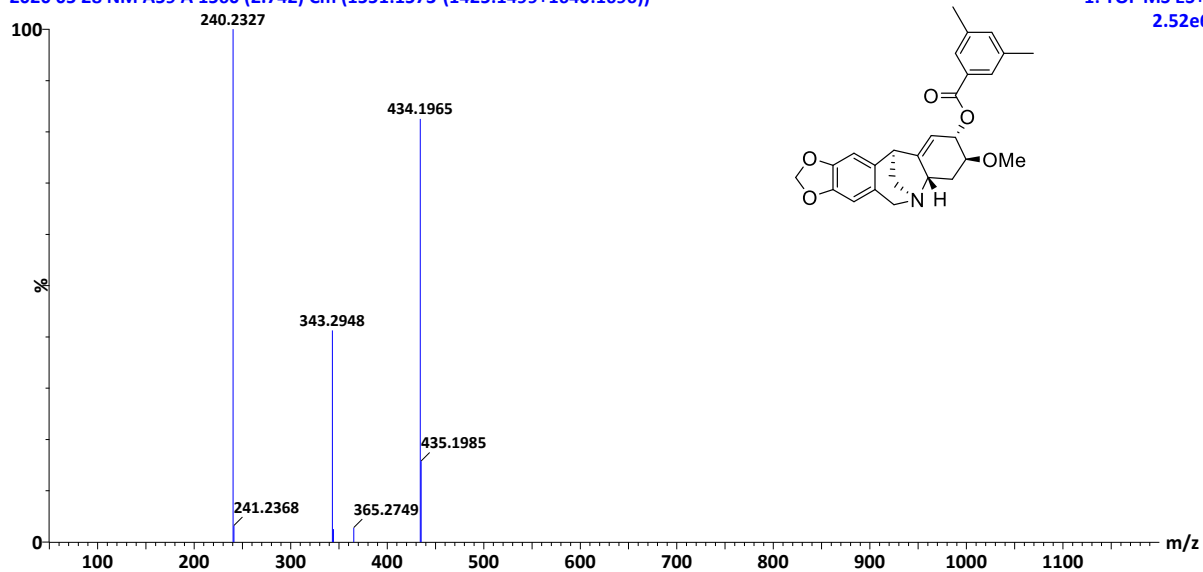

**Figure S62.**  $^1\text{H}$  NMR spectrum of 2-*O*-(3,5-dimethylbenzoyl)-3-*O*-methylpancracine (**3a**) in  $\text{CDCl}_3$

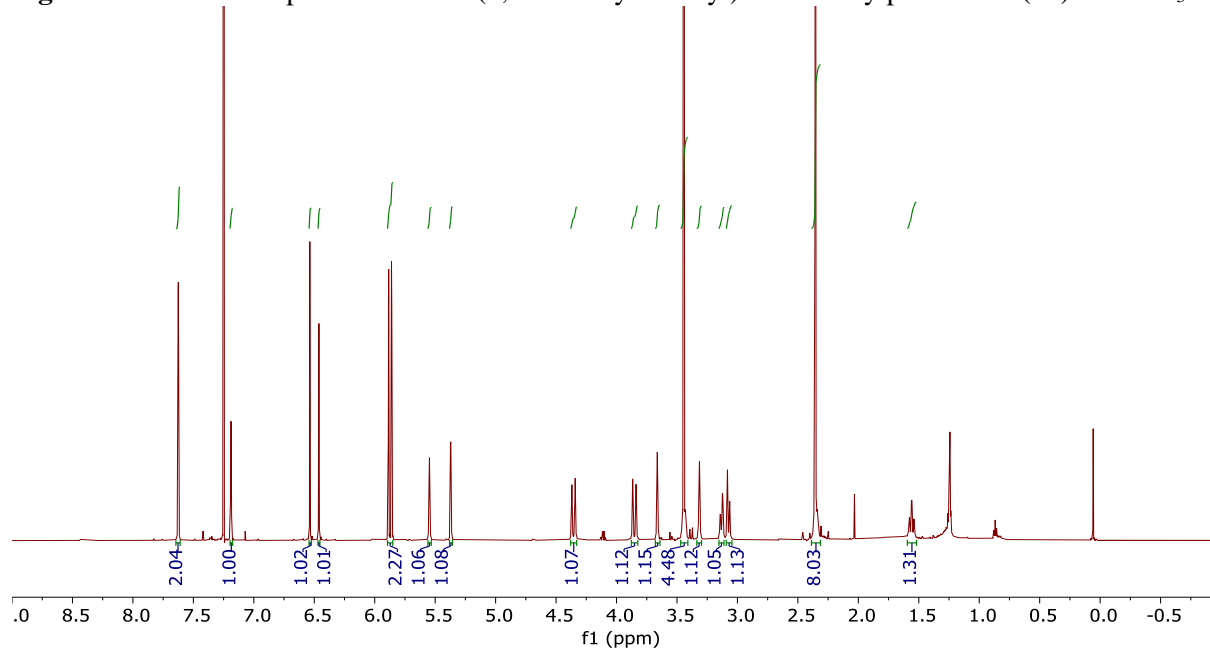

**Figure S63.**  $^{13}\text{C}$  NMR spectrum of 2-*O*-(3,5-dimethylbenzoyl)-3-*O*-methylpancracine (**3a**) in  $\text{CDCl}_3$

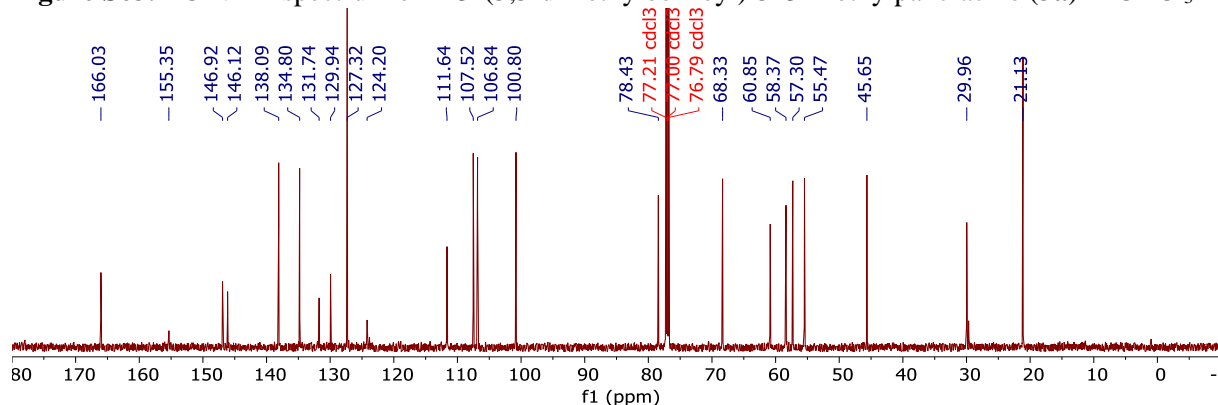

**Figure S64.** ESI-HRMS spectrum of 2-*O*-(2,4,6-trimethylbenzoyl)-3-*O*-methylpancracine (**3b**)

448.2118

2020 05 28 NM A15 A 1597 (2.807) Cm (1596:1618-(1483:1534+1668:1712))

1: TOF MS ES+  
3.69e6

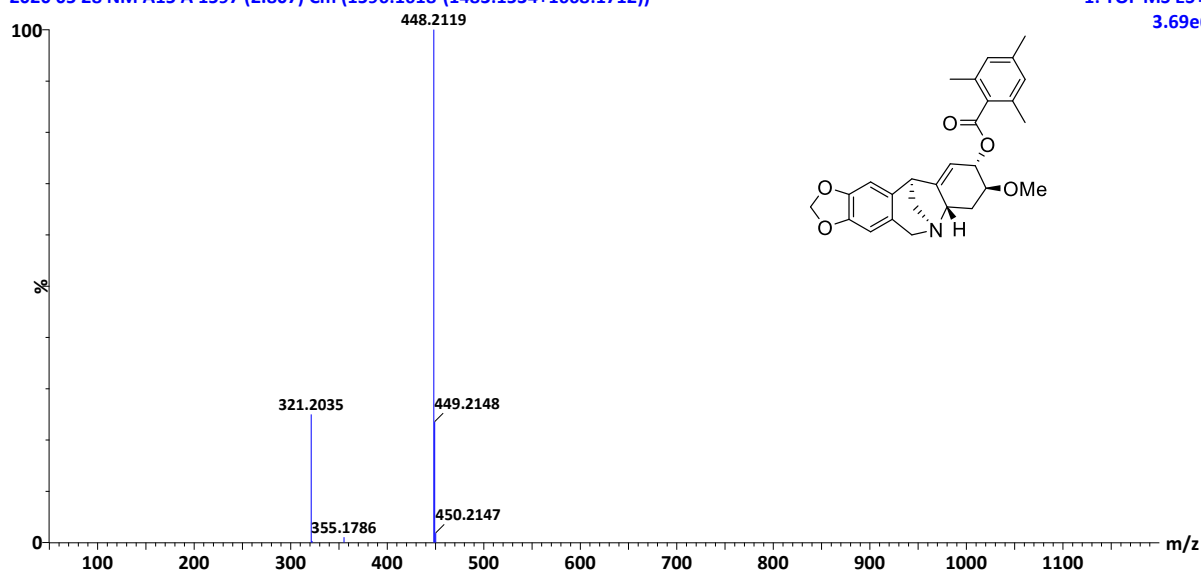

**Figure S65.**  $^1\text{H}$  NMR spectrum of 2-*O*-(2,4,6-trimethylbenzoyl)-3-*O*-methylpancracine (**3b**) in  $\text{CDCl}_3$

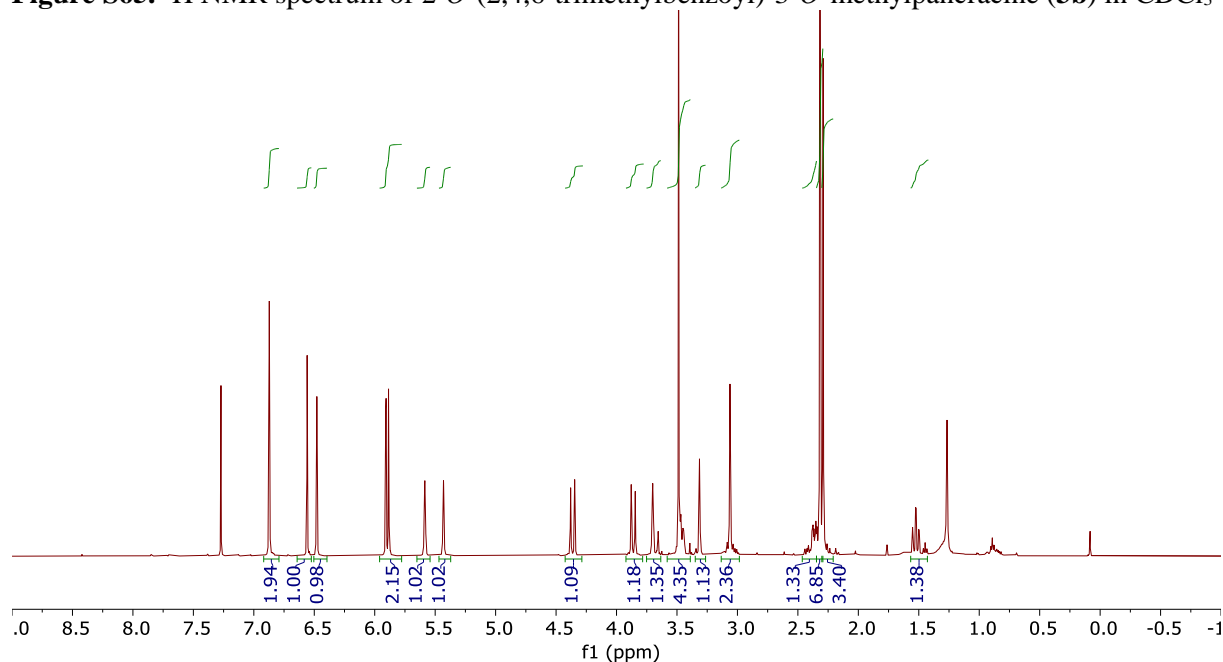

**Figure S66.**  $^{13}\text{C}$  NMR spectrum of 2-*O*-(2,4,6-trimethylbenzoyl)-3-*O*-methylpancracine (**3b**) in  $\text{CDCl}_3$

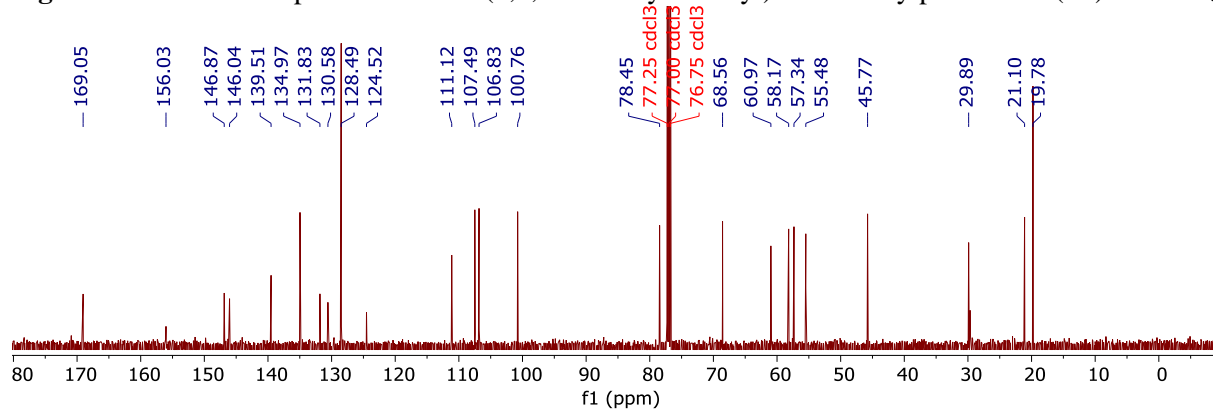

**Figure S67.** ESI-HRMS spectrum of 2-*O*-(4-*tert*-butylbenzoyl)-3-*O*-methylpancracine (**3c**)

462.2275

2020 09 23 NM47B 1715 (2.954) Cm (1706:1735-(1604:1676+1792:1885))

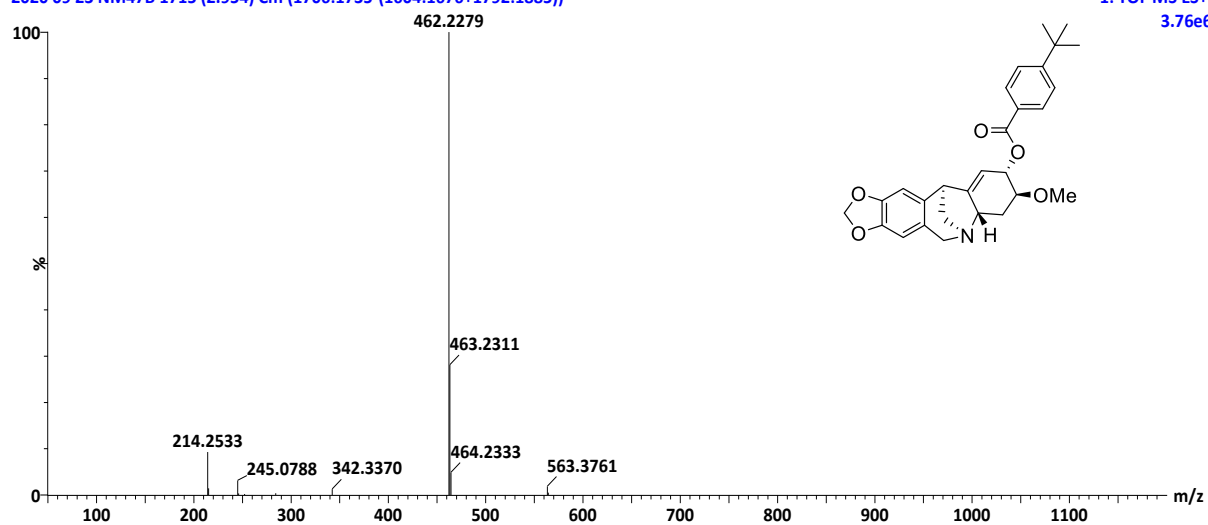

**Figure S68.**  $^1\text{H}$  NMR spectrum of 2-*O*-(4-*tert*-butylbenzoyl)-3-*O*-methylpancracine (**3c**) in  $\text{CDCl}_3$

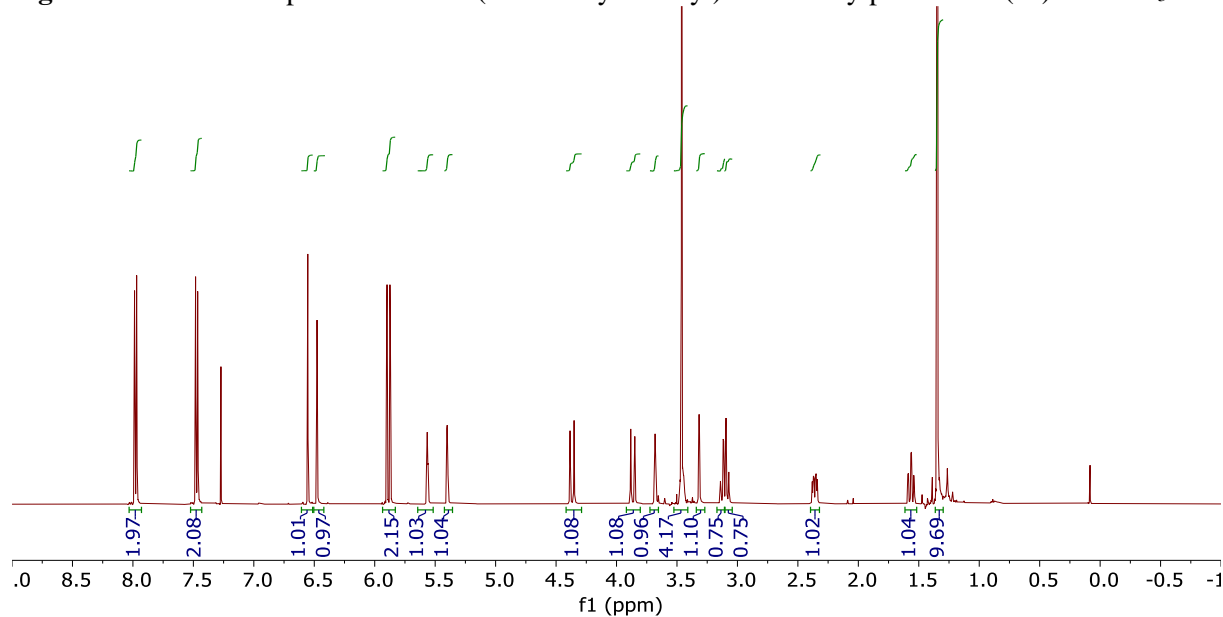

**Figure S69.**  $^{13}\text{C}$  NMR spectrum of 2-*O*-(4-*tert*-butylbenzoyl)-3-*O*-methylpancracine (**3c**) in  $\text{CDCl}_3$

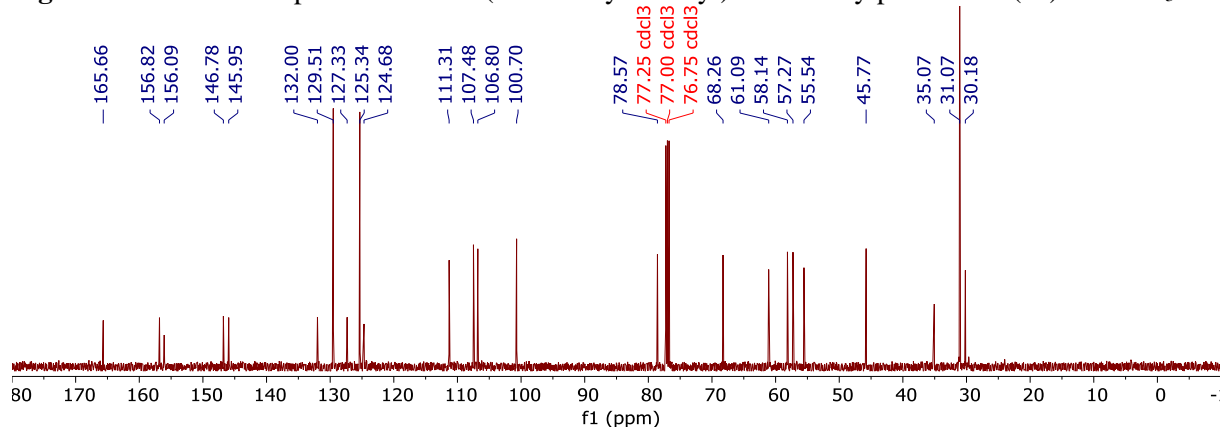

**Figure S70.** ESI-HRMS spectrum of 2-*O*-(4-butylbenzoyl)-3-*O*-methylpancracine (**3d**)

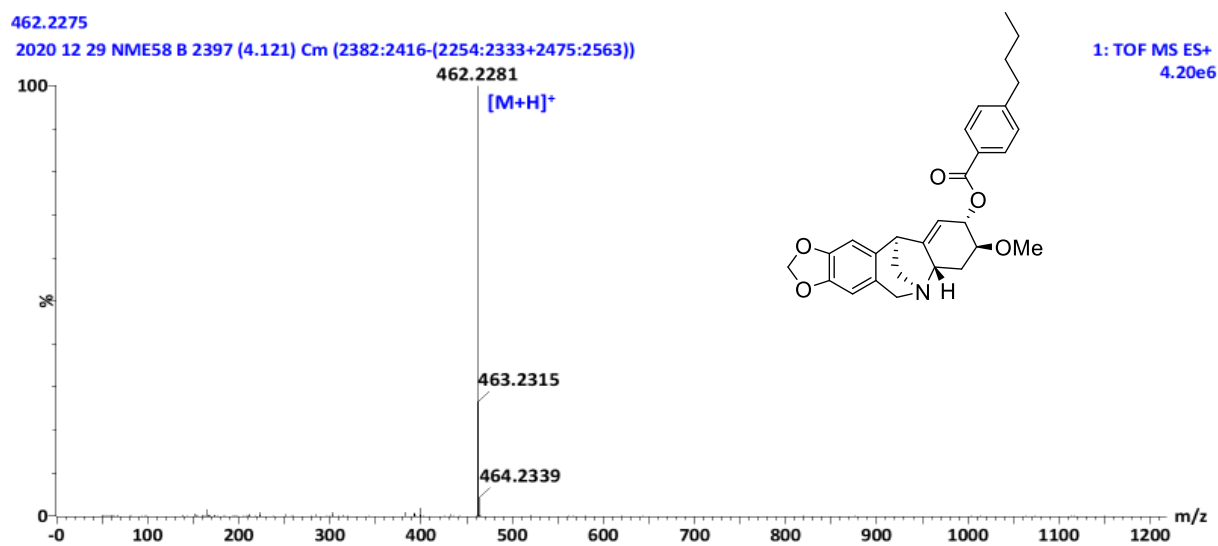

**Figure S71.**  $^1\text{H}$  NMR spectrum of 2-*O*-(4-butylbenzoyl)-3-*O*-methylpancracine (**3d**) in  $\text{CDCl}_3$

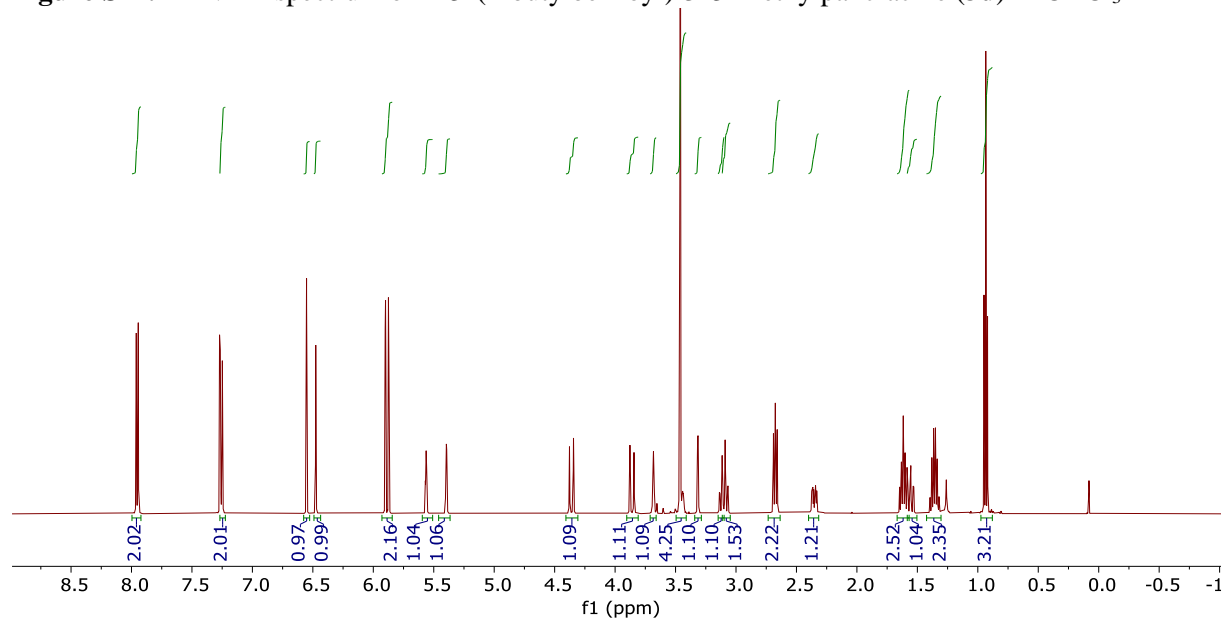

**Figure S72.**  $^{13}\text{C}$  NMR spectrum of 2-*O*-(4-butylbenzoyl)-3-*O*-methylpancracine (**3d**) in  $\text{CDCl}_3$

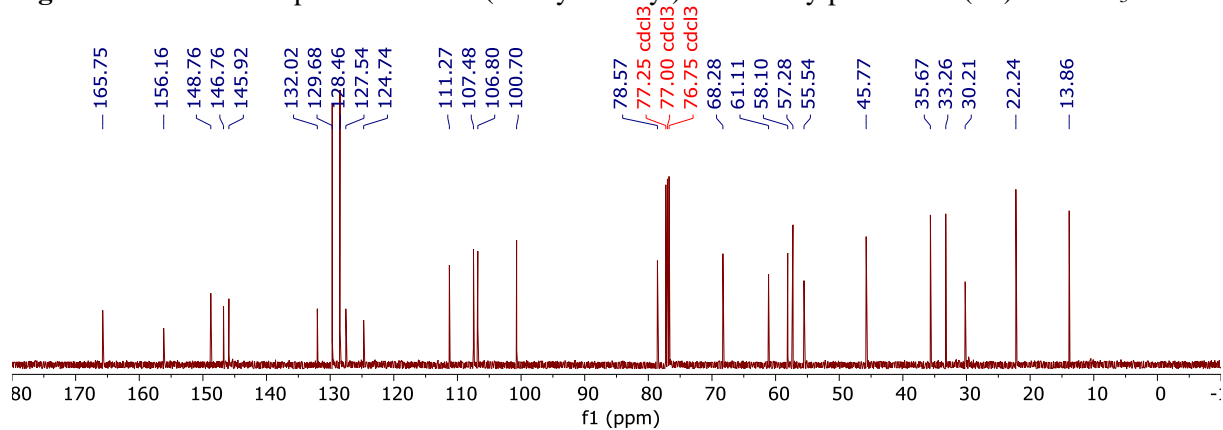

**Figure S73.** ESI-HRMS spectrum of 2-*O*-(3,5-diethoxybenzoyl)-3-*O*-methylpancracine (**3e**)

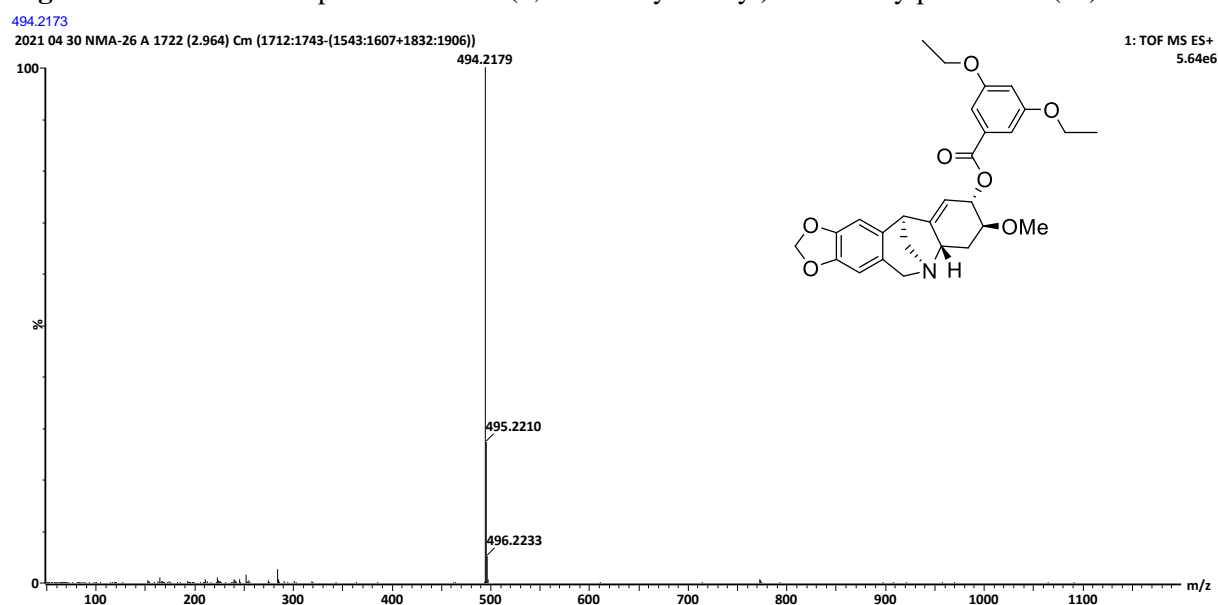

**Figure S74.**  $^1\text{H}$  NMR spectrum of 2-*O*-(3,5-diethoxybenzoyl)-3-*O*-methylpancracine (**3e**) in  $\text{CDCl}_3$

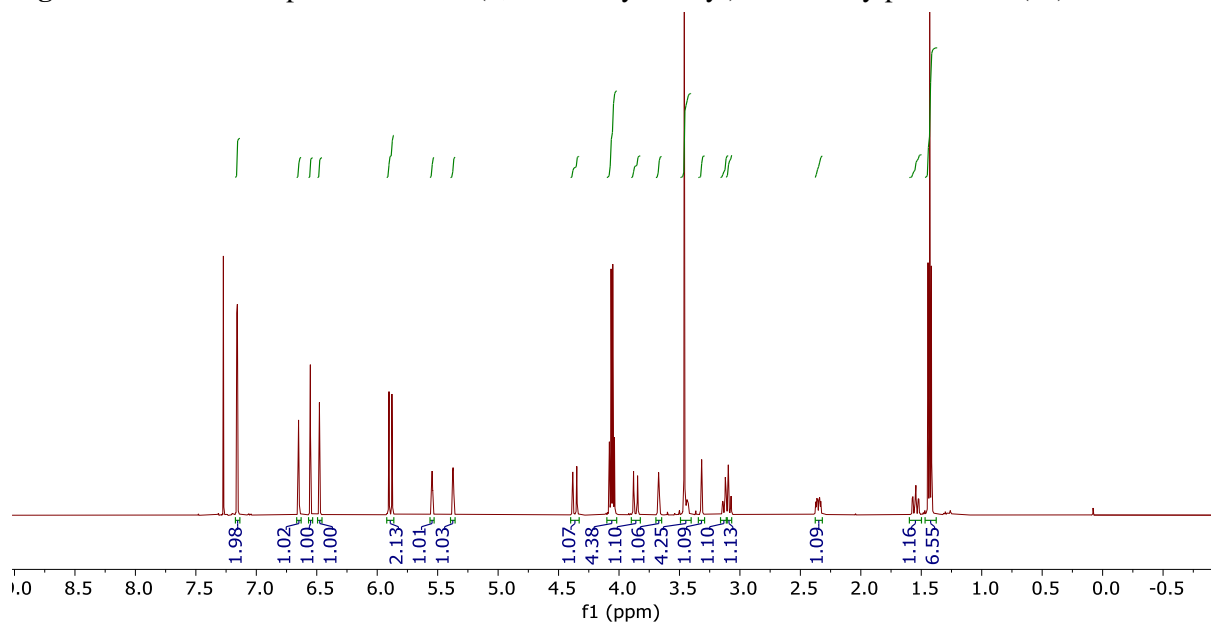

**Figure S75.**  $^{13}\text{C}$  NMR spectrum of 2-*O*-(3,5-diethoxybenzoyl)-3-*O*-methylpancracine (**3e**) in  $\text{CDCl}_3$

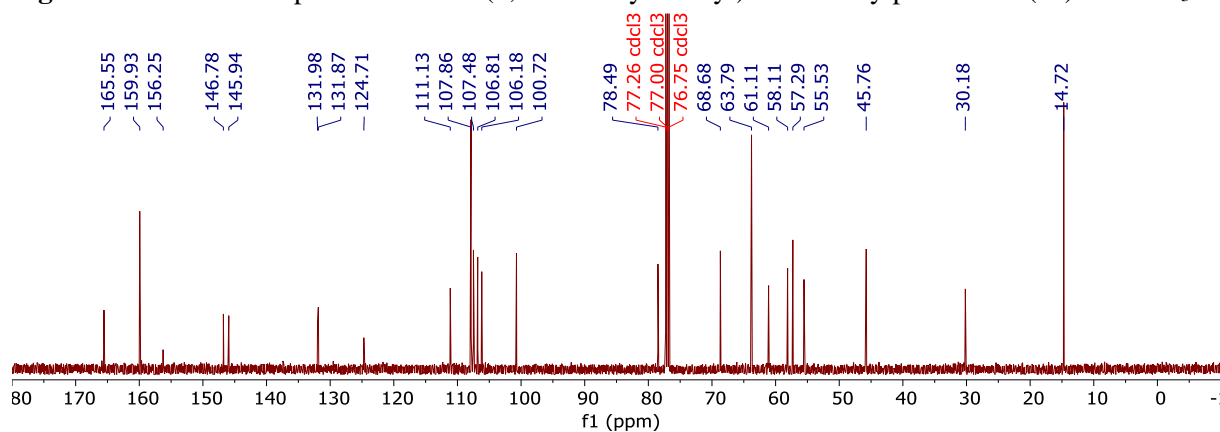

**Figure S76.** ESI-HRMS spectrum of 2-*O*-(1-naphtoyl)-3-*O*-methylpancracine (**3f**)

456.1805

2020 05 28 NM A4 A 1593 (2.801) Cm (1578:1604-(1520:1555+1645:1715))

1: TOF MS ES+  
2.21e6

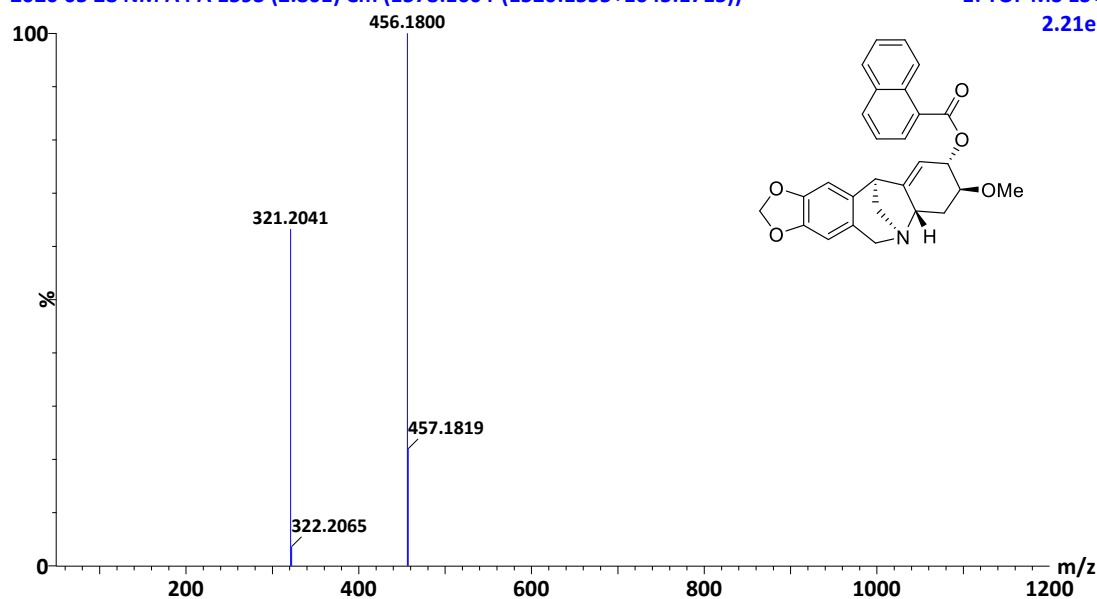

**Figure S77.**  $^1\text{H}$  NMR spectrum of 2-*O*-(1-naphtoyl)-3-*O*-methylpancracine (**3f**) in  $\text{CDCl}_3$

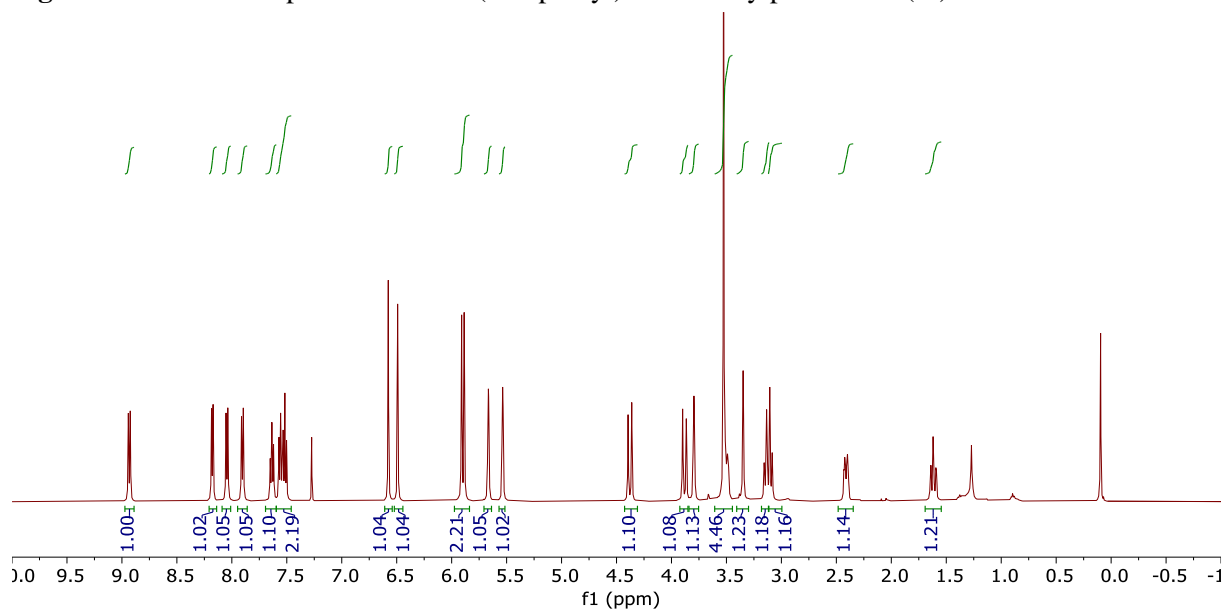

**Figure S78.**  $^{13}\text{C}$  NMR spectrum of 2-*O*-(1-naphtoyl)-3-*O*-methylpancracine (**3f**) in  $\text{CDCl}_3$

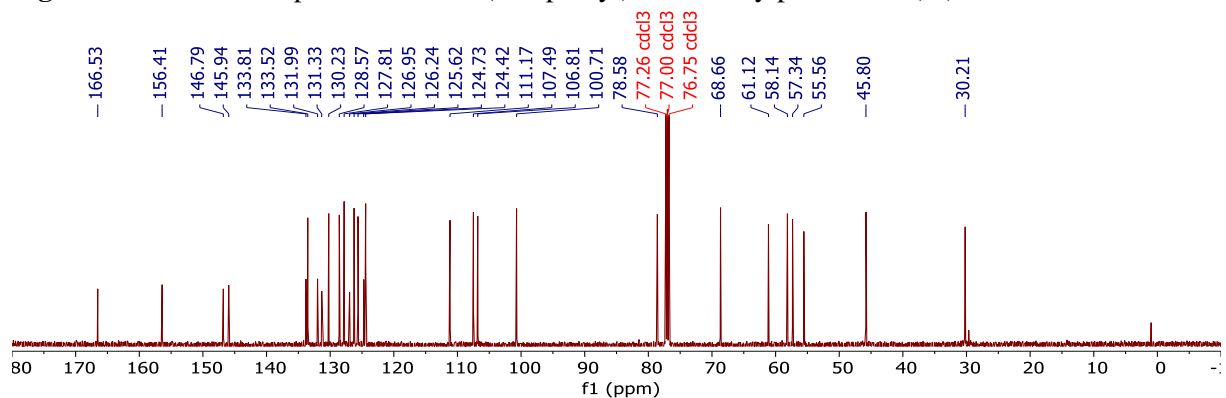

**Figure S79.** ESI-HRMS spectrum of 2-*O*-(2-naphtoyl)-3-*O*-methylpancracine (**3g**)

456.1805

2020 05 28 NM A16 A 1594 (2.802) Cm (1575:1599-(1447:1552+1662:1749))

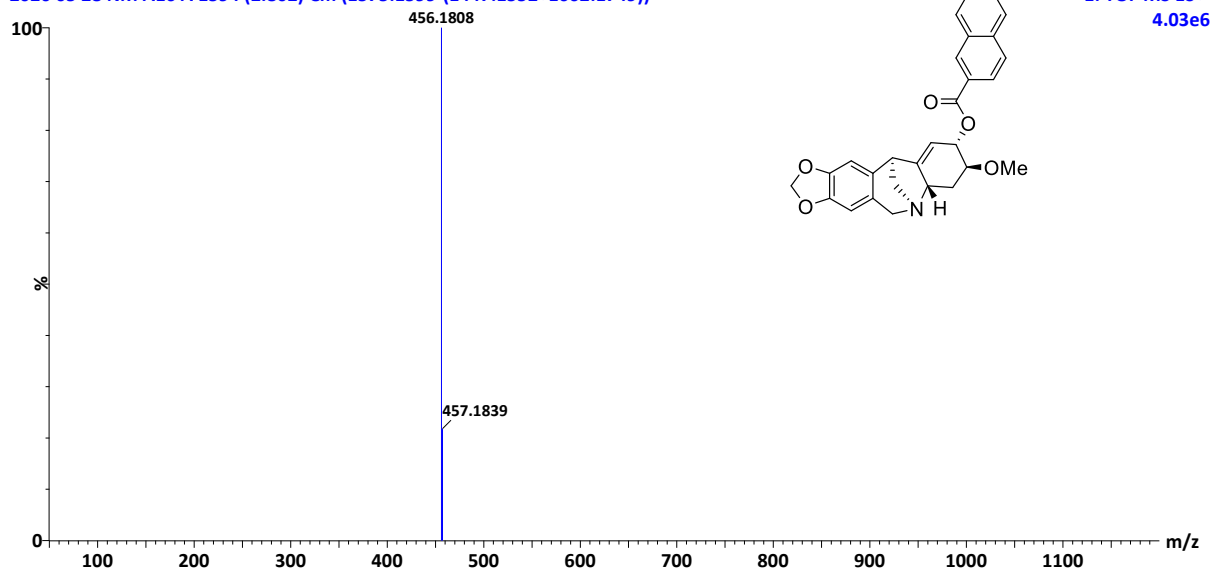

**Figure S80.**  $^1\text{H}$  NMR spectrum of 2-*O*-(2-naphtoyl)-3-*O*-methylpancracine (**3g**) in  $\text{CDCl}_3$

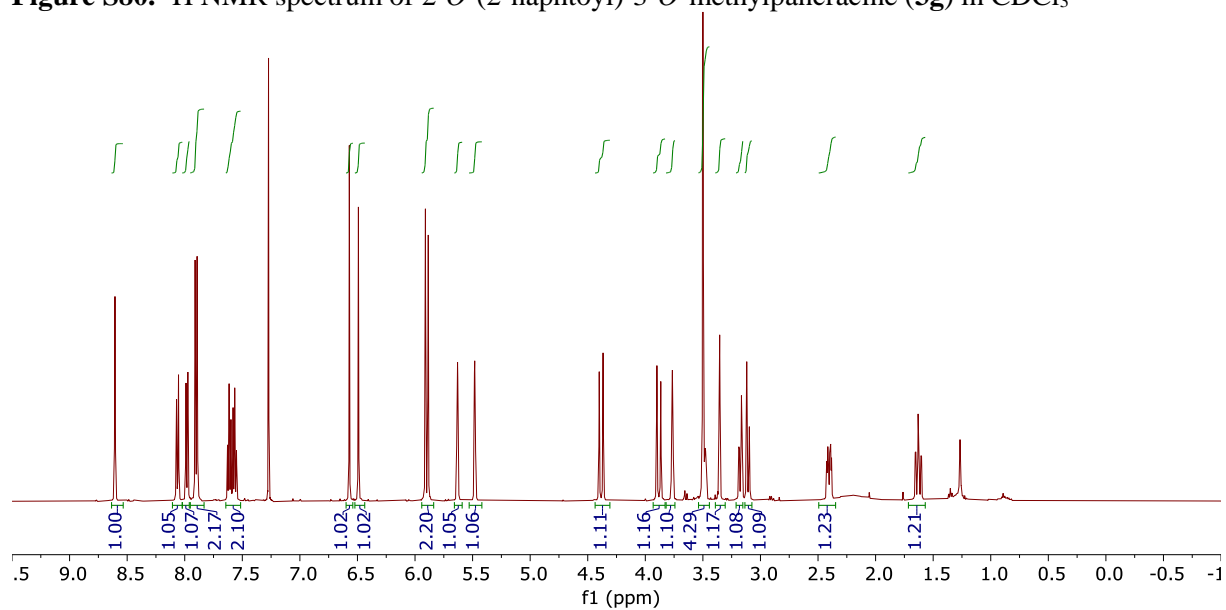

**Figure S81.**  $^{13}\text{C}$  NMR spectrum of 2-*O*-(2-naphtoyl)-3-*O*-methylpancracine (**3g**) in  $\text{CDCl}_3$

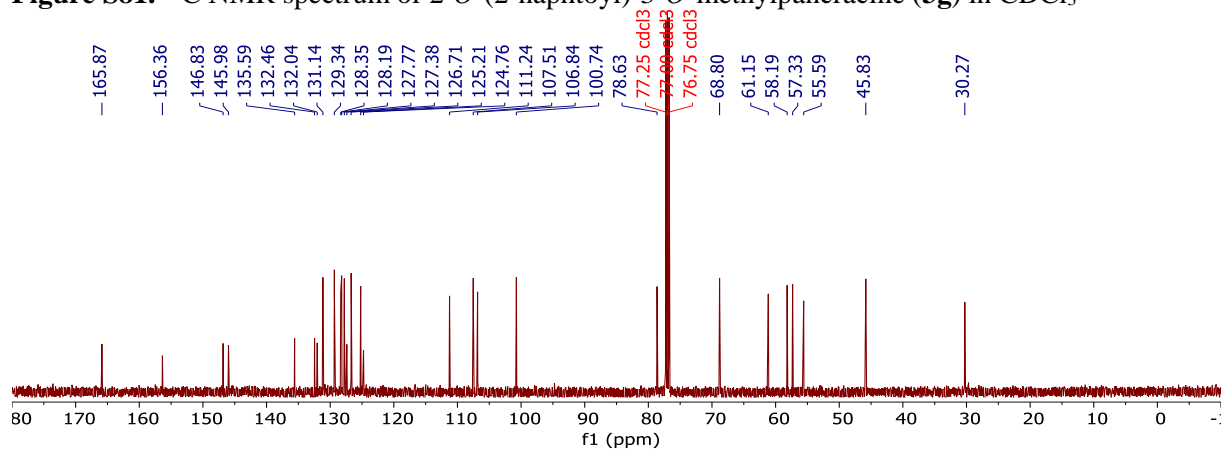



**Figure S82.** ESI-HRMS spectrum of 3-*O*-(1-naphtoyl)vittatine (**4a**)

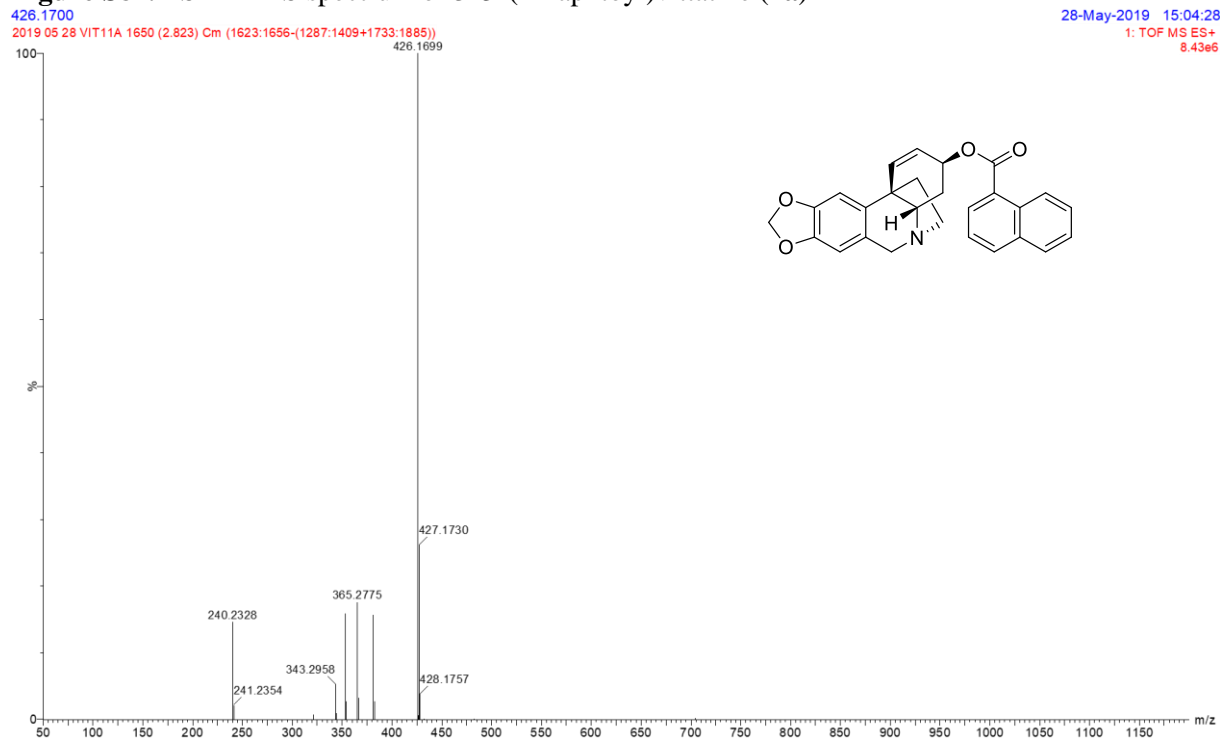

**Figure S83.**  $^1\text{H}$  NMR spectrum of 3-*O*-(1-naphtoyl)vittatine (**4a**) in  $\text{CDCl}_3$

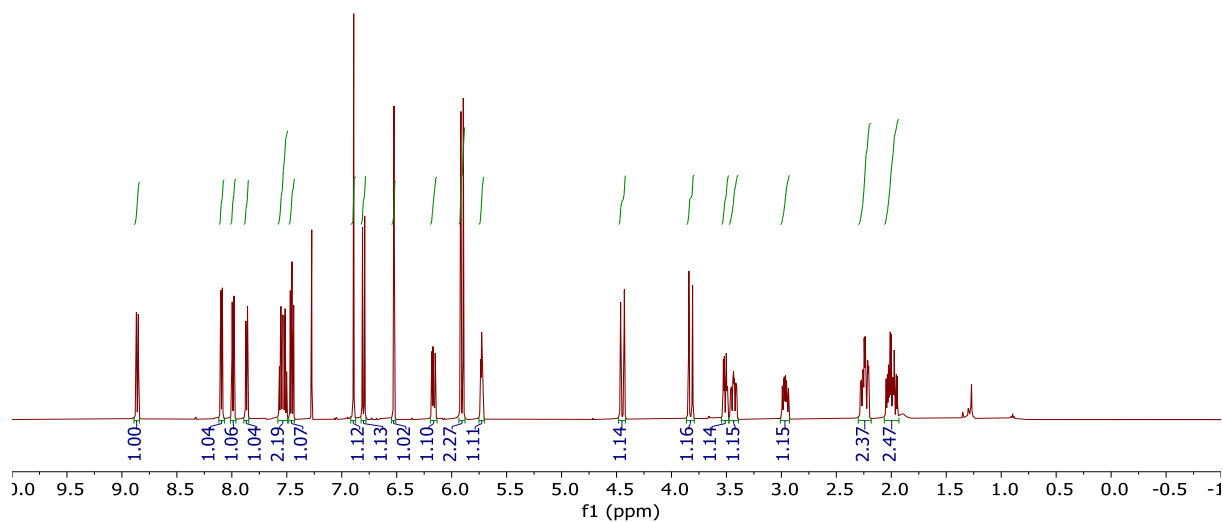

**Figure S84.**  $^{13}\text{C}$  NMR spectrum of 3-*O*-(1-naphtoyl)vittatine (**4a**) in  $\text{CDCl}_3$

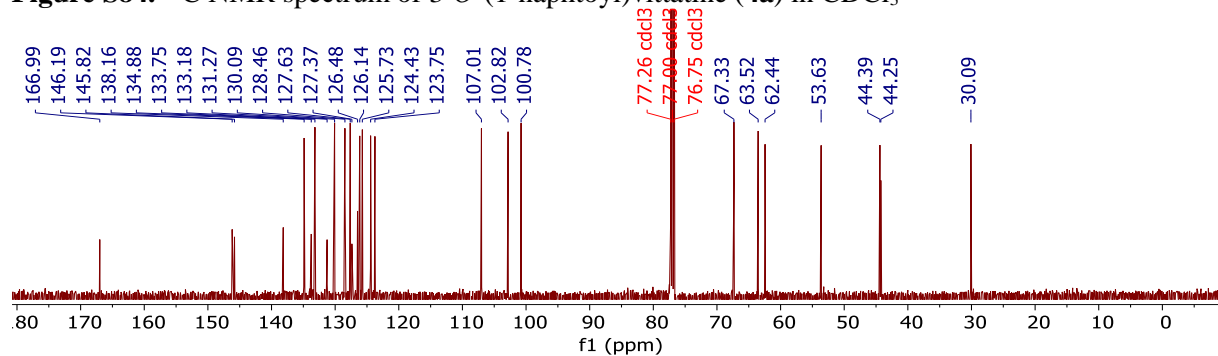

**Figure S85.** ESI-HRMS spectrum of 3-*O*-(2-naphtoyl)vittatine (**4b**)

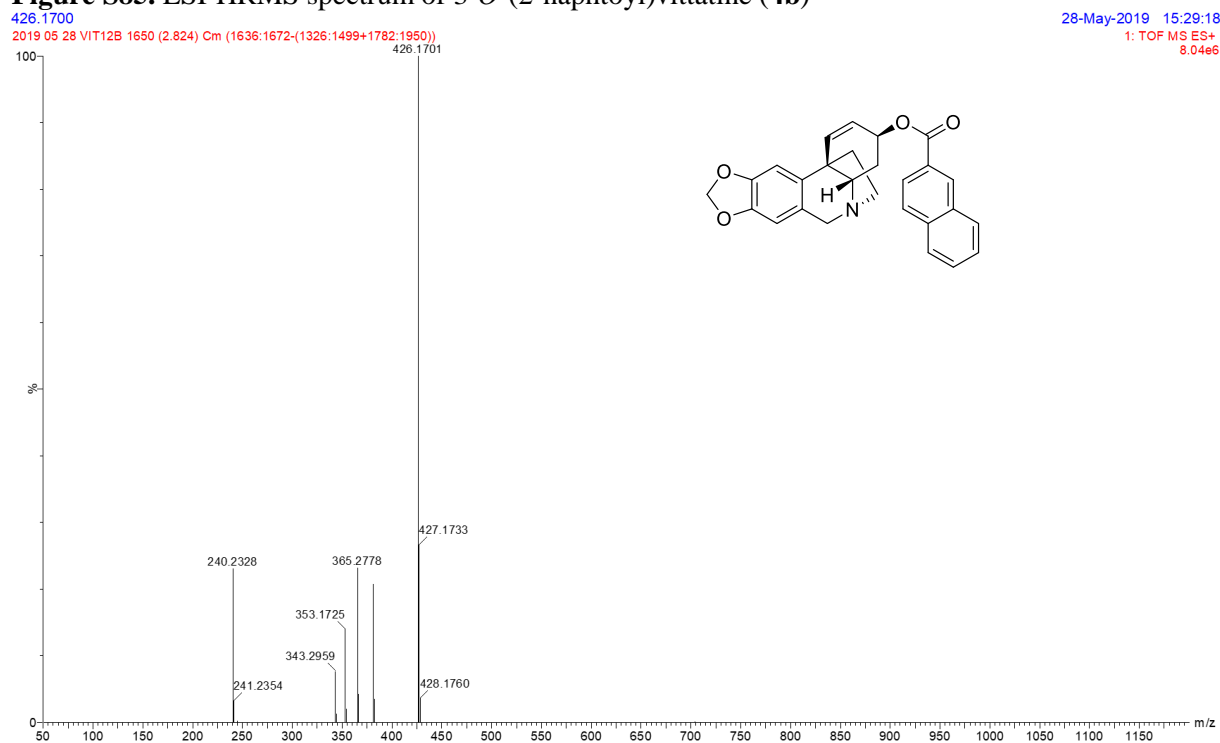

**Figure S86.**  $^1\text{H}$  NMR spectrum of 3-*O*-(2-naphtoyl)vittatine (**4b**) in  $\text{CDCl}_3$

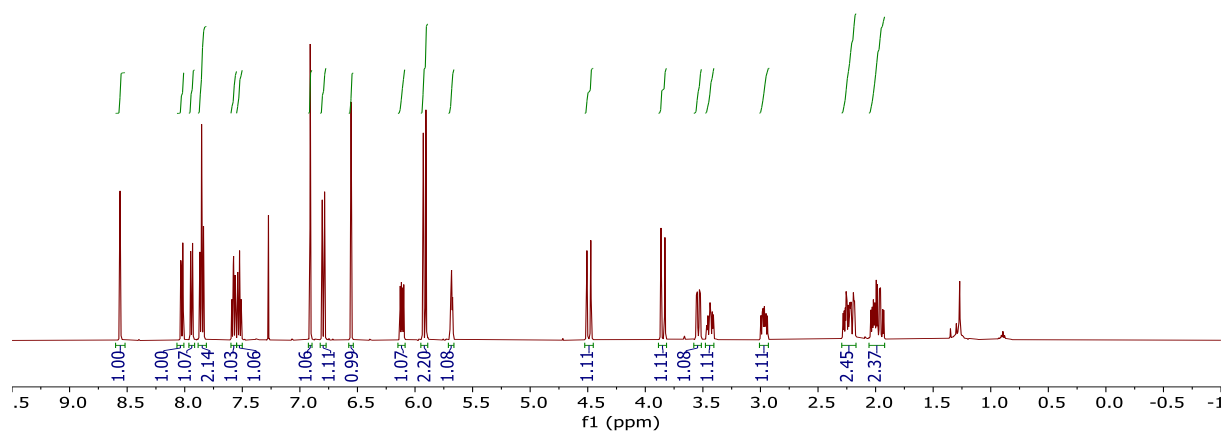

**Figure S87.**  $^{13}\text{C}$  NMR spectrum of 3-*O*-(2-naphtoyl)vittatine (**4b**) in  $\text{CDCl}_3$

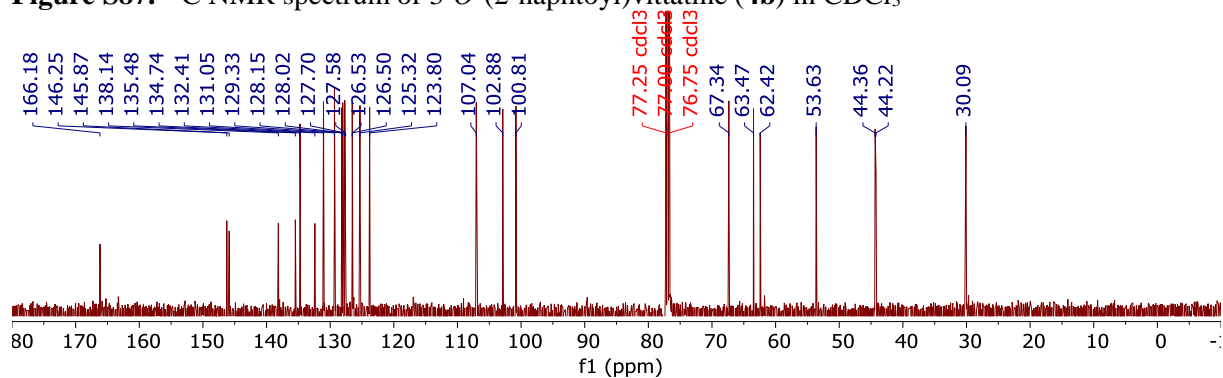

**Figure S88.** ESI-HRMS spectrum of 3-*O*-(3,5-dimethylbenzoyl)maritidine (**5a**)

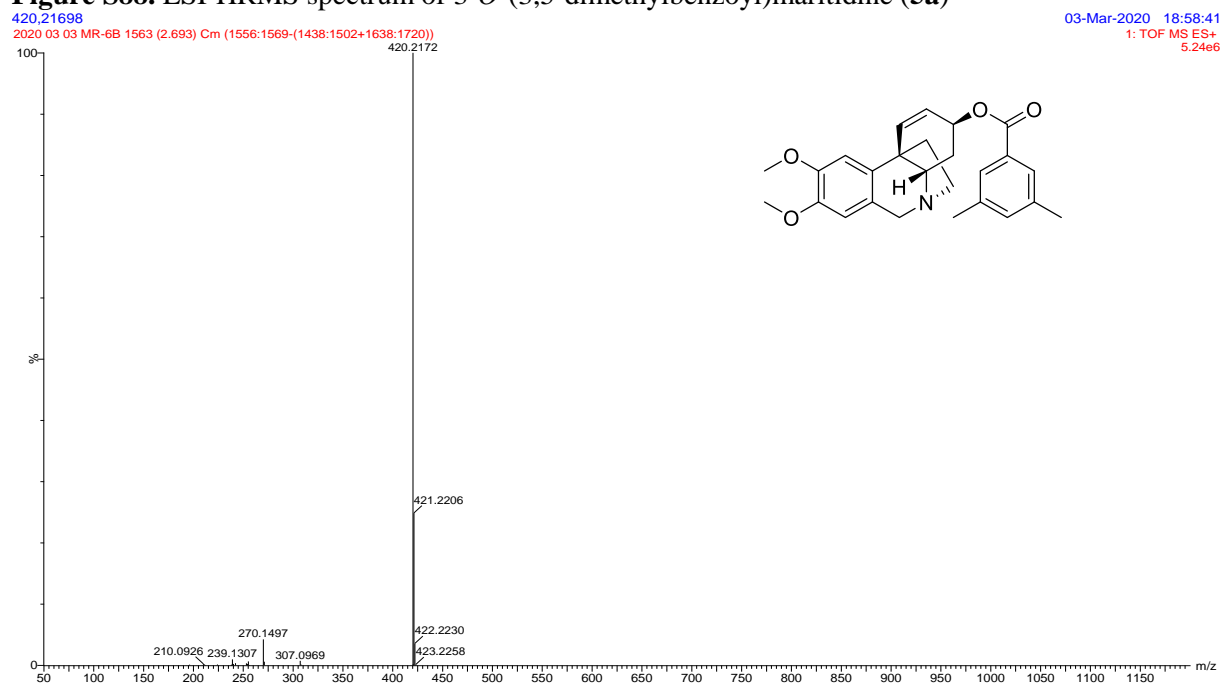

**Figure S89.**  $^1\text{H}$  NMR spectrum of 3-*O*-(3,5-dimethylbenzoyl)maritidine (**5a**) in  $\text{CDCl}_3$

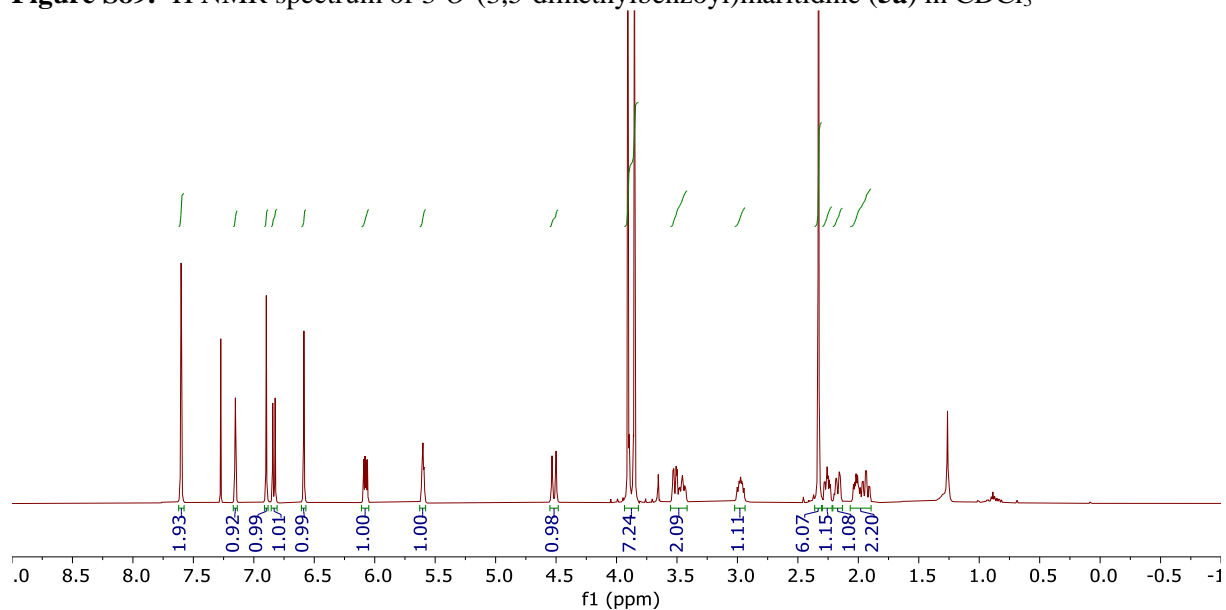

**Figure S90.**  $^{13}\text{C}$  NMR spectrum of 3-*O*-(3,5-dimethylbenzoyl)maritidine (**5a**) in  $\text{CDCl}_3$

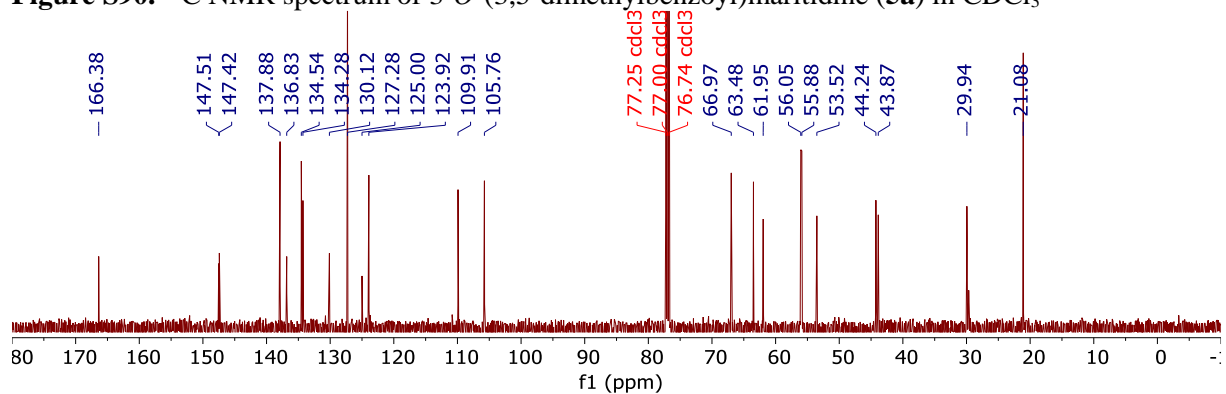

**Figure S91.** ESI-HRMS spectrum of 3-*O*-(1-naphtoyl)maritidine (**5b**)

442.20128

2021 05 01 MR-31 B 1525 (2.629) Cm (1509:1549-(1357:1438+1636:1717))

1: TOF MS ES+  
3.11e6

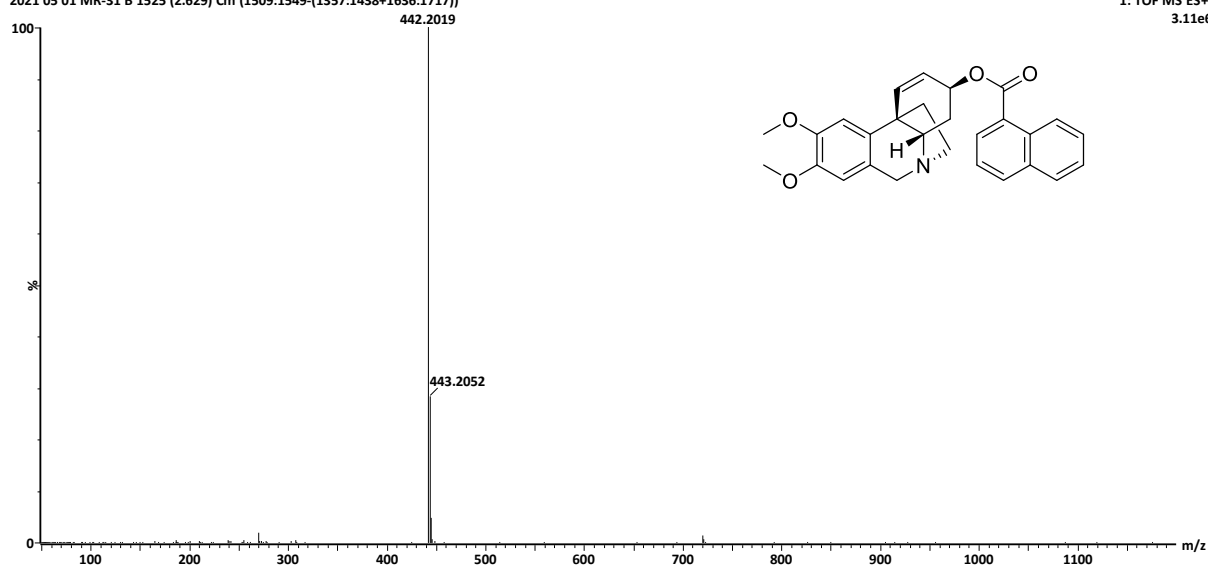

**Figure S92.**  $^1\text{H}$  NMR spectrum of 3-*O*-(1-naphtoyl)maritidine (**5b**) in  $\text{CDCl}_3$

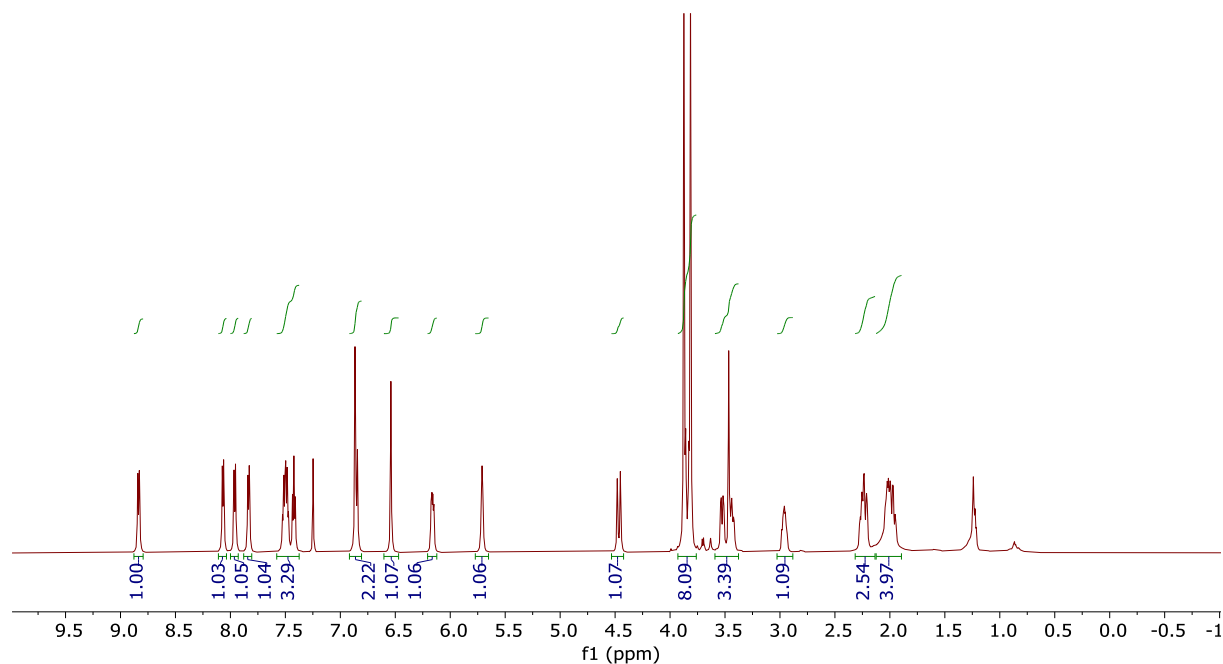

**Figure S93.**  $^{13}\text{C}$  NMR spectrum of 3-*O*-(1-naphtoyl)maritidine (**5b**) in  $\text{CDCl}_3$

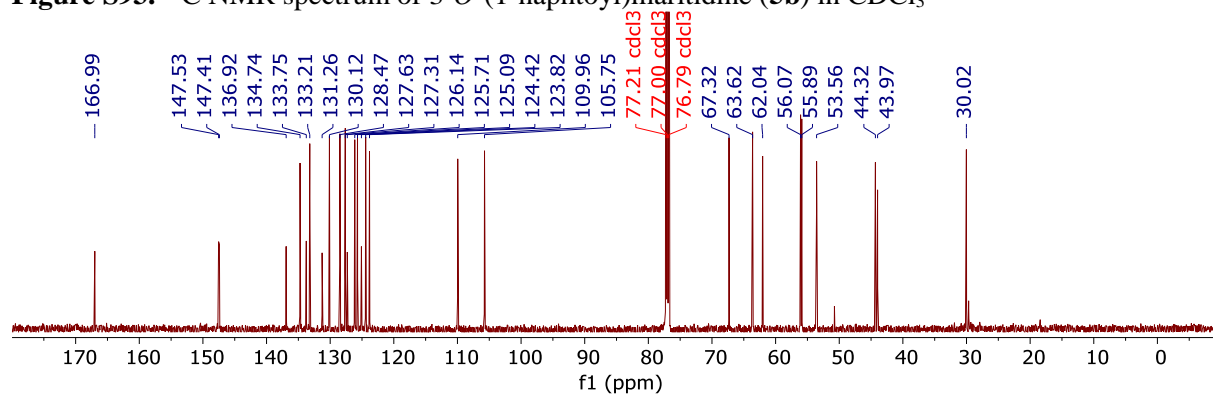

Supplement: s1 [file s1]
